# Supplementary material for: Host Stress Drives Salmonella Recrudescence
Source: PubMed Central journal article supplement (PMC4746619; doi:10.1038/srep20849), 2016-02-09
Supplement: srep20849-s1.pdf [file srep20849-s1.pdf]

## **Supplementary information**

### **Host Stress Drives *Salmonella* Recrudescence**

Elin Verbrugghe<sup>a,\*</sup>, Maarten Dhaenens<sup>b,¶</sup>, Bregje Leyman<sup>a,¶,#</sup>, Filip Boyen<sup>a</sup>, Neil Shearer<sup>c</sup>,  
Alexander Van Parys<sup>a,#</sup>, Roel Haesendonck<sup>a</sup>, Wim Bert<sup>d</sup>, Herman Favoreel<sup>e</sup>, Dieter Deforce<sup>b</sup>,  
Arthur Thompson<sup>c</sup>, Freddy Haesebrouck<sup>a</sup>, Frank Pasmans<sup>a,\*</sup>

### Supplementary Table S3:

| ID                                         | Common name | WT+C        | t-test P-value | SCSA+C      | t-test P-value |
|--------------------------------------------|-------------|-------------|----------------|-------------|----------------|
| <b>Amino acid transport and metabolism</b> |             |             |                |             |                |
| STM0002                                    | thrA        | 0,81        | 0,05           | 1,03        | 0,08           |
| STM0003                                    | thrB        | 1,41        | 0,01           | 1,48        | 0,07           |
| STM0006                                    | yaaJ        | 1,65        | 0,03           | 1,41        | 0,01           |
| STM0064                                    | dapB        | 1,26        | 0,07           | 0,57        | 0,06           |
| STM0066                                    | carA        | 1,22        | 0,04           | 1,29        | 0,08           |
| STM0110                                    | leuD        | 0,52        | 0,06           | <b>7,26</b> | <b>0,00</b>    |
| STM0111                                    | leuC        | 1,42        | 0,01           | 1,48        | 0,07           |
| STM0112                                    | leuB        | <b>2,19</b> | <b>0,01</b>    | 0,88        | 0,09           |
| STM0116                                    | ilvI        | 0,97        | 0,09           | <b>3,80</b> | <b>0,00</b>    |
| STM0117                                    | ilvH        | <b>0,15</b> | <b>0,03</b>    | 0,63        | 0,05           |
| STM0150                                    | aroP        | <b>2,61</b> | <b>0,00</b>    | 0,62        | 0,07           |
| STM0165                                    | speD        | 0,86        | 0,02           | 0,93        | 0,07           |
| STM0166                                    | speE        | 0,69        | 0,03           | 1,32        | 0,02           |
| STM0234                                    | ldcC        | 0,78        | 0,08           | 0,81        | 0,01           |
| STM0235                                    | yaeR        | 1,63        | 0,00           | <b>0,27</b> | <b>0,03</b>    |
| STM0248                                    | yaeD        | 0,69        | 0,01           | 0,58        | 0,01           |
| STM0316                                    | pepD        | 1,05        | 0,10           | 0,62        | 0,06           |
| STM0321                                    | proB        | 1,75        | 0,02           | 0,60        | 0,04           |
| STM0322                                    | proA        | 0,54        | 0,02           | 0,62        | 0,02           |
| STM0329                                    |             | 0,88        | 0,04           | 1,41        | 0,05           |
| STM0330                                    |             | 1,24        | 0,08           | <b>0,16</b> | <b>0,00</b>    |
| STM0365                                    | yahN        | 0,46        | 0,06           | 1,66        | 0,06           |
| STM0386                                    | proC        | 0,91        | 0,06           | 0,57        | 0,01           |
| STM0388                                    | aroL        | 0,84        | 0,04           | 0,74        | 0,02           |
| STM0399                                    | brnQ        | 4,89        | 0,03           | 0,54        | 0,04           |
| STM0400                                    | proY        | 0,61        | 0,01           | 4,03        | 0,04           |
| STM0426                                    | phnV        | 1,02        | 0,09           | 2,09        | 0,00           |
| STM0428                                    | phnT        | 0,72        | 0,03           | 0,53        | 0,01           |
| STM0431                                    | phnW        | 5,55        | 0,03           | 2,03        | 0,04           |
| STM0458                                    |             | 0,30        | 0,01           | 0,35        | 0,03           |
| STM0462                                    | glnK        | 0,76        | 0,03           | 0,79        | 0,08           |
| STM0506                                    | tesA        | 1,45        | 0,03           | 1,56        | 0,06           |
| STM0527                                    | allC        | 0,81        | 0,03           | 0,83        | 0,05           |
| STM0532                                    | arcC        | 0,76        | 0,00           | 1,65        | 0,06           |
| STM0568                                    | pheP        | 0,66        | 0,04           | 0,91        | 0,08           |
| STM0603                                    | ybdL        | 4,03        | 0,03           | 0,63        | 0,06           |
| STM0615                                    | ybdR        | 0,48        | 0,01           | 2,61        | 0,04           |
| STM0644                                    | cobD        |             |                |             |                |
| STM0662                                    | gltL        | 0,96        | 0,08           | 0,97        | 0,08           |
| STM0663                                    | gltK        | 1,50        | 0,02           | 1,19        | 0,04           |

|         |      |      |      |      |      |
|---------|------|------|------|------|------|
| STM0664 | gltJ | 1,61 | 0,01 | 2,05 | 0,02 |
| STM0665 | gltI | 0,89 | 0,05 | 0,58 | 0,00 |
| STM0680 | asnB | 1,05 | 0,08 | 0,96 | 0,07 |
| STM0700 | potE | 0,24 | 0,00 | 1,12 | 0,09 |
| STM0701 | speF | 0,51 | 0,04 | 1,46 | 0,06 |
| STM0710 | ybgH | 1,09 | 0,09 | 1,22 | 0,07 |
| STM0712 | ybgJ | 1,05 | 0,08 | 1,11 | 0,08 |
| STM0713 | ybgK | 1,20 | 0,08 | 0,84 | 0,08 |
| STM0760 | aroG | 0,70 | 0,01 | 0,67 | 0,01 |
| STM0788 | hutG | 0,53 | 0,06 | 0,73 | 0,05 |
| STM0791 | hutH | 0,64 | 0,05 | 1,00 | 0,10 |
| STM0822 | ybiB | 1,10 | 0,01 | 0,64 | 0,00 |
| STM0828 | glnQ | 0,78 | 0,00 | 0,64 | 0,00 |
| STM0829 | glnP | 1,19 | 0,00 | 2,07 | 0,01 |
| STM0830 | glnH | 1,21 | 0,04 | 0,69 | 0,03 |
| STM0847 | ybiK | 1,07 | 0,06 | 0,69 | 0,00 |
| STM0849 | yliB | 0,94 | 0,09 | 0,20 | 0,01 |
| STM0850 | yliC | 0,49 | 0,03 | 1,46 | 0,07 |
| STM0851 | yliD | 0,74 | 0,07 | 0,81 | 0,08 |
| STM0877 | potF | 1,27 | 0,03 | 1,65 | 0,04 |
| STM0878 | potG | 0,78 | 0,03 | 0,77 | 0,02 |
| STM0879 | potH | 0,94 | 0,08 | 1,54 | 0,07 |
| STM0880 | potI | 1,17 | 0,03 | 0,50 | 0,00 |
| STM0888 | artM | 0,76 | 0,01 | 0,62 | 0,01 |
| STM0889 | artQ | 1,01 | 0,10 | 1,51 | 0,00 |
| STM0890 | artI | 0,87 | 0,02 | 0,55 | 0,00 |
| STM0891 | artP | 0,85 | 0,03 | 0,63 | 0,02 |
| STM0934 | ltaA | 3,39 | 0,03 | 0,14 | 0,01 |
| STM0935 | poxB | 1,18 | 0,09 | 0,37 | 0,02 |
| STM0969 | ycaM | 1,79 | 0,06 | 0,95 | 0,09 |
| STM0978 | aroA | 0,78 | 0,02 | 1,13 | 0,02 |
| STM0998 | aspC | 0,90 | 0,04 | 0,76 | 0,00 |
| STM1002 |      | 1,03 | 0,10 | 1,37 | 0,07 |
| STM1003 |      | 3,39 | 0,02 | 0,17 | 0,01 |
| STM1057 | pepN | 0,96 | 0,09 | 1,24 | 0,08 |
| STM1094 | pipD | 1,02 | 0,09 | 0,56 | 0,03 |
| STM1104 | hpaF |      |      | 0,12 |      |
| STM1125 | putP | 2,58 | 0,02 | 0,63 | 0,03 |
| STM1128 |      | 0,27 | 0,00 | 6,43 | 0,00 |
| STM1135 | ycdW | 0,92 | 0,05 | 0,92 | 0,07 |
| STM1136 | ycdX | 1,05 | 0,08 | 0,25 | 0,00 |
| STM1160 | solA | 1,33 | 0,07 | 0,32 | 0,02 |
| STM1198 | pabC | 0,78 | 0,01 | 0,48 | 0,00 |
| STM1222 | potD | 0,22 | 0,02 | 0,21 | 0,00 |
| STM1223 | potC | 4,91 | 0,02 | 0,20 | 0,04 |
| STM1225 | potB | 0,76 | 0,00 | 1,54 | 0,06 |

|         |       |      |      |       |      |
|---------|-------|------|------|-------|------|
| STM1226 | potA  | 0,36 | 0,03 | 1,01  | 0,10 |
| STM1227 | pepT  | 0,83 | 0,03 | 0,84  | 0,05 |
| STM1255 |       | 0,85 | 0,02 | 1,46  | 0,07 |
| STM1256 |       | 1,20 | 0,07 | 1,35  | 0,07 |
| STM1257 |       | 3,79 | 0,02 | 0,18  | 0,01 |
| STM1259 |       | 0,69 | 0,01 | 1,55  | 0,06 |
| STM1269 |       | 1,51 | 0,01 | 1,56  | 0,07 |
| STM1270 | yeaS  | 1,14 | 0,02 | 0,81  | 0,05 |
| STM1294 | ansA  | 1,16 | 0,07 | 1,12  | 0,02 |
| STM1297 | selD  | 1,07 | 0,07 | 0,48  | 0,00 |
| STM1299 | gdhA  | 1,06 | 0,08 | 0,61  | 0,00 |
| STM1303 | astC  | 0,50 | 0,03 | 1,21  | 0,08 |
| STM1304 | astA  | 3,00 | 0,04 | 0,27  | 0,02 |
| STM1306 | astB  | 1,05 | 0,07 | 2,16  | 0,05 |
| STM1307 | astE  | 1,00 | 0,10 | 1,97  | 0,03 |
| STM1347 | aroH  | 1,30 | 0,04 | 1,52  | 0,02 |
| STM1358 | aroD  | 0,93 | 0,07 | 1,18  | 0,06 |
| STM1359 | ydiB  | 1,18 | 0,03 | 0,61  | 0,02 |
| STM1373 | sufS  | 0,39 | 0,03 | 1,54  | 0,05 |
| STM1379 | orf48 | 1,23 | 0,02 | 1,04  | 0,10 |
| STM1435 | gloA  | 3,04 | 0,03 | 0,13  | 0,01 |
| STM1452 | ydgR  | 1,70 | 0,02 | 1,22  | 0,09 |
| STM1477 | ydgl  | 0,76 | 0,02 | 0,74  | 0,01 |
| STM1484 |       | 0,84 | 0,05 | 0,70  | 0,02 |
| STM1491 |       | 0,93 | 0,07 | 0,81  | 0,05 |
| STM1492 |       | 1,27 | 0,08 | 0,23  | 0,01 |
| STM1494 |       | 2,26 | 0,00 | 2,36  | 0,04 |
| STM1506 | rspB  | 3,66 | 0,02 | 0,16  | 0,01 |
| STM1512 | dcp   | 0,67 | 0,03 | 0,67  | 0,00 |
| STM1525 | yneH  | 0,27 | 0,00 | 0,19  | 0,01 |
| STM1542 |       | 2,73 | 0,04 | 1,36  | 0,06 |
| STM1557 |       | 0,71 | 0,01 | 0,75  | 0,01 |
| STM1584 | ansP  | 0,58 | 0,06 | 1,00  | 0,10 |
| STM1633 |       | 0,90 | 0,05 | 10,58 | 0,02 |
| STM1634 |       | 1,02 | 0,09 | 1,45  | 0,04 |
| STM1635 |       | 1,11 | 0,07 | 1,18  | 0,06 |
| STM1636 |       | 1,04 | 0,09 | 1,18  | 0,08 |
| STM1679 | mppA  | 0,93 | 0,07 | 0,79  | 0,02 |
| STM1680 | ycjI  | 0,84 | 0,01 | 0,78  | 0,05 |
| STM1692 | sapA  | 1,20 | 0,02 | 1,04  | 0,09 |
| STM1723 | trpE  | 0,95 | 0,08 | 1,89  | 0,01 |
| STM1724 | trpD  | 0,21 | 0,01 | 1,27  | 0,06 |
| STM1725 | trpC  | 1,43 | 0,03 | 0,95  | 0,09 |
| STM1726 | trpB  | 1,54 | 0,09 | 1,91  | 0,06 |
| STM1727 | trpA  | 0,23 | 0,03 | 0,35  | 0,04 |
| STM1742 | oppF  | 1,14 | 0,08 | 0,90  | 0,09 |

|         |      |      |      |      |      |
|---------|------|------|------|------|------|
| STM1743 | oppD | 0,76 | 0,03 | 0,63 | 0,05 |
| STM1744 | oppC | 1,05 | 0,06 | 0,94 | 0,07 |
| STM1745 | oppB | 0,18 | 0,02 | 2,88 | 0,02 |
| STM1746 | oppA | 1,06 | 0,07 | 0,63 | 0,00 |
| STM1795 |      | 0,94 | 0,09 | 3,18 | 0,02 |
| STM1803 | dadA | 0,84 | 0,02 | 0,77 | 0,04 |
| STM1824 | pabB | 0,32 | 0,04 | 0,71 | 0,08 |
| STM1826 | sdaA | 0,91 | 0,04 | 0,82 | 0,02 |
| STM1879 | ptrB | 1,06 | 0,08 | 0,68 | 0,00 |
| STM1937 | tyrP | 0,42 | 0,04 | 3,78 | 0,02 |
| STM1951 | yecC | 0,95 | 0,09 | 1,04 | 0,08 |
| STM1952 | yecS | 0,87 | 0,03 | 0,62 | 0,03 |
| STM1953 | yedO | 0,85 | 0,01 | 0,74 | 0,04 |
| STM1954 | fliY | 2,09 | 0,03 | 0,86 | 0,09 |
| STM2039 | pudB | 1,03 | 0,09 | 1,53 | 0,07 |
| STM2055 | pduU | 0,69 | 0,08 | 1,52 | 0,01 |
| STM2056 | pduV | 0,67 | 0,02 | 0,93 | 0,03 |
| STM2068 | yeeF | 0,66 | 0,08 | 4,31 | 0,03 |
| STM2071 | hisG | 1,03 | 0,08 | 1,40 | 0,02 |
| STM2072 | hisD | 0,86 | 0,04 | 0,64 | 0,01 |
| STM2073 | hisC | 1,16 | 0,01 | 0,87 | 0,02 |
| STM2074 | hisB | 0,76 | 0,06 | 0,33 | 0,02 |
| STM2075 | hisH | 1,38 | 0,01 | 0,52 | 0,01 |
| STM2077 | hisF | 0,86 | 0,04 | 0,56 | 0,00 |
| STM2078 | hisI | 0,82 | 0,06 | 1,59 | 0,03 |
| STM2114 | wcaB | 1,08 | 0,05 | 0,90 | 0,09 |
| STM2162 | yehW | 0,96 | 0,08 | 1,09 | 0,08 |
| STM2163 | yehX | 1,38 | 0,06 | 2,13 | 0,03 |
| STM2164 | yehY | 0,65 | 0,03 | 0,62 | 0,01 |
| STM2186 |      | 1,00 | 0,10 | 1,40 | 0,07 |
| STM2196 |      | 0,97 | 0,10 | 0,32 | 0,03 |
| STM2197 |      | 0,65 | 0,05 | 1,72 | 0,07 |
| STM2200 | lysP | 1,19 | 0,07 | 1,16 | 0,03 |
| STM2216 | yejA | 2,64 | 0,07 | 0,92 | 0,07 |
| STM2285 | glpB | 2,31 | 0,04 | 0,17 | 0,01 |
| STM2331 | yfbQ | 1,08 | 0,01 | 0,89 | 0,05 |
| STM2351 | hisP | 1,12 | 0,02 | 1,26 | 0,08 |
| STM2352 | hisM | 9,39 | 0,00 | 0,67 | 0,07 |
| STM2353 | hisQ | 0,94 | 0,09 | 0,63 | 0,07 |
| STM2354 | hisJ | 0,88 | 0,03 | 0,55 | 0,01 |
| STM2355 | argT | 0,47 | 0,05 | 0,74 | 0,07 |
| STM2357 |      | 0,89 | 0,06 | 1,19 | 0,04 |
| STM2358 |      | 2,06 | 0,06 | 0,68 | 0,06 |
| STM2359 |      | 1,70 | 0,07 | 0,41 | 0,01 |
| STM2360 |      | 0,54 | 0,00 | 0,53 | 0,01 |
| STM2369 | usg  | 0,94 | 0,08 | 0,76 | 0,03 |

|         |      |      |      |      |      |
|---------|------|------|------|------|------|
| STM2370 | pdxB | 0,99 | 0,10 | 0,63 | 0,00 |
| STM2384 | aroC | 1,01 | 0,10 | 0,65 | 0,06 |
| STM2402 | yfdZ | 0,88 | 0,04 | 0,54 | 0,00 |
| STM2429 | cysZ | 0,97 | 0,08 | 1,10 | 0,07 |
| STM2430 | cysK | 1,28 | 0,02 | 1,46 | 0,08 |
| STM2440 | cysM | 1,01 | 0,10 | 1,35 | 0,07 |
| STM2456 | eutL | 5,65 | 0,04 | 0,40 | 0,01 |
| STM2457 | eutC | 0,70 | 0,02 | 0,66 | 0,00 |
| STM2458 | eutB | 4,27 | 0,02 | 1,56 | 0,03 |
| STM2459 | eutA | 0,98 | 0,09 | 1,23 | 0,03 |
| STM2460 | eutH | 2,36 | 0,01 | 3,65 | 0,02 |
| STM2462 | eutJ | 0,83 | 0,03 | 1,54 | 0,04 |
| STM2467 | eutT | 0,98 | 0,10 | 0,91 | 0,07 |
| STM2468 | eutQ | 0,80 | 0,04 | 0,76 | 0,01 |
| STM2469 | eutP | 1,07 | 0,08 | 1,37 | 0,01 |
| STM2470 | eutS | 2,06 | 0,00 | 0,76 | 0,01 |
| STM2479 | aegA | 1,20 | 0,07 | 2,22 | 0,03 |
| STM2483 | dapE | 1,37 | 0,06 | 0,83 | 0,07 |
| STM2489 | dapA | 0,85 | 0,08 | 1,03 | 0,10 |
| STM2490 | gcvR | 0,87 | 0,07 | 0,85 | 0,08 |
| STM2536 | pepB | 0,30 | 0,04 | 0,92 | 0,08 |
| STM2543 | nifS | 1,35 | 0,01 | 0,91 | 0,02 |
| STM2555 | glyA | 0,52 | 0,02 | 0,69 | 0,02 |
| STM2558 | cadB | 0,51 | 0,02 | 0,44 | 0,00 |
| STM2559 | cadA | 0,90 | 0,08 | 0,97 | 0,10 |
| STM2560 | yjdL | 0,19 | 0,03 | 0,91 | 0,08 |
| STM2561 | glnB | 1,26 | 0,02 | 1,05 | 0,07 |
| STM2569 | yfhB | 0,91 | 0,07 | 1,39 | 0,02 |
| STM2645 | yfiK | 0,66 | 0,07 | 1,51 | 0,01 |
| STM2667 | pheA | 0,78 | 0,03 | 0,95 | 0,08 |
| STM2669 | tyrA | 1,12 | 0,03 | 0,43 | 0,00 |
| STM2670 | aroF | 0,77 | 0,03 | 0,51 | 0,02 |
| STM2792 | gabT | 0,93 | 0,09 | 0,45 | 0,04 |
| STM2793 | gabP | 1,09 | 0,06 | 2,98 | 0,04 |
| STM2809 | proV | 3,55 | 0,02 | 0,15 | 0,01 |
| STM2810 | proW | 0,92 | 0,06 | 1,03 | 0,09 |
| STM2811 | proX | 0,99 | 0,10 | 0,58 | 0,02 |
| STM2935 | cysD | 1,14 | 0,06 | 0,42 | 0,04 |
| STM2946 | cysH | 1,26 | 0,00 | 0,64 | 0,01 |
| STM2970 | sdaC | 1,05 | 0,01 | 0,63 | 0,01 |
| STM2971 | sdaB | 0,94 | 0,05 | 0,89 | 0,02 |
| STM2984 | csdA | 3,30 | 0,00 | 7,34 | 0,00 |
| STM2992 | argA | 0,90 | 0,07 | 0,34 | 0,01 |
| STM3013 | lysA | 0,84 | 0,05 | 0,62 | 0,02 |
| STM3022 |      | 0,53 | 0,05 | 6,97 | 0,02 |
| STM3053 | gcvP | 0,85 | 0,02 | 0,69 | 0,00 |

|         |      |      |      |       |      |
|---------|------|------|------|-------|------|
| STM3054 | gcvH | 0,34 | 0,04 | 0,60  | 0,07 |
| STM3055 | gcvT | 1,08 | 0,07 | 0,40  | 0,01 |
| STM3058 | pepP | 1,21 | 0,02 | 0,66  | 0,03 |
| STM3062 | serA | 1,03 | 0,08 | 0,62  | 0,01 |
| STM3078 | speB | 0,77 | 0,00 | 0,77  | 0,02 |
| STM3082 |      | 0,39 | 0,04 | 1,56  | 0,06 |
| STM3106 | ansB | 0,19 | 0,02 | 1,25  | 0,08 |
| STM3114 | speC | 1,97 | 0,03 | 0,89  | 0,06 |
| STM3117 |      | 1,26 | 0,08 | 0,15  | 0,01 |
| STM3126 |      | 0,64 | 0,05 | 4,81  | 0,02 |
| STM3128 |      | 1,54 | 0,02 | 1,59  | 0,07 |
| STM3139 | gsp  | 0,94 | 0,07 | 0,85  | 0,06 |
| STM3161 | metC | 0,68 | 0,02 | 1,08  | 0,07 |
| STM3188 | ygiC | 0,82 | 0,06 | 0,85  | 0,08 |
| STM3218 | oat  | 1,30 | 0,05 | 0,30  | 0,01 |
| STM3225 | ygjU | 0,89 | 0,09 | 0,99  | 0,10 |
| STM3239 | yhaO | 0,64 | 0,04 | 3,42  | 0,03 |
| STM3240 | tdcG | 0,44 | 0,05 | 1,27  | 0,08 |
| STM3243 | tdcC | 0,33 | 0,01 | 1,26  | 0,08 |
| STM3244 | tdcB | 1,00 | 0,10 | 5,31  | 0,01 |
| STM3261 |      | 0,75 | 0,00 | 1,61  | 0,06 |
| STM3279 | mtr  | 0,79 | 0,02 | 0,75  | 0,02 |
| STM3290 | argG | 0,85 | 0,03 | 0,59  | 0,02 |
| STM3331 | gltD | 1,44 | 0,00 | 1,42  | 0,07 |
| STM3339 | nanA | 2,03 | 0,00 | 2,01  | 0,04 |
| STM3360 | argR | 2,79 | 0,03 | 0,13  | 0,01 |
| STM3401 | aroE | 0,84 | 0,03 | 0,60  | 0,00 |
| STM3468 | argD | 1,26 | 0,01 | 0,42  | 0,01 |
| STM3469 | pabA | 1,36 | 0,06 | 0,91  | 0,06 |
| STM3486 | aroB | 0,47 | 0,01 | 1,07  | 0,01 |
| STM3487 | aroK | 1,12 | 0,06 | 0,61  | 0,02 |
| STM3532 |      | 0,69 | 0,02 | 0,80  | 0,07 |
| STM3539 | asd  | 0,78 | 0,04 | 0,71  | 0,01 |
| STM3551 | ggt  | 1,14 | 0,08 | 0,59  | 0,03 |
| STM3560 | livF | 0,67 | 0,01 | 1,02  | 0,09 |
| STM3561 | livG | 0,80 | 0,02 | 1,65  | 0,03 |
| STM3562 | livM | 1,36 | 0,05 | 1,83  | 0,06 |
| STM3563 | livH | 0,97 | 0,09 | 0,64  | 0,01 |
| STM3564 | livK | 0,52 | 0,04 | 6,24  | 0,01 |
| STM3567 | livJ | 0,58 | 0,04 | 10,80 | 0,00 |
| STM3592 | yhiP | 0,75 | 0,02 | 0,98  | 0,10 |
| STM3594 | prlC | 1,30 | 0,04 | 1,41  | 0,07 |
| STM3598 |      |      |      | 0,27  | 0,01 |
| STM3625 | yhjV | 0,84 | 0,02 | 1,80  | 0,03 |
| STM3627 | dppD | 0,89 | 0,05 | 0,68  | 0,01 |
| STM3628 | dppC | 0,76 | 0,01 | 1,08  | 0,07 |

|         |      |      |      |      |      |
|---------|------|------|------|------|------|
| STM3629 | dppB | 1,35 | 0,02 | 1,15 | 0,03 |
| STM3630 | dppA | 1,31 | 0,03 | 1,44 | 0,07 |
| STM3665 | avtA | 1,27 | 0,01 | 0,79 | 0,00 |
| STM3683 | selA | 1,02 | 0,09 | 0,70 | 0,00 |
| STM3699 | cysE | 1,11 | 0,06 | 0,60 | 0,01 |
| STM3708 | tdh  | 1,17 | 0,02 | 0,69 | 0,00 |
| STM3746 | gltS | 0,11 | 0,01 | 0,75 | 0,08 |
| STM3768 |      | 0,98 | 0,10 | 1,21 | 0,08 |
| STM3795 | ilvN | 1,01 | 0,08 | 0,60 | 0,03 |
| STM3796 | ilvB | 0,86 | 0,03 | 0,87 | 0,09 |
| STM3802 | dsdA | 1,83 | 0,05 | 0,91 | 0,09 |
| STM3859 |      | 1,00 | 0,10 | 1,03 | 0,09 |
| STM3877 | asnA | 1,11 | 0,08 | 1,19 | 0,09 |
| STM3901 | ilvG | 0,85 | 0,02 | 0,90 | 0,07 |
| STM3903 | ilvE | 0,63 | 0,00 | 1,87 | 0,06 |
| STM3904 | ilvD | 1,08 | 0,04 | 0,58 | 0,02 |
| STM3905 | ilvA | 0,95 | 0,04 | 0,82 | 0,02 |
| STM3909 | ilvC | 1,23 | 0,01 | 0,41 | 0,00 |
| STM3930 | yifK | 0,75 | 0,03 | 0,72 | 0,01 |
| STM3947 | dapF | 0,73 | 0,00 | 0,49 | 0,01 |
| STM3959 | rhtC | 0,70 | 0,02 | 0,47 | 0,01 |
| STM3960 | rthB | 0,79 | 0,05 | 0,72 | 0,01 |
| STM3965 | metE | 0,71 | 0,01 | 0,87 | 0,04 |
| STM3984 | pepQ | 3,36 | 0,03 | 0,17 | 0,01 |
| STM4007 | glnA | 0,95 | 0,06 | 0,55 | 0,00 |
| STM4042 |      | 1,26 | 0,04 | 5,93 | 0,02 |
| STM4099 | metJ | 0,74 | 0,00 | 0,65 | 0,02 |
| STM4100 | metB | 0,41 | 0,05 | 0,67 | 0,07 |
| STM4105 | metF | 1,52 | 0,04 | 4,99 | 0,03 |
| STM4120 | argE | 0,93 | 0,02 | 0,64 | 0,02 |
| STM4121 | argC | 1,36 | 0,03 | 1,33 | 0,08 |
| STM4122 | argB | 1,06 | 0,05 | 0,47 | 0,01 |
| STM4182 | metA | 3,81 | 0,01 | 1,95 | 0,02 |
| STM4188 | metH | 0,20 | 0,02 | 1,15 | 0,08 |
| STM4190 | pepE | 0,82 | 0,01 | 0,92 | 0,08 |
| STM4220 | lysC | 0,87 | 0,00 | 0,73 | 0,03 |
| STM4248 | tyrB | 0,95 | 0,07 | 0,77 | 0,02 |
| STM4296 | adi  |      |      | 0,62 |      |
| STM4326 | aspA | 1,16 | 0,08 | 0,70 | 0,07 |
| STM4328 | yjeH | 1,04 | 0,10 | 1,10 | 0,09 |
| STM4333 | yjeK | 0,85 | 0,06 | 0,91 | 0,09 |
| STM4345 | yjeM | 0,85 | 0,03 | 0,99 | 0,10 |
| STM4351 |      | 0,57 | 0,04 | 0,46 | 0,01 |
| STM4376 | yjfC | 0,62 | 0,04 | 1,69 | 0,07 |
| STM4398 | cycA | 0,12 | 0,01 | 1,22 | 0,07 |
| STM4431 |      | 1,06 | 0,05 | 2,22 | 0,05 |



|         |      |      |      |      |      |
|---------|------|------|------|------|------|
| STM4432 |      | 0,34 | 0,00 | 1,63 | 0,04 |
| STM4446 |      | 0,39 | 0,04 | 2,28 | 0,04 |
| STM4463 |      | 0,97 | 0,07 | 0,77 | 0,02 |
| STM4465 |      | 0,72 | 0,01 | 0,66 | 0,00 |
| STM4466 |      | 0,96 | 0,03 | 0,48 | 0,02 |
| STM4467 |      |      |      |      |      |
| STM4469 | argI | 1,14 | 0,00 | 0,53 | 0,01 |
| STM4477 | pepA | 0,83 | 0,00 | 0,80 | 0,01 |
| STM4484 | idnD | 0,97 | 0,08 | 0,52 | 0,02 |
| STM4578 | serB | 0,45 | 0,04 | 0,60 | 0,03 |

### Carbohydrate transport and metabolism

|         |       |      |      |       |      |
|---------|-------|------|------|-------|------|
| STM0007 | talB  | 1,41 | 0,01 | 0,84  | 0,03 |
| STM0018 |       | 0,12 | 0,03 | 0,64  | 0,00 |
| STM0041 |       | 0,57 | 0,04 | 15,30 | 0,02 |
| STM0042 |       | 0,68 | 0,01 | 4,78  | 0,03 |
| STM0060 | citE2 | 3,37 | 0,02 | 0,19  | 0,01 |
| STM0079 | yaaU  | 0,24 | 0,05 | 0,42  | 0,05 |
| STM0101 | araD  | 0,65 | 0,05 | 2,89  | 0,04 |
| STM0149 |       | 0,78 | 0,02 | 0,80  | 0,02 |
| STM0169 | gcd   | 0,90 | 0,05 | 0,76  | 0,03 |
| STM0178 | yadI  | 0,44 | 0,02 | 0,69  | 0,08 |
| STM0212 |       | 1,08 | 0,09 | 0,97  | 0,06 |
| STM0257 |       | 1,97 | 0,00 | 5,25  | 0,01 |
| STM0303 | ybeJ  | 1,42 | 0,07 | 0,34  | 0,00 |
| STM0310 | ghmA  | 0,71 | 0,00 | 0,54  | 0,00 |
| STM0356 |       | 0,01 | 0,10 | 4,84  | 0,04 |
| STM0368 | prpB  | 0,88 | 0,05 | 0,72  | 0,01 |
| STM0382 |       | 0,84 | 0,01 | 0,99  | 0,09 |
| STM0394 | araJ  | 0,24 | 0,03 | 0,59  | 0,02 |
| STM0401 | malZ  | 0,72 | 0,08 | 3,40  | 0,01 |
| STM0436 | yajR  | 0,82 | 0,04 | 0,77  | 0,00 |
| STM0444 | ampG  | 0,63 | 0,00 | 7,62  | 0,02 |
| STM0491 | gsk   | 1,19 | 0,06 | 1,12  | 0,09 |
| STM0493 | fsr   | 0,72 | 0,01 | 0,78  | 0,01 |
| STM0518 | gip   | 0,73 | 0,02 | 0,79  | 0,02 |
| STM0520 |       | 0,97 | 0,09 | 0,62  | 0,02 |
| STM0525 | glxK  | 2,16 | 0,00 | 2,38  | 0,04 |
| STM0574 |       | 0,99 | 0,09 | 0,51  | 0,02 |
| STM0575 |       | 1,09 | 0,05 | 1,48  | 0,07 |
| STM0576 |       | 0,78 | 0,01 | 1,65  | 0,03 |
| STM0577 |       | 1,01 | 0,10 | 1,14  | 0,09 |
| STM0593 | ybdA  | 0,99 | 0,10 | 1,31  | 0,01 |
| STM0622 | citE  | 0,85 | 0,03 | 2,59  | 0,05 |
| STM0643 | cobC  | 1,45 | 0,01 | 3,77  | 0,00 |
| STM0649 |       | 0,24 | 0,00 | 1,64  | 0,06 |

|         |      |              |             |             |             |
|---------|------|--------------|-------------|-------------|-------------|
| STM0650 |      | 1,01         | 0,10        | 1,17        | 0,09        |
| STM0681 | nagD | 1,44         | 0,02        | 1,17        | 0,01        |
| STM0683 | nagA | 0,91         | 0,04        | 1,14        | 0,04        |
| STM0684 | nagB | 1,20         | 0,02        | 1,79        | 0,03        |
| STM0685 | nagE | <b>0,18</b>  | <b>0,02</b> | 1,30        | 0,02        |
| STM0689 | citA | 0,84         | 0,02        | <b>2,09</b> | <b>0,05</b> |
| STM0698 | pgm  | <b>0,48</b>  | <b>0,04</b> | 0,60        | 0,04        |
| STM0722 |      | 0,75         | 0,02        | 0,84        | 0,02        |
| STM0723 |      | 0,69         | 0,04        | 0,97        | 0,10        |
| STM0772 | gpmA | 1,10         | 0,06        | <b>0,41</b> | <b>0,00</b> |
| STM0773 | galM | 1,06         | 0,07        | <b>0,46</b> | <b>0,04</b> |
| STM0785 | ybhE | 1,50         | 0,02        | 0,71        | 0,00        |
| STM0786 | ybhC | 1,46         | 0,02        | 1,35        | 0,00        |
| STM0854 |      | 0,59         | 0,04        | 1,86        | 0,07        |
| STM0860 |      | 1,38         | 0,05        | 2,75        | 0,06        |
| STM0861 | ylil | <b>3,56</b>  | <b>0,02</b> | <b>0,27</b> | <b>0,02</b> |
| STM0866 | mdfA | 1,61         | 0,06        | 0,97        | 0,10        |
| STM0868 |      | 0,94         | 0,08        | 1,32        | 0,06        |
| STM0885 |      | <b>0,40</b>  | <b>0,02</b> | <b>3,91</b> | <b>0,02</b> |
| STM0928 | nanH | 0,92         | 0,07        | 1,30        | 0,08        |
| STM0968 | ycaD | 1,06         | 0,07        | 1,25        | 0,08        |
| STM1076 | mgsA | 1,02         | 0,10        | 0,79        | 0,08        |
| STM1106 | hpaI | 1,15         | 0,06        | 1,25        | 0,05        |
| STM1107 | hpaX | 0,94         | 0,07        | 1,04        | 0,09        |
| STM1129 |      | 1,04         | 0,09        | <b>2,35</b> | <b>0,03</b> |
| STM1132 |      | 0,74         | 0,01        | 1,50        | 0,04        |
| STM1154 | yceE | <b>0,08</b>  | <b>0,00</b> | <b>2,38</b> | <b>0,00</b> |
| STM1166 | yceL | <b>0,17</b>  | <b>0,02</b> | 0,91        | 0,08        |
| STM1203 | ptsG | 0,81         | 0,02        | 0,55        | 0,00        |
| STM1209 | nagZ | 0,91         | 0,02        | 0,76        | 0,01        |
| STM1252 |      | 0,88         | 0,02        | 1,13        | 0,06        |
| STM1289 | yeaD | 0,98         | 0,09        | 0,66        | 0,00        |
| STM1290 | gapA | 1,35         | 0,04        | 1,44        | 0,07        |
| STM1313 | celB | 1,03         | 0,09        | 1,87        | 0,01        |
| STM1314 | celC | <b>0,25</b>  | <b>0,03</b> | 1,41        | 0,07        |
| STM1316 | celF | 1,06         | 0,07        | <b>2,56</b> | <b>0,04</b> |
| STM1326 | pfkB | 0,78         | 0,01        | 0,75        | 0,00        |
| STM1349 | pps  | 1,11         | 0,04        | 0,61        | 0,00        |
| STM1360 | ydiN | 0,84         | 0,03        | <b>2,68</b> | <b>0,05</b> |
| STM1378 | pykF | 0,89         | 0,03        | 0,76        | 0,01        |
| STM1428 | ydhC | 1,11         | 0,09        | 0,95        | 0,09        |
| STM1467 | manA | 1,67         | 0,05        | 0,63        | 0,05        |
| STM1486 | ynfM | 0,93         | 0,06        | 1,07        | 0,06        |
| STM1507 | ydfJ | 0,60         | 0,03        | 1,63        | 0,07        |
| STM1508 | ydfI | 0,78         | 0,01        | 1,53        | 0,06        |
| STM1516 | ydeE | <b>13,96</b> | <b>0,00</b> | <b>2,66</b> | <b>0,04</b> |

|         |      |      |      |      |      |
|---------|------|------|------|------|------|
| STM1517 | ydeD | 2,30 | 0,03 | 0,45 | 0,00 |
| STM1522 | ydeA |      |      |      |      |
| STM1543 |      | 1,08 | 0,05 | 1,71 | 0,06 |
| STM1545 |      | 0,33 | 0,03 | 5,57 | 0,02 |
| STM1558 |      | 0,23 | 0,04 | 0,64 | 0,00 |
| STM1559 |      | 0,99 | 0,10 | 0,57 | 0,01 |
| STM1560 |      | 7,27 | 0,00 | 0,82 | 0,08 |
| STM1571 | yddG | 0,57 | 0,00 | 6,06 | 0,00 |
| STM1574 | smvA | 1,14 | 0,06 | 1,11 | 0,06 |
| STM1612 |      | 0,98 | 0,07 | 0,80 | 0,03 |
| STM1613 |      | 1,12 | 0,05 | 1,96 | 0,05 |
| STM1614 |      | 0,85 | 0,04 | 0,57 | 0,01 |
| STM1616 |      | 0,93 | 0,05 | 0,63 | 0,02 |
| STM1617 |      | 1,73 | 0,05 | 0,69 | 0,07 |
| STM1708 | yciM | 0,85 | 0,05 | 0,87 | 0,09 |
| STM1796 | treA | 0,42 | 0,04 | 0,94 | 0,08 |
| STM1830 | manX | 0,96 | 0,07 | 0,54 | 0,01 |
| STM1831 | manY | 0,84 | 0,04 | 0,60 | 0,00 |
| STM1832 | manZ | 0,84 | 0,05 | 1,27 | 0,08 |
| STM1843 |      | 1,04 | 0,07 | 0,69 | 0,07 |
| STM1862 | pagO | 0,68 | 0,08 | 0,43 | 0,04 |
| STM1884 | eda  | 1,03 | 0,09 | 0,81 | 0,06 |
| STM1886 | zwf  | 1,03 | 0,10 | 0,70 | 0,06 |
| STM1888 | pykA | 1,32 | 0,03 | 0,66 | 0,03 |
| STM1928 | otsA | 1,49 | 0,03 | 1,38 | 0,07 |
| STM1929 | otsB | 0,94 | 0,08 | 0,88 | 0,06 |
| STM1933 |      | 0,83 | 0,04 | 0,64 | 0,06 |
| STM1963 | amyA | 1,29 | 0,04 | 0,85 | 0,08 |
| STM1990 | yedA | 1,09 | 0,07 | 1,47 | 0,04 |
| STM2037 | pduF | 1,15 | 0,06 | 0,79 | 0,03 |
| STM2081 | gnd  | 0,86 | 0,06 | 0,72 | 0,06 |
| STM2083 | rfbK | 2,58 | 0,02 | 0,79 | 0,06 |
| STM2129 | yegB | 1,33 | 0,08 | 0,46 | 0,03 |
| STM2141 | fbaB | 0,88 | 0,05 | 0,41 | 0,00 |
| STM2142 | yegT | 1,04 | 0,08 | 2,27 | 0,05 |
| STM2144 | yegV | 0,41 | 0,01 | 0,77 | 0,01 |
| STM2166 | bglX | 2,72 | 0,04 | 1,56 | 0,07 |
| STM2179 |      | 0,94 | 0,06 | 0,93 | 0,07 |
| STM2188 | mgIC | 1,09 | 0,09 | 1,42 | 0,07 |
| STM2189 | mgIA | 0,74 | 0,00 | 1,76 | 0,06 |
| STM2190 | mgIB | 0,85 | 0,03 | 1,09 | 0,08 |
| STM2198 |      | 0,71 | 0,02 | 1,28 | 0,07 |
| STM2205 | fruK | 0,69 | 0,02 | 0,66 | 0,05 |
| STM2206 | fruF | 0,83 | 0,04 | 0,58 | 0,00 |
| STM2207 | setB | 0,32 | 0,01 | 2,24 | 0,02 |
| STM2221 | bcr  | 0,47 | 0,06 | 0,76 | 0,08 |

|         |      |      |      |      |      |
|---------|------|------|------|------|------|
| STM2274 |      | 0,60 | 0,04 | 7,18 | 0,02 |
| STM2280 |      | 3,48 | 0,02 | 0,18 | 0,01 |
| STM2283 | glpT | 1,16 | 0,09 | 1,09 | 0,09 |
| STM2289 |      | 1,12 | 0,03 | 3,74 | 0,02 |
| STM2290 | yfaV | 0,38 | 0,02 | 2,85 | 0,00 |
| STM2300 |      | 1,12 | 0,01 | 0,99 | 0,10 |
| STM2302 |      | 1,19 | 0,04 | 0,76 | 0,03 |
| STM2303 |      | 1,19 | 0,05 | 1,29 | 0,08 |
| STM2340 |      | 0,37 | 0,00 | 2,06 | 0,04 |
| STM2341 |      | 0,93 | 0,08 | 1,37 | 0,01 |
| STM2343 |      | 1,69 | 0,06 | 0,65 | 0,02 |
| STM2344 |      | 2,25 | 0,00 | 5,91 | 0,01 |
| STM2372 |      | 1,03 | 0,10 | 0,56 | 0,00 |
| STM2399 | pgtP | 3,04 | 0,03 | 0,46 | 0,04 |
| STM2403 | glk  | 0,93 | 0,04 | 0,79 | 0,01 |
| STM2405 |      | 1,07 | 0,08 | 1,27 | 0,09 |
| STM2421 | xapB | 1,14 | 0,05 | 0,61 | 0,01 |
| STM2431 | ptsH | 1,58 | 0,00 | 0,69 | 0,03 |
| STM2432 | ptsI | 1,14 | 0,02 | 0,64 | 0,01 |
| STM2433 | crr  | 1,51 | 0,03 | 1,25 | 0,08 |
| STM2473 | talA | 1,07 | 0,08 | 0,35 | 0,04 |
| STM2474 | tktB | 1,07 | 0,06 | 0,83 | 0,02 |
| STM2492 |      | 2,16 | 0,07 | 0,28 | 0,02 |
| STM2546 | suhB | 1,18 | 0,08 | 0,69 | 0,08 |
| STM2554 | hcaT | 0,92 | 0,08 | 1,54 | 0,06 |
| STM2570 |      | 0,81 | 0,05 | 1,40 | 0,07 |
| STM2574 |      | 1,18 | 0,02 | 0,58 | 0,01 |
| STM2654 | kgtP | 1,78 | 0,06 | 1,53 | 0,06 |
| STM2668 |      | 1,33 | 0,01 | 0,57 | 0,04 |
| STM2750 |      | 0,67 | 0,05 | 1,77 | 0,07 |
| STM2751 |      | 0,79 | 0,01 | 1,39 | 0,07 |
| STM2752 |      | 0,51 | 0,02 | 1,24 | 0,08 |
| STM2755 |      | 0,74 | 0,00 | 1,50 | 0,06 |
| STM2757 |      | 3,69 | 0,02 | 0,14 | 0,01 |
| STM2758 |      | 0,66 | 0,05 | 1,60 | 0,07 |
| STM2773 | iroB | 0,96 | 0,08 | 1,20 | 0,05 |
| STM2815 | emrB | 0,83 | 0,07 | 0,74 | 0,07 |
| STM2832 | srIA | 1,01 | 0,10 | 1,49 | 0,04 |
| STM2833 | srIE | 0,70 | 0,02 | 0,88 | 0,09 |
| STM2834 | srIB | 0,89 | 0,05 | 0,98 | 0,10 |
| STM2911 |      | 1,09 | 0,08 | 1,19 | 0,08 |
| STM2913 |      | 0,65 | 0,05 | 2,34 | 0,05 |
| STM2915 | ygbM | 0,77 | 0,01 | 1,52 | 0,06 |
| STM2916 | ygbL | 0,85 | 0,03 | 4,90 | 0,03 |
| STM2952 | eno  | 1,18 | 0,04 | 0,34 | 0,00 |
| STM2959 |      | 1,24 | 0,02 | 0,53 | 0,05 |

|         |      |      |      |      |      |
|---------|------|------|------|------|------|
| STM2962 | gudT | 1,87 | 0,05 | 1,88 | 0,04 |
| STM2974 | fucA | 1,00 | 0,10 | 0,50 | 0,01 |
| STM2976 | fucI | 0,72 | 0,02 | 1,51 | 0,06 |
| STM2977 | fucK | 0,80 | 0,04 | 0,23 | 0,00 |
| STM2978 | fucU | 2,08 | 0,00 | 2,29 | 0,04 |
| STM3009 | ygeD | 1,06 | 0,05 | 0,33 | 0,03 |
| STM3016 | araE | 1,02 | 0,09 | 2,60 | 0,04 |
| STM3018 | kduI | 0,96 | 0,05 | 0,65 | 0,02 |
| STM3051 | bglA | 0,79 | 0,02 | 0,97 | 0,04 |
| STM3068 | fba  | 0,92 | 0,06 | 0,61 | 0,00 |
| STM3069 | pgk  | 1,01 | 0,09 | 1,40 | 0,08 |
| STM3076 | tktA | 1,13 | 0,05 | 0,76 | 0,03 |
| STM3083 |      | 1,05 | 0,09 | 1,15 | 0,06 |
| STM3091 | galP | 1,13 | 0,08 | 2,51 | 0,04 |
| STM3113 | nupG | 9,18 | 0,01 | 7,38 | 0,00 |
| STM3120 |      | 1,23 | 0,06 | 1,19 | 0,07 |
| STM3132 |      | 0,41 | 0,05 | 0,36 | 0,00 |
| STM3134 |      | 0,42 | 0,00 | 1,08 | 0,05 |
| STM3136 |      | 0,33 | 0,04 | 1,60 | 0,05 |
| STM3137 |      | 0,17 | 0,00 | 2,02 | 0,02 |
| STM3169 |      | 0,88 | 0,06 | 1,22 | 0,02 |
| STM3170 |      | 0,77 | 0,02 | 0,80 | 0,03 |
| STM3171 | ygiK | 0,75 | 0,00 | 1,62 | 0,06 |
| STM3247 | garK | 0,88 | 0,05 | 0,89 | 0,06 |
| STM3249 | garL | 0,23 | 0,01 | 1,40 | 0,01 |
| STM3250 | garD | 0,57 | 0,06 | 1,52 | 0,05 |
| STM3251 |      | 0,77 | 0,01 | 0,80 | 0,06 |
| STM3253 |      | 0,70 | 0,00 | 3,50 | 0,02 |
| STM3254 |      | 0,60 | 0,04 | 9,99 | 0,02 |
| STM3255 |      | 0,50 | 0,03 | 1,27 | 0,08 |
| STM3256 |      | 0,79 | 0,08 | 0,47 | 0,04 |
| STM3257 |      | 3,61 | 0,02 | 0,17 | 0,01 |
| STM3258 |      | 0,54 | 0,03 | 1,77 | 0,07 |
| STM3259 |      | 0,97 | 0,09 | 1,32 | 0,01 |
| STM3260 |      | 1,10 | 0,08 | 1,30 | 0,07 |
| STM3266 | yraO | 1,79 | 0,01 | 1,44 | 0,06 |
| STM3294 | mrsA | 1,14 | 0,07 | 1,00 | 0,10 |
| STM3322 | ptsN | 1,18 | 0,03 | 0,83 | 0,01 |
| STM3324 | ptsO | 0,81 | 0,07 | 1,05 | 0,10 |
| STM3335 | yhcH | 0,92 | 0,05 | 0,57 | 0,00 |
| STM3337 | nanE | 1,21 | 0,08 | 1,04 | 0,10 |
| STM3338 | nanT | 0,11 | 0,01 | 0,98 | 0,10 |
| STM3473 | yhfC | 0,92 | 0,09 | 1,83 | 0,01 |
| STM3483 | rpe  | 1,01 | 0,09 | 0,75 | 0,01 |
| STM3512 | gntT | 0,42 | 0,04 | 1,17 | 0,09 |
| STM3534 | glgP | 3,08 | 0,03 | 0,12 | 0,01 |

|         |      |      |      |       |      |
|---------|------|------|------|-------|------|
| STM3535 | glgA | 0,81 | 0,04 | 1,29  | 0,08 |
| STM3537 | glgX | 0,67 | 0,06 | 0,95  | 0,10 |
| STM3538 | glgB | 0,75 | 0,04 | 0,74  | 0,07 |
| STM3541 | gntU | 0,49 | 0,02 | 1,23  | 0,08 |
| STM3542 | gntK | 3,42 | 0,02 | 0,17  | 0,01 |
| STM3547 |      | 1,02 | 0,09 | 1,36  | 0,01 |
| STM3554 | ugpC | 0,96 | 0,10 | 0,66  | 0,04 |
| STM3555 | ugpE | 0,94 | 0,09 | 0,39  | 0,01 |
| STM3556 | ugpA | 0,93 | 0,08 | 1,26  | 0,01 |
| STM3557 | ugpB | 2,17 | 0,03 | 2,00  | 0,05 |
| STM3581 | yhhS | 0,66 | 0,04 | 17,13 | 0,00 |
| STM3600 |      | 0,74 | 0,04 | 0,56  | 0,02 |
| STM3603 | treF | 0,90 | 0,06 | 0,66  | 0,01 |
| STM3609 | yhjE | 1,06 | 0,07 | 0,82  | 0,04 |
| STM3612 | kdgK | 0,89 | 0,07 | 0,68  | 0,07 |
| STM3617 | bcsC | 0,24 | 0,02 | 5,98  | 0,01 |
| STM3660 | xylB | 0,82 | 0,02 | 0,52  | 0,04 |
| STM3661 | xylA | 1,07 | 0,07 | 1,18  | 0,08 |
| STM3664 | malS | 1,04 | 0,09 | 1,42  | 0,04 |
| STM3669 | yaL  | 0,51 | 0,04 | 3,12  | 0,02 |
| STM3671 | yaM  | 3,47 | 0,02 | 0,14  | 0,01 |
| STM3672 | yaN  | 1,05 | 0,07 | 1,38  | 0,06 |
| STM3673 | yaO  | 0,95 | 0,07 | 2,75  | 0,05 |
| STM3674 | lyxK | 1,19 | 0,08 | 0,82  | 0,08 |
| STM3676 | sgbU | 1,09 | 0,07 | 1,41  | 0,04 |
| STM3685 | mtIA | 1,12 | 0,03 | 0,74  | 0,01 |
| STM3686 | mtID | 1,02 | 0,09 | 0,62  | 0,00 |
| STM3698 |      | 0,80 | 0,01 | 0,84  | 0,08 |
| STM3704 | pmgI | 1,40 | 0,01 | 1,32  | 0,07 |
| STM3750 | yicJ | 1,00 | 0,10 | 1,16  | 0,06 |
| STM3765 | yicL | 2,02 | 0,04 | 1,17  | 0,05 |
| STM3769 |      | 0,57 | 0,03 | 1,49  | 0,08 |
| STM3770 |      | 3,38 | 0,02 | 0,13  | 0,01 |
| STM3771 |      |      |      |       |      |
| STM3772 |      | 0,27 |      | 4,21  | 0,05 |
| STM3775 |      | 4,39 | 0,03 | 0,38  | 0,03 |
| STM3776 | yicM | 1,15 | 0,03 | 2,27  | 0,05 |
| STM3779 |      | 0,72 | 0,00 | 1,48  | 0,07 |
| STM3780 |      | 0,92 | 0,08 | 1,44  | 0,07 |
| STM3781 |      | 0,65 | 0,06 | 1,31  | 0,08 |
| STM3782 |      | 0,85 | 0,09 | 0,70  | 0,07 |
| STM3783 |      | 0,16 | 0,03 | 10,40 | 0,00 |
| STM3784 |      | 1,92 | 0,05 | 0,30  | 0,02 |
| STM3787 | uhpT | 0,78 | 0,01 | 0,54  | 0,00 |
| STM3788 | uhpC | 1,00 | 0,10 | 1,21  | 0,04 |
| STM3792 |      | 0,48 | 0,04 | 0,18  | 0,01 |

|         |      |             |             |             |             |
|---------|------|-------------|-------------|-------------|-------------|
| STM3793 |      | 1,36        | 0,05        | <b>2,28</b> | <b>0,03</b> |
| STM3798 | emrD | 1,10        | 0,08        | 0,55        | 0,00        |
| STM3801 | dsdX | 1,03        | 0,10        | <b>0,32</b> | <b>0,01</b> |
| STM3825 | torT | 0,72        | 0,03        | 1,31        | 0,07        |
| STM3827 | dgoT | 0,90        | 0,07        | 1,32        | 0,01        |
| STM3829 | dgoK | 0,77        | 0,05        | 0,74        | 0,04        |
| STM3832 |      | 0,80        | 0,02        | 0,80        | 0,02        |
| STM3847 | yidY | <b>0,13</b> | <b>0,02</b> | 1,11        | 0,09        |
| STM3858 |      | 1,11        | 0,01        | 1,33        | 0,02        |
| STM3881 | rbsD | 0,77        | 0,01        | 0,79        | 0,08        |
| STM3882 | rbsA | 1,02        | 0,09        | 1,54        | 0,01        |
| STM3883 | rbsC | 0,66        | 0,02        | <b>4,29</b> | <b>0,01</b> |
| STM3884 | rbsB | 0,95        | 0,08        | 0,65        | 0,00        |
| STM3885 | rbsK | 1,99        | 0,06        | 0,89        | 0,07        |
| STM3887 | yieO | 1,26        | 0,08        | 1,41        | 0,08        |
| STM3963 | yigM | 0,70        | 0,00        | 1,11        | 0,08        |
| STM4017 | yihO | 1,11        | 0,08        | 1,20        | 0,08        |
| STM4018 | yihP | 0,77        | 0,01        | 1,08        | 0,07        |
| STM4019 | yihQ | 0,78        | 0,01        | 1,60        | 0,06        |
| STM4020 | yihR | 0,93        | 0,09        | <b>0,27</b> | <b>0,01</b> |
| STM4021 | yihS | 1,46        | 0,06        | <b>6,16</b> | <b>0,02</b> |
| STM4022 | yihT | 1,10        | 0,03        | 0,57        | 0,02        |
| STM4024 | yihV | 0,86        | 0,04        | 0,82        | 0,01        |
| STM4045 | rhaD | <b>3,64</b> | <b>0,02</b> | 0,57        | 0,05        |
| STM4046 | rhaA | 1,87        | 0,03        | 1,42        | 0,04        |
| STM4047 | rhaB | 0,99        | 0,09        | <b>2,53</b> | <b>0,01</b> |
| STM4050 | rhaT | 0,60        | 0,01        | 0,72        | 0,02        |
| STM4052 |      | <b>0,11</b> | <b>0,00</b> | <b>2,32</b> | <b>0,00</b> |
| STM4053 |      | 0,60        | 0,04        | <b>5,48</b> | <b>0,02</b> |
| STM4054 |      | 0,82        | 0,05        | 0,66        | 0,02        |
| STM4062 | pfkA | 0,86        | 0,04        | 0,65        | 0,01        |
| STM4065 |      | 0,97        | 0,07        | 0,55        | 0,02        |
| STM4066 |      | 1,12        | 0,05        | <b>2,45</b> | <b>0,04</b> |
| STM4072 | ydeV | <b>0,27</b> | <b>0,01</b> | <b>0,31</b> | <b>0,02</b> |
| STM4074 | ego  | <b>2,08</b> | <b>0,00</b> | <b>4,74</b> | <b>0,01</b> |
| STM4076 | ydeZ | 1,03        | 0,08        | <b>2,10</b> | <b>0,05</b> |
| STM4077 | yneA | 0,76        | 0,01        | 0,74        | 0,06        |
| STM4078 | yneB | 0,65        | 0,01        | 1,21        | 0,01        |
| STM4080 |      | 0,53        | 0,00        | 0,75        | 0,02        |
| STM4081 | tpiA | 1,19        | 0,04        | 0,62        | 0,06        |
| STM4085 | glpX | 0,85        | 0,02        | 1,00        | 0,10        |
| STM4087 | glpF | 0,89        | 0,06        | 0,67        | 0,01        |
| STM4109 | talC | <b>0,25</b> | <b>0,01</b> | 1,40        | 0,04        |
| STM4110 | ptsA | 1,23        | 0,06        | 1,09        | 0,09        |
| STM4112 | frwC | <b>2,65</b> | <b>0,00</b> | 1,13        | 0,07        |
| STM4113 | frwB |             |             | <b>0,32</b> | <b>0,02</b> |

|         |      |             |             |             |             |
|---------|------|-------------|-------------|-------------|-------------|
| STM4116 | frwD | 0,69        | 0,05        | 0,78        | 0,01        |
| STM4221 | pgi  | 1,06        | 0,08        | 0,65        | 0,01        |
| STM4227 | malG | 1,03        | 0,09        | <b>0,44</b> | <b>0,01</b> |
| STM4228 | malF | 0,98        | 0,09        | 0,67        | 0,03        |
| STM4229 | malE | <b>0,16</b> | <b>0,03</b> | <b>2,30</b> | <b>0,05</b> |
| STM4230 | malK | 1,24        | 0,04        | 1,05        | 0,08        |
| STM4290 | proP | 0,99        | 0,09        | 0,69        | 0,03        |
| STM4298 | melA | <b>5,79</b> | <b>0,04</b> | 1,20        | 0,04        |
| STM4299 | melB | 0,80        | 0,02        | 1,36        | 0,07        |
| STM4384 | sgaB | <b>2,60</b> | <b>0,00</b> | <b>2,13</b> | <b>0,04</b> |
| STM4385 | ptxA | 0,95        | 0,07        | <b>0,44</b> | <b>0,00</b> |
| STM4386 | sgaH | 1,01        | 0,10        | 1,17        | 0,02        |
| STM4387 | sgaU | 1,03        | 0,09        | 1,50        | 0,07        |
| STM4388 | sgaE | 0,91        | 0,09        | 1,73        | 0,05        |
| STM4395 | yifZ | 1,31        | 0,06        | 1,78        | 0,04        |
| STM4400 | ytff | 1,69        | 0,04        | 1,37        | 0,07        |
| STM4412 |      | 0,59        | 0,07        | 1,00        | 0,10        |
| STM4415 | fbp  | <b>3,46</b> | <b>0,03</b> | <b>0,12</b> | <b>0,01</b> |
| STM4418 |      | <b>2,26</b> | <b>0,00</b> | <b>2,37</b> | <b>0,04</b> |
| STM4419 |      | 1,05        | 0,08        | 1,20        | 0,01        |
| STM4420 |      | 0,97        | 0,10        | 0,99        | 0,10        |
| STM4424 |      | 0,77        | 0,03        | 0,72        | 0,01        |
| STM4427 |      | 0,52        | 0,03        | 1,20        | 0,02        |
| STM4428 |      | <b>2,80</b> | <b>0,01</b> | 0,67        | 0,01        |
| STM4430 |      | 0,70        | 0,03        | 0,60        | 0,02        |
| STM4434 |      | 1,01        | 0,09        | 0,73        | 0,05        |
| STM4435 |      | 1,14        | 0,04        | <b>2,15</b> | <b>0,05</b> |
| STM4436 |      | 0,79        | 0,01        | 1,43        | 0,04        |
| STM4448 |      | 1,52        | 0,05        | 0,70        | 0,05        |
| STM4453 | treC | 0,91        | 0,06        | <b>2,97</b> | <b>0,03</b> |
| STM4468 | yjgK | 0,80        | 0,02        | 0,75        | 0,01        |
| STM4482 | idnT | 0,56        | 0,07        | 0,70        | 0,07        |
| STM4485 | idnK | 1,17        | 0,04        | <b>2,08</b> | <b>0,05</b> |
| STM4515 | yjiJ | 0,53        | 0,02        | 1,15        | 0,09        |
| STM4517 | yjiO | 0,89        | 0,09        | 1,44        | 0,02        |
| STM4535 |      | 1,10        | 0,08        | 0,96        | 0,09        |
| STM4536 |      | 1,11        | 0,07        | 1,14        | 0,07        |
| STM4537 |      | 1,02        | 0,09        | 0,73        | 0,04        |
| STM4538 |      | 1,02        | 0,08        | <b>0,43</b> | <b>0,01</b> |
| STM4569 | deoB | 1,25        | 0,02        | 0,65        | 0,02        |
| STM4585 | gpmB | 1,10        | 0,09        | 0,86        | 0,08        |

#### Cell motility and secretion

|         |      |      |      |             |             |
|---------|------|------|------|-------------|-------------|
| STM0021 | bcfA | 1,00 | 0,10 | <b>0,14</b> | <b>0,00</b> |
| STM0022 | bcfB | 1,02 | 0,09 | 1,67        | 0,06        |
| STM0023 | bcfC | 0,80 | 0,01 | <b>7,46</b> | <b>0,02</b> |



|         |      |       |      |      |      |
|---------|------|-------|------|------|------|
| STM0024 | bcfD | 0,39  | 0,00 | 2,02 | 0,04 |
| STM0025 | bcfE | 0,72  | 0,01 | 1,54 | 0,04 |
| STM0026 | bcfF | 0,23  | 0,03 | 0,18 | 0,00 |
| STM0027 | bcfG | 1,08  | 0,05 | 0,59 | 0,01 |
| STM0142 | hofC | 2,07  | 0,00 | 2,59 | 0,03 |
| STM0143 | hofB | 0,77  | 0,01 | 1,57 | 0,04 |
| STM0144 | ppdD | 1,05  | 0,08 | 0,69 | 0,01 |
| STM0144 | ppdD |       |      |      |      |
| STM0174 | stiH | 0,43  | 0,04 | 0,35 | 0,02 |
| STM0175 | stiC |       |      |      |      |
| STM0176 | stiB | 1,07  | 0,05 | 0,49 | 0,02 |
| STM0177 | stiA | 1,06  | 0,07 | 1,03 | 0,10 |
| STM0195 | stfA | 2,33  | 0,00 | 2,68 | 0,03 |
| STM0196 | stfC | 0,74  | 0,01 | 1,24 | 0,07 |
| STM0197 | stfD | 0,98  | 0,09 | 1,21 | 0,03 |
| STM0198 | stfE | 0,84  | 0,04 | 0,75 | 0,01 |
| STM0199 | stfF | 0,72  | 0,03 | 0,56 | 0,02 |
| STM0200 | stfG | 0,90  | 0,07 | 0,80 | 0,03 |
| STM0300 | safB | 1,98  | 0,01 | 2,37 | 0,04 |
| STM0301 | safC | 1,02  | 0,10 | 1,58 | 0,02 |
| STM0336 | stbE | 0,88  | 0,08 | 0,74 | 0,05 |
| STM0338 | stbC | 0,52  | 0,02 | 6,27 | 0,00 |
| STM0339 | stbB | 1,04  | 0,07 | 8,45 | 0,02 |
| STM0340 | stbA | 0,64  | 0,02 | 0,90 | 0,09 |
| STM0543 | fimA | 1,05  | 0,02 | 0,66 | 0,01 |
| STM0544 | fimI | 8,45  | 0,01 | 1,14 | 0,09 |
| STM0545 | fimC |       |      | 0,57 | 0,05 |
| STM0546 | fimD | 0,93  | 0,06 | 3,41 | 0,01 |
| STM0548 | fimF | 0,96  | 0,08 | 0,70 | 0,02 |
| STM1171 | flgN | 0,10  | 0,00 | 4,35 | 0,01 |
| STM1173 | flgA | 2,46  | 0,04 | 0,65 | 0,03 |
| STM1174 | flgB | 20,72 |      | 0,53 | 0,02 |
| STM1175 | flgC | 1,13  | 0,04 | 0,68 | 0,03 |
| STM1176 | flgD | 0,76  | 0,01 | 1,62 | 0,03 |
| STM1177 | flgE | 0,86  | 0,02 | 3,33 | 0,01 |
| STM1178 | flgF | 1,13  | 0,04 | 0,62 | 0,02 |
| STM1179 | flgG | 0,88  | 0,04 | 2,55 | 0,05 |
| STM1180 | flgH | 4,02  | 0,02 | 1,79 | 0,06 |
| STM1181 | flgI | 1,10  | 0,04 | 0,66 | 0,02 |
| STM1183 | flgK | 0,79  | 0,02 | 0,61 | 0,00 |
| STM1184 | flgL | 0,94  | 0,10 | 0,58 | 0,06 |
| STM1394 | ssaC | 1,31  | 0,06 | 1,90 | 0,06 |
| STM1415 | ssaN | 0,51  | 0,00 | 0,55 | 0,02 |
| STM1626 | trg  | 1,08  | 0,07 | 1,44 | 0,04 |
| STM1657 |      | 1,57  | 0,01 | 3,72 | 0,04 |
| STM1915 | cheZ | 0,63  | 0,01 | 1,72 | 0,06 |

|         |      |      |      |      |      |
|---------|------|------|------|------|------|
| STM1917 | cheB | 0,69 | 0,01 | 0,45 | 0,03 |
| STM1918 | cheR | 0,66 | 0,02 | 0,80 | 0,00 |
| STM1920 | cheW | 0,92 | 0,10 | 0,42 | 0,03 |
| STM1921 | cheA | 1,01 | 0,10 | 0,54 | 0,01 |
| STM1922 | motB | 3,76 | 0,02 | 0,17 | 0,01 |
| STM1923 | motA | 1,04 | 0,09 | 1,59 | 0,06 |
| STM1959 | fliC | 0,74 | 0,01 | 0,72 | 0,03 |
| STM1960 | fliD | 0,79 | 0,04 | 0,62 | 0,07 |
| STM1968 | fliE |      |      | 2,37 | 0,00 |
| STM1969 | fliF |      |      | 0,39 | 0,00 |
| STM1970 | fliG | 0,84 | 0,03 | 7,18 | 0,02 |
| STM1971 | fliH | 0,54 | 0,00 | 0,49 | 0,01 |
| STM1972 | fliI | 1,00 | 0,10 | 2,06 | 0,00 |
| STM1973 | fliJ | 0,96 | 0,09 | 1,43 | 0,04 |
| STM1974 | fliK | 1,04 | 0,08 | 0,69 | 0,03 |
| STM1975 | fliL | 0,93 | 0,04 | 1,02 | 0,09 |
| STM1976 | fliM | 0,30 | 0,00 | 3,29 | 0,01 |
| STM1977 | fliN | 2,05 | 0,05 | 1,68 | 0,03 |
| STM1978 | fliO | 1,74 | 0,05 | 0,34 | 0,02 |
| STM1979 | fliP | 0,50 | 0,04 | 3,09 | 0,03 |
| STM1980 | fliQ | 0,50 | 0,02 | 0,97 | 0,09 |
| STM1981 | fliR | 1,10 | 0,08 | 1,17 | 0,09 |
| STM2150 | stcC | 0,94 | 0,09 | 1,20 | 0,08 |
| STM2151 | stcB | 1,05 | 0,05 | 0,45 | 0,02 |
| STM2152 | stcA | 0,32 | 0,00 | 2,11 | 0,03 |
| STM2771 | fljB | 0,90 | 0,00 | 0,81 | 0,04 |
| STM2887 | spaS | 0,87 | 0,07 | 1,63 | 0,04 |
| STM2894 | invC | 0,94 | 0,05 | 2,27 | 0,05 |
| STM2997 | ppdC | 0,73 | 0,00 | 2,52 | 0,02 |
| STM3000 | ppdA | 1,93 | 0,05 | 0,58 | 0,06 |
| STM3027 | stdC | 0,62 | 0,00 | 1,05 | 0,09 |
| STM3028 | stdB | 0,92 | 0,06 | 1,07 | 0,05 |
| STM3029 | stdA | 0,69 | 0,01 | 2,61 | 0,04 |
| STM3138 |      | 0,72 | 0,07 | 0,84 | 0,08 |
| STM3152 |      | 1,07 | 0,09 | 1,29 | 0,08 |
| STM3216 |      | 0,64 | 0,05 | 4,22 | 0,03 |
| STM3442 | hopD | 0,61 | 0,07 | 0,37 | 0,04 |
| STM3491 | yrfC | 1,11 | 0,09 | 0,54 | 0,05 |
| STM3636 | lpfE | 1,05 | 0,07 | 0,38 | 0,00 |
| STM3637 | lpfD | 1,82 | 0,05 | 0,42 | 0,01 |
| STM3638 | lpfC | 0,87 | 0,03 | 2,30 | 0,05 |
| STM3639 | lpfB | 0,99 | 0,10 | 1,15 | 0,07 |
| STM3640 | lpfA | 0,79 | 0,03 | 4,12 | 0,03 |
| STM4533 | tsr  | 0,33 | 0,02 | 2,48 | 0,03 |
| STM4572 | stjB | 0,26 | 0,00 | 1,39 | 0,07 |
| STM4573 | stjC | 1,11 | 0,08 | 1,09 | 0,09 |

|         |      |      |      |      |      |
|---------|------|------|------|------|------|
| STM4591 | sthE | 1,21 | 0,07 | 1,09 | 0,09 |
| STM4592 | sthD | 0,64 | 0,07 | 3,37 | 0,01 |
| STM4594 | sthA | 0,67 | 0,01 | 0,78 | 0,00 |

**Cell envelope biogenesis and OM**

|         |      |             |             |             |             |
|---------|------|-------------|-------------|-------------|-------------|
| STM0047 | lspA | 1,03        | 0,09        | 0,66        | 0,02        |
| STM0074 | caiT | 1,05        | 0,08        | 1,57        | 0,04        |
| STM0093 | imp  | 1,01        | 0,09        | 1,07        | 0,07        |
| STM0120 | yabC | 0,99        | 0,08        | 0,72        | 0,01        |
| STM0122 | ftsI | 0,64        | 0,01        | 0,77        | 0,03        |
| STM0123 | murE | 1,27        | 0,04        | 1,37        | 0,07        |
| STM0124 | murF | 1,01        | 0,09        | 0,75        | 0,01        |
| STM0125 | mraY | 0,92        | 0,07        | 0,65        | 0,01        |
| STM0126 | murD | 0,88        | 0,04        | 0,73        | 0,00        |
| STM0128 | murG | 0,92        | 0,04        | 0,68        | 0,01        |
| STM0129 | murC | 0,82        | 0,03        | 0,77        | 0,01        |
| STM0130 | ddlB | 1,09        | 0,03        | 0,63        | 0,03        |
| STM0131 | ftsQ | 1,16        | 0,04        | 0,58        | 0,01        |
| STM0134 | lpxC | 1,77        | 0,02        | 1,37        | 0,07        |
| STM0190 | mrcB | <b>2,67</b> | <b>0,00</b> | 0,74        | 0,05        |
| STM0223 | yaeL | 1,33        | 0,00        | 1,55        | 0,06        |
| STM0224 | yaeT | 1,23        | 0,00        | 0,77        | 0,03        |
| STM0225 | hlpA | 1,35        | 0,01        | 0,93        | 0,09        |
| STM0226 | lpxD | 1,21        | 0,03        | 0,69        | 0,03        |
| STM0228 | lpxA | 1,33        | 0,07        | 0,90        | 0,09        |
| STM0229 | lpxB | 1,01        | 0,08        | 1,18        | 0,00        |
| STM0260 | dniR | 1,19        | 0,00        | 1,02        | 0,10        |
| STM0292 |      | <b>2,10</b> | <b>0,01</b> | 0,64        | 0,07        |
| STM0306 |      | 1,19        | 0,08        | <b>2,76</b> | <b>0,03</b> |
| STM0320 | phoE | 0,87        | 0,08        | 0,98        | 0,10        |
| STM0346 |      | 0,84        | 0,04        | 0,62        | 0,03        |
| STM0350 |      | 1,13        | 0,08        | 1,17        | 0,09        |
| STM0352 |      | <b>3,65</b> | <b>0,02</b> | <b>0,14</b> | <b>0,01</b> |
| STM0373 | yaiU | 0,68        | 0,03        | 1,24        | 0,06        |
| STM0380 | ddlA | 1,43        | 0,02        | <b>0,50</b> | <b>0,05</b> |
| STM0413 | tsx  | 0,75        | 0,02        | <b>0,45</b> | <b>0,00</b> |
| STM0445 | yajG | 1,44        | 0,01        | 1,15        | 0,07        |
| STM0476 | acrA | <b>3,53</b> | <b>0,03</b> | <b>0,12</b> | <b>0,01</b> |
| STM0509 |      | <b>0,43</b> | <b>0,01</b> | 1,48        | 0,07        |
| STM0558 | yfdH | <b>0,36</b> | <b>0,04</b> | 1,16        | 0,08        |
| STM0569 | ybdG | 0,62        | 0,01        | 0,87        | 0,04        |
| STM0572 |      | <b>0,23</b> | <b>0,03</b> | 0,71        | 0,07        |
| STM0573 |      | 1,31        | 0,01        | 0,61        | 0,05        |
| STM0589 | fepE | 0,88        | 0,04        | 0,87        | 0,07        |
| STM0637 | dacA | <b>2,30</b> | <b>0,01</b> | 1,19        | 0,05        |

|         |      |      |      |      |      |
|---------|------|------|------|------|------|
| STM0640 | mrda | 0,12 | 0,02 | 2,08 | 0,04 |
| STM0647 | rlpB | 1,02 | 0,09 | 0,84 | 0,05 |
| STM0666 | Int  | 1,50 | 0,00 | 1,91 | 0,02 |
| STM0719 |      | 2,20 | 0,00 | 2,22 | 0,04 |
| STM0721 |      | 0,86 | 0,06 | 1,36 | 0,02 |
| STM0725 |      | 0,36 | 0,00 | 2,06 | 0,04 |
| STM0747 | tolA | 0,58 | 0,05 | 1,03 | 0,10 |
| STM0749 | pal  | 1,01 | 0,09 | 0,63 | 0,00 |
| STM0749 | pal  |      |      |      |      |
| STM0776 | galE | 0,85 | 0,00 | 0,50 | 0,00 |
| STM0818 |      | 1,35 | 0,02 | 0,88 | 0,06 |
| STM0827 | ybiO | 1,26 | 0,07 | 0,68 | 0,05 |
| STM0833 | ompX | 1,39 | 0,06 | 0,64 | 0,06 |
| STM0863 | dacC | 1,13 | 0,02 | 0,79 | 0,02 |
| STM0920 |      |      |      |      |      |
| STM0932 |      | 0,90 | 0,01 | 0,83 | 0,07 |
| STM0933 | ybjT | 0,85 | 0,08 | 0,56 | 0,01 |
| STM0941 | ybjY | 1,08 | 0,06 | 0,69 | 0,02 |
| STM0961 | lolA | 0,89 | 0,07 | 0,77 | 0,08 |
| STM0985 | lpxK | 0,59 | 0,05 | 1,42 | 0,06 |
| STM0988 | kdsB | 0,89 | 0,08 | 0,76 | 0,08 |
| STM1043 |      | 0,68 | 0,02 | 1,06 | 0,09 |
| STM1070 | ompA | 5,10 | 0,02 | 0,12 | 0,01 |
| STM1139 | csgG | 0,81 | 0,06 | 1,44 | 0,05 |
| STM1151 | mdoH |      |      |      |      |
| STM1155 | htrB | 0,58 | 0,06 | 1,89 | 0,04 |
| STM1182 | flgJ | 0,84 | 0,02 | 6,84 | 0,02 |
| STM1208 | ycfN | 0,83 | 0,03 | 0,50 | 0,01 |
| STM1217 | ycfU | 1,56 | 0,02 | 1,69 | 0,01 |
| STM1219 | ycfW | 0,61 | 0,00 | 1,10 | 0,07 |
| STM1246 | pagC | 1,54 | 0,00 | 0,79 | 0,08 |
| STM1260 |      | 0,82 | 0,03 | 1,02 | 0,09 |
| STM1286 | mipA | 1,27 | 0,04 | 1,26 | 0,08 |
| STM1327 | ydiY | 1,32 | 0,01 | 4,27 | 0,00 |
| STM1343 | nlpC | 0,91 | 0,06 | 0,89 | 0,08 |
| STM1376 | lppB | 1,12 | 0,09 | 0,76 | 0,08 |
| STM1377 | lpp  | 0,75 | 0,02 | 0,67 | 0,02 |
| STM1427 | cfa  | 1,10 | 0,03 | 0,65 | 0,01 |
| STM1432 | ydhO | 1,42 | 0,03 | 1,27 | 0,08 |
| STM1445 | slyB | 0,90 | 0,04 | 0,53 | 0,01 |
| STM1473 | ompN | 0,12 | 0,01 | 1,27 | 0,08 |
| STM1493 |      | 0,91 | 0,06 | 0,71 | 0,07 |
| STM1505 | rspA | 1,06 | 0,09 | 1,35 | 0,07 |
| STM1530 |      | 3,34 | 0,02 | 0,20 | 0,01 |
| STM1540 |      | 1,17 | 0,06 | 0,65 | 0,05 |
| STM1572 | nmpC | 1,07 | 0,02 | 0,73 | 0,01 |

|         |      |       |      |       |      |
|---------|------|-------|------|-------|------|
| STM1590 | yncA | 1,40  | 0,06 | 0,84  | 0,08 |
| STM1599 | pdgL | 1,24  | 0,01 | 0,95  | 0,08 |
| STM1663 | ynal | 2,68  | 0,03 | 0,75  | 0,07 |
| STM1681 | ycjG | 0,41  | 0,05 | 1,55  | 0,08 |
| STM1732 | ompW | 0,79  | 0,01 | 0,91  | 0,04 |
| STM1737 | tonB | 2,10  | 0,00 | 3,21  | 0,03 |
| STM1752 | galU | 1,32  | 0,04 | 1,56  | 0,06 |
| STM1772 | kdsA | 1,61  | 0,02 | 1,32  | 0,07 |
| STM1778 | lolB | 1,00  | 0,10 | 0,53  | 0,01 |
| STM1799 | emtA | 1,06  | 0,03 | 0,90  | 0,05 |
| STM1802 | dadX | 1,15  | 0,05 | 0,62  | 0,00 |
| STM1819 | slp  | 0,72  | 0,03 | 1,56  | 0,00 |
| STM1836 |      | 0,31  | 0,00 | 6,03  | 0,01 |
| STM1845 | prc  | 1,31  | 0,00 | 0,31  | 0,02 |
| STM1889 | msbB | 1,52  | 0,02 | 0,37  | 0,01 |
| STM1890 | yebA | 0,92  | 0,09 | 1,19  | 0,02 |
| STM1910 |      | 2,74  | 0,03 | 0,15  | 0,01 |
| STM1940 |      | 2,54  | 0,02 | 17,97 | 0,01 |
| STM2062 | dacD | 1,37  | 0,06 | 1,88  | 0,01 |
| STM2070 | yeeZ | 0,96  | 0,09 | 1,29  | 0,08 |
| STM2079 | wzzB | 1,08  | 0,06 | 0,73  | 0,04 |
| STM2080 | udg  | 1,46  | 0,05 | 0,65  | 0,02 |
| STM2082 | rfbP | 0,64  | 0,04 | 1,00  | 0,10 |
| STM2084 | rfbM | 0,55  | 0,07 | 1,19  | 0,06 |
| STM2085 | rfbN | 2,55  | 0,04 | 0,23  | 0,01 |
| STM2086 | rfbU | 11,86 | 0,00 | 0,19  | 0,03 |
| STM2087 | rfbV | 0,82  | 0,09 | 0,27  | 0,00 |
| STM2089 | rfbJ | 0,73  | 0,00 | 1,20  | 0,05 |
| STM2090 | rfbH | 0,92  | 0,01 | 0,78  | 0,02 |
| STM2091 | rfbG | 1,22  | 0,01 | 0,61  | 0,00 |
| STM2092 | rfbF | 0,96  | 0,08 | 1,15  | 0,08 |
| STM2094 | rfbC | 1,19  | 0,01 | 0,77  | 0,02 |
| STM2095 | rfbA | 0,94  | 0,07 | 0,68  | 0,00 |
| STM2096 | rfbD | 0,70  | 0,06 | 0,26  | 0,01 |
| STM2097 | rfbB | 1,38  | 0,04 | 1,13  | 0,09 |
| STM2098 | galF | 1,02  | 0,09 | 0,84  | 0,07 |
| STM2100 | wcaL | 0,82  | 0,01 | 1,43  | 0,07 |
| STM2103 | wcaJ | 0,22  | 0,00 | 1,37  | 0,07 |
| STM2106 | wcaI | 1,08  | 0,09 | 3,06  | 0,00 |
| STM2108 | wcaG | 3,68  | 0,02 | 0,14  | 0,01 |
| STM2109 | gmd  | 1,07  | 0,05 | 0,51  | 0,02 |
| STM2113 | wcaC | 0,80  | 0,01 | 1,58  | 0,04 |
| STM2115 | wcaA | 1,23  | 0,08 | 0,92  | 0,07 |
| STM2116 | wzc  | 0,98  | 0,08 | 0,60  | 0,02 |
| STM2118 | wza  | 1,10  | 0,05 | 2,39  | 0,04 |
| STM2120 | asmA | 0,82  | 0,02 | 0,68  | 0,02 |

|         |      |      |      |       |      |
|---------|------|------|------|-------|------|
| STM2165 | yehZ | 1,50 | 0,05 | 0,92  | 0,09 |
| STM2168 | pbpG | 1,26 | 0,02 | 0,63  | 0,04 |
| STM2172 | yohG | 0,67 | 0,02 | 1,28  | 0,03 |
| STM2182 | yohK | 4,85 | 0,00 | 0,98  | 0,10 |
| STM2214 | spr  | 1,17 | 0,04 | 1,60  | 0,07 |
| STM2267 | ompC | 1,43 | 0,00 | 0,75  | 0,03 |
| STM2291 | yfaW | 0,31 | 0,00 | 1,18  | 0,08 |
| STM2297 | yfbE | 4,04 | 0,02 | 0,18  | 0,01 |
| STM2298 | pmrF | 0,66 | 0,07 | 0,37  | 0,01 |
| STM2299 | yfbG | 1,45 | 0,01 | 1,03  | 0,10 |
| STM2301 | pqaB | 1,88 | 0,04 | 1,68  | 0,07 |
| STM2383 | mepA | 0,99 | 0,08 | 0,52  | 0,02 |
| STM2392 | vacJ | 1,07 | 0,07 | 0,76  | 0,04 |
| STM2395 | pgtE | 1,04 | 0,08 | 1,17  | 0,08 |
| STM2401 | ddg  | 0,71 | 0,02 | 0,93  | 0,09 |
| STM2439 | yfeL | 0,39 | 0,03 | 0,49  | 0,05 |
| STM2450 | amiA | 3,94 | 0,03 | 1,15  | 0,09 |
| STM2488 | nlpB | 3,58 | 0,03 | 0,14  | 0,01 |
| STM2567 | yfhD | 0,50 | 0,04 | 0,70  | 0,07 |
| STM2591 |      | 1,02 | 0,09 | 1,29  | 0,01 |
| STM2690 |      | 0,40 | 0,01 | 6,04  | 0,00 |
| STM2692 |      | 1,02 | 0,08 | 0,76  | 0,08 |
| STM2756 |      | 1,08 | 0,09 | 1,09  | 0,09 |
| STM2831 | mltB | 1,94 | 0,01 | 1,03  | 0,09 |
| STM2877 | iagB | 3,25 | 0,03 | 0,19  | 0,01 |
| STM2914 |      | 0,34 | 0,05 | 1,15  | 0,09 |
| STM2925 | nlpD | 1,38 | 0,06 | 0,76  | 0,08 |
| STM2960 | gudD | 0,83 | 0,02 | 18,73 | 0,00 |
| STM2961 | ygcY | 0,22 | 0,03 | 0,43  | 0,05 |
| STM2988 | mltA | 0,81 | 0,03 | 0,99  | 0,10 |
| STM2991 | amiC | 0,95 | 0,08 | 0,68  | 0,02 |
| STM3002 | lgt  | 0,49 | 0,04 | 0,95  | 0,09 |
| STM3015 | ygeA | 1,02 | 0,09 | 0,44  | 0,01 |
| STM3031 |      | 0,63 | 0,07 | 0,27  | 0,02 |
| STM3038 |      | 0,98 | 0,09 | 0,84  | 0,06 |
| STM3067 | yggB | 1,17 | 0,03 | 0,91  | 0,02 |
| STM3112 | mltC | 0,47 | 0,05 | 3,35  | 0,01 |
| STM3186 | tolC | 1,18 | 0,01 | 0,88  | 0,05 |
| STM3200 | rfaE | 1,08 | 0,05 | 0,60  | 0,01 |
| STM3268 | yraR | 3,12 | 0,07 | 0,67  | 0,07 |
| STM3300 | dacB | 1,66 | 0,01 | 0,53  | 0,04 |
| STM3307 | murA | 0,80 | 0,02 | 0,58  | 0,01 |
| STM3326 | mtgA | 0,87 | 0,08 | 3,03  | 0,02 |
| STM3372 | mreD | 2,19 | 0,05 | 1,28  | 0,07 |
| STM3390 | acrE | 0,70 | 0,02 | 1,99  | 0,00 |
| STM3410 | mscL | 0,83 | 0,08 | 1,89  | 0,06 |

|         |      |             |             |             |             |
|---------|------|-------------|-------------|-------------|-------------|
| STM3587 | yhil | 0,72        | 0,01        | 0,64        | 0,01        |
| STM3601 |      | 1,08        | 0,05        | <b>2,07</b> | <b>0,05</b> |
| STM3610 | yhjG | 0,99        | 0,10        | 0,51        | 0,00        |
| STM3645 | yiaD | 1,25        | 0,07        | 1,06        | 0,09        |
| STM3697 |      | 1,07        | 0,08        | 1,52        | 0,04        |
| STM3707 | yibD | 0,77        | 0,02        | 1,02        | 0,09        |
| STM3710 | rfaD | 0,82        | 0,08        | 1,18        | 0,09        |
| STM3711 | rfaF | 0,74        | 0,08        | 1,12        | 0,08        |
| STM3712 | rfaC | 0,59        | 0,01        | 0,63        | 0,05        |
| STM3713 | rfaL | <b>0,33</b> | <b>0,05</b> | 0,89        | 0,07        |
| STM3714 | rfaK | 0,55        | 0,04        | 1,30        | 0,07        |
| STM3717 | rfaJ | <b>3,31</b> | <b>0,03</b> | 1,61        | 0,05        |
| STM3718 | rfaI | 0,70        | 0,04        | 0,63        | 0,01        |
| STM3719 | rfaB | 1,20        | 0,01        | 1,09        | 0,07        |
| STM3722 | rfaG | 0,93        | 0,05        | 0,58        | 0,00        |
| STM3723 | rfaQ | 0,81        | 0,02        | 0,65        | 0,00        |
| STM3724 | kdtA | 1,43        | 0,02        | 0,88        | 0,07        |
| STM3757 | misL |             |             |             |             |
| STM3828 | dgoA | 0,88        | 0,09        | 1,35        | 0,07        |
| STM3833 |      | 0,84        | 0,05        | 0,68        | 0,02        |
| STM3861 | glmS | 0,92        | 0,07        | 1,43        | 0,08        |
| STM3862 | glmU | 0,93        | 0,07        | 0,84        | 0,06        |
| STM3873 | gidB | 0,98        | 0,09        | 1,18        | 0,04        |
| STM3918 | rfe  | 0,94        | 0,08        | 0,72        | 0,02        |
| STM3919 | wzzE | 0,76        | 0,04        | 1,42        | 0,05        |
| STM3920 | wecB | 0,82        | 0,05        | 1,32        | 0,08        |
| STM3921 | wecC | 0,69        | 0,03        | <b>0,42</b> | <b>0,01</b> |
| STM3922 | rffG | 0,78        | 0,04        | 0,74        | 0,02        |
| STM3923 | rffH | 0,64        | 0,01        | 1,12        | 0,08        |
| STM3925 | wecE | 0,65        | 0,03        | <b>0,41</b> | <b>0,01</b> |
| STM3929 | wecG | 0,63        | 0,02        | <b>0,35</b> | <b>0,01</b> |
| STM3957 | pldA | 0,81        | 0,00        | 0,91        | 0,06        |
| STM4102 |      | <b>2,27</b> | <b>0,05</b> | 1,73        | 0,03        |
| STM4137 | murB | 0,81        | 0,03        | 1,01        | 0,10        |
| STM4205 |      | 0,96        | 0,07        | <b>2,06</b> | <b>0,05</b> |
| STM4217 |      | 1,08        | 0,05        | 0,55        | 0,02        |
| STM4236 | dgkA | 0,84        | 0,01        | 1,00        | 0,10        |
| STM4247 | alr  | 0,60        | 0,01        | 0,56        | 0,01        |
| STM4259 |      | 0,99        | 0,09        | 0,55        | 0,02        |
| STM4260 |      | 1,12        | 0,03        | <b>2,97</b> | <b>0,04</b> |
| STM4272 |      | 1,43        | 0,02        | 1,22        | 0,08        |
| STM4339 | bIc  | 0,97        | 0,10        | 0,80        | 0,08        |
| STM4347 | yjeP | <b>0,41</b> | <b>0,02</b> | 0,99        | 0,10        |
| STM4358 | amiB | 0,99        | 0,10        | 1,41        | 0,07        |
| STM4396 | ytfB | <b>2,57</b> | <b>0,03</b> | <b>0,18</b> | <b>0,01</b> |
| STM4401 | ytfG | 0,95        | 0,08        | 1,25        | 0,01        |

|         |      |             |             |             |             |
|---------|------|-------------|-------------|-------------|-------------|
| STM4409 | ytfM | 1,33        | 0,02        | 1,31        | 0,07        |
| STM4416 | mpl  | 0,73        | 0,01        | 0,60        | 0,00        |
| STM4510 |      | 1,06        | 0,07        | 1,44        | 0,08        |
| STM4539 |      | 0,96        | 0,00        | 1,79        | 0,07        |
| STM4540 |      | <b>0,49</b> | <b>0,02</b> | <b>2,84</b> | <b>0,01</b> |
| STM4541 | mdoB | 0,28        |             | 0,62        | 0,06        |
| STM4582 | slt  | 0,75        | 0,08        | 0,67        | 0,03        |

### Coenzyme metabolism

|         |       |              |             |             |             |
|---------|-------|--------------|-------------|-------------|-------------|
| STM0008 | mog   | 0,75         | 0,02        | 1,24        | 0,03        |
| STM0045 | ribF  | 1,03         | 0,09        | 1,58        | 0,07        |
| STM0062 | citX2 | 1,12         | 0,03        | 0,79        | 0,05        |
| STM0063 | citG2 | 0,75         | 0,00        | 1,75        | 0,05        |
| STM0087 | folA  | 0,65         | 0,05        | 0,79        | 0,07        |
| STM0091 | pdxA  | 1,67         | 0,01        | 1,51        | 0,06        |
| STM0106 | yabJ  | 0,88         | 0,06        | 1,44        | 0,01        |
| STM0140 | yacE  | 1,20         | 0,05        | 1,63        | 0,06        |
| STM0145 | nadC  | 1,36         | 0,07        | 0,82        | 0,08        |
| STM0163 |       | <b>11,62</b> | <b>0,00</b> | 0,85        | 0,01        |
| STM0180 | panD  | 1,20         | 0,04        | 0,77        | 0,04        |
| STM0181 | panC  | <b>0,39</b>  | <b>0,00</b> | <b>9,80</b> | <b>0,00</b> |
| STM0182 | panB  | 1,68         | 0,04        | <b>2,68</b> | <b>0,02</b> |
| STM0183 | folK  | 1,12         | 0,05        | <b>4,06</b> | <b>0,02</b> |
| STM0202 | hemL  | 1,08         | 0,07        | 0,92        | 0,08        |
| STM0372 | hemB  | 0,83         | 0,08        | 1,00        | 0,10        |
| STM0416 | ribD  | 0,81         | 0,08        | 1,03        | 0,10        |
| STM0417 | ribH  | 0,82         | 0,06        | 0,77        | 0,08        |
| STM0422 | dxs   | 0,91         | 0,09        | 0,71        | 0,06        |
| STM0423 | ispA  | 1,11         | 0,03        | 0,88        | 0,06        |
| STM0434 | apbA  | 1,10         | 0,09        | <b>0,44</b> | <b>0,00</b> |
| STM0439 | cyoE  | 1,26         | 0,00        | 0,73        | 0,02        |
| STM0542 | folD  | 0,87         | 0,03        | 0,56        | 0,00        |
| STM0595 | entC  | <b>0,45</b>  | <b>0,02</b> | 1,90        | 0,05        |
| STM0619 | citG  | <b>0,44</b>  | <b>0,00</b> | 0,57        | 0,02        |
| STM0620 | citX  | 1,06         | 0,08        | 1,42        | 0,04        |
| STM0633 | lipA  | 1,16         | 0,03        | 0,72        | 0,02        |
| STM0635 | lipB  | 0,60         | 0,00        | <b>2,36</b> | <b>0,04</b> |
| STM0645 | nadD  | 0,98         | 0,09        | 1,82        | 0,06        |
| STM0671 | ubiF  | 0,92         | 0,03        | 0,81        | 0,01        |
| STM0756 | nadA  | 0,85         | 0,02        | 0,56        | 0,06        |
| STM0757 | pnuC  | 1,43         | 0,03        | 0,82        | 0,00        |
| STM0769 |       | 0,97         | 0,08        | 1,05        | 0,08        |
| STM0793 | bioA  | 0,90         | 0,07        | <b>0,48</b> | <b>0,00</b> |
| STM0794 | bioB  | 1,22         | 0,05        | 1,58        | 0,07        |
| STM0795 | bioF  | 1,00         | 0,10        | 0,74        | 0,02        |
| STM0797 | bioD  | 0,95         | 0,09        | 0,95        | 0,07        |



|         |      |      |      |       |      |
|---------|------|------|------|-------|------|
| STM0802 | moaA | 2,56 | 0,00 | 1,25  | 0,06 |
| STM0804 | moaC | 0,91 | 0,03 | 0,72  | 0,02 |
| STM0805 | moaD | 3,58 | 0,01 | 2,72  | 0,04 |
| STM0806 | moaE | 0,74 | 0,04 | 3,77  | 0,03 |
| STM0845 | moeB | 3,99 | 0,03 | 16,30 | 0,00 |
| STM0846 | moeA | 1,64 | 0,06 | 2,21  | 0,05 |
| STM0875 | rimK | 0,88 | 0,07 | 1,71  | 0,02 |
| STM0977 | serC | 1,04 | 0,08 | 0,97  | 0,08 |
| STM1004 | pncB | 0,73 | 0,02 | 0,74  | 0,02 |
| STM1310 | nadE | 0,98 | 0,07 | 0,73  | 0,01 |
| STM1340 | btuC | 0,89 | 0,05 | 20,78 | 0,00 |
| STM1342 | btuD | 0,97 | 0,09 | 0,83  | 0,07 |
| STM1426 | ribE | 1,09 | 0,05 | 0,94  | 0,09 |
| STM1448 | pdxH | 0,86 | 0,05 | 0,50  | 0,01 |
| STM1450 | pdxY | 1,02 | 0,09 | 0,56  | 0,02 |
| STM1489 | ynfK | 0,75 | 0,01 | 0,80  | 0,05 |
| STM1546 |      | 1,95 | 0,00 | 2,23  | 0,04 |
| STM1711 | ribA | 3,63 | 0,03 | 0,14  | 0,01 |
| STM1718 | btuR | 0,85 | 0,08 | 1,09  | 0,09 |
| STM1777 | hemA | 0,96 | 0,09 | 0,66  | 0,03 |
| STM2016 | cobT | 0,20 | 0,01 | 3,06  | 0,01 |
| STM2017 | cobS | 1,10 | 0,08 | 0,61  | 0,01 |
| STM2018 | cobU | 0,77 | 0,00 | 0,65  | 0,01 |
| STM2019 | cbiP | 1,47 | 0,01 | 0,69  | 0,08 |
| STM2024 | cbiL | 0,79 | 0,02 | 0,89  | 0,01 |
| STM2025 | cbiK | 1,39 | 0,02 | 1,26  | 0,08 |
| STM2026 | cbiJ | 2,51 | 0,02 | 0,19  | 0,00 |
| STM2027 | cbiH | 1,22 | 0,07 | 0,66  | 0,04 |
| STM2028 | cbiG | 1,04 | 0,07 | 0,84  | 0,08 |
| STM2029 | cbiF | 0,70 | 0,06 | 1,31  | 0,08 |
| STM2030 | cbiT | 3,22 | 0,02 | 0,14  | 0,00 |
| STM2031 | cbiE | 0,97 | 0,09 | 0,63  | 0,02 |
| STM2032 | cbiD | 1,19 | 0,04 | 0,82  | 0,08 |
| STM2033 | cbiC | 0,58 | 0,04 | 1,53  | 0,07 |
| STM2034 | cibB | 1,79 | 0,05 | 0,16  | 0,00 |
| STM2093 | rfbI | 1,00 | 0,10 | 0,72  | 0,07 |
| STM2146 | thiD | 1,26 | 0,08 | 0,62  | 0,00 |
| STM2147 | thiM | 1,98 | 0,07 | 1,74  | 0,06 |
| STM2175 |      | 6,52 | 0,00 | 0,41  | 0,05 |
| STM2193 | folE | 1,80 | 0,02 | 1,52  | 0,07 |
| STM2266 | apbE | 0,83 | 0,08 | 1,26  | 0,04 |
| STM2276 | ubiG | 0,55 | 0,01 | 1,29  | 0,04 |
| STM2306 | menC | 0,92 | 0,07 | 0,51  | 0,01 |
| STM2307 | menB | 1,04 | 0,08 | 0,65  | 0,01 |
| STM2310 | menF | 0,80 | 0,06 | 0,59  | 0,07 |
| STM2356 | ubiX | 0,90 | 0,07 | 0,50  | 0,01 |

|         |      |             |             |             |             |
|---------|------|-------------|-------------|-------------|-------------|
| STM2365 | folC | 0,97        | 0,09        | 0,76        | 0,00        |
| STM2435 | pdxK | <b>2,21</b> | <b>0,04</b> | 1,78        | 0,05        |
| STM2451 | hemF | 0,88        | 0,06        | 0,89        | 0,07        |
| STM2549 | asrB | <b>0,45</b> | <b>0,02</b> | 0,97        | 0,10        |
| STM2573 |      | 1,16        | 0,04        | 0,77        | 0,07        |
| STM2578 | pdxJ | 1,09        | 0,02        | 0,62        | 0,01        |
| STM2641 | nadB | 1,13        | 0,04        | <b>0,19</b> | <b>0,03</b> |
| STM2818 | gshA | 1,30        | 0,07        | 1,30        | 0,08        |
| STM2921 |      | 0,91        | 0,09        | 0,80        | 0,08        |
| STM2922 |      | <b>0,28</b> | <b>0,03</b> | <b>4,27</b> | <b>0,01</b> |
| STM2949 | ptpS | 1,29        | 0,07        | 0,98        | 0,10        |
| STM2987 | ygdL | 0,83        | 0,04        | 0,85        | 0,06        |
| STM3056 | visC | 1,31        | 0,01        | 0,79        | 0,04        |
| STM3057 | ubiH | 1,09        | 0,04        | 0,73        | 0,02        |
| STM3061 | ygfA | 0,96        | 0,08        | 1,32        | 0,07        |
| STM3090 | metK | 0,90        | 0,03        | 1,48        | 0,07        |
| STM3095 | gshB | 1,04        | 0,08        | 0,69        | 0,00        |
| STM3104 | yggW | 0,69        | 0,04        | 0,97        | 0,09        |
| STM3195 | ribB | 0,90        | 0,05        | 1,08        | 0,07        |
| STM3206 | folB | <b>0,32</b> | <b>0,01</b> | 0,75        | 0,06        |
| STM3295 | folP | 1,08        | 0,08        | 1,02        | 0,09        |
| STM3305 | ispB | 1,11        | 0,01        | 0,99        | 0,10        |
| STM3350 |      | 0,94        | 0,06        | <b>0,43</b> | <b>0,01</b> |
| STM3382 | panF | <b>2,45</b> | <b>0,03</b> | 0,94        | 0,06        |
| STM3477 | cysG | 1,11        | 0,06        | 0,71        | 0,01        |
| STM3583 | acpT | 1,01        | 0,09        | 1,84        | 0,00        |
| STM3709 | kbl  | 0,94        | 0,08        | 1,21        | 0,08        |
| STM3725 | kdtB | 1,53        |             | 0,63        |             |
| STM3730 | dfp  | 1,23        | 0,08        | 0,74        | 0,07        |
| STM3849 | yieE | 1,38        | 0,08        | 0,87        | 0,09        |
| STM3911 |      |             |             |             |             |
| STM3936 | hemX | 0,73        | 0,02        | 1,09        | 0,08        |
| STM3937 | hemD | 0,87        | 0,06        | 1,16        | 0,09        |
| STM3938 | hemC | 1,05        | 0,09        | <b>0,43</b> | <b>0,01</b> |
| STM3970 | ubiE | 1,76        | 0,02        | 1,39        | 0,07        |
| STM3978 | yigC | 0,56        | 0,03        | 1,05        | 0,10        |
| STM3979 | ubiB | 0,71        | 0,07        | 0,90        | 0,09        |
| STM3993 | mobB | 1,06        | 0,02        | 0,72        | 0,03        |
| STM3994 | mobA | 0,53        | 0,02        | 1,25        | 0,02        |
| STM4004 | hemN |             |             | 0,20        |             |
| STM4012 |      | <b>0,11</b> | <b>0,01</b> | 2,03        | 0,06        |
| STM4089 | menG | <b>3,18</b> | <b>0,03</b> | <b>0,14</b> | <b>0,01</b> |
| STM4090 | menA | 0,79        | 0,08        | 1,69        | 0,03        |
| STM4130 | btuB | 1,10        | 0,09        | 1,49        | 0,02        |
| STM4138 | birA | 0,89        | 0,03        | 0,77        | 0,03        |
| STM4139 | coaA | <b>2,53</b> | <b>0,00</b> | 0,97        | 0,10        |

|         |      |      |      |      |      |
|---------|------|------|------|------|------|
| STM4159 | thiH | 1,08 | 0,03 | 0,68 | 0,00 |
| STM4161 |      | 1,27 | 0,03 | 1,21 | 0,06 |
| STM4162 | thiF | 1,51 | 0,02 | 0,82 | 0,06 |
| STM4163 | thiE | 1,84 | 0,01 | 0,67 | 0,03 |
| STM4164 | thiC | 1,50 | 0,02 | 0,67 | 0,02 |
| STM4167 | hemE | 0,99 | 0,09 | 1,16 | 0,06 |
| STM4233 | ubiC | 0,79 | 0,02 | 0,78 | 0,02 |
| STM4234 | ubiA | 0,42 | 0,01 | 2,12 | 0,00 |
| STM4576 | lplA | 0,93 | 0,09 | 1,19 | 0,07 |

### Drug/analog resistance

|         |      |      |      |      |      |
|---------|------|------|------|------|------|
| STM0090 | ksgA | 3,95 | 0,02 | 0,24 | 0,01 |
| STM0147 | ampE | 0,80 | 0,06 | 0,64 | 0,03 |
| STM0376 | sbmA | 0,79 | 0,06 | 0,88 | 0,09 |
| STM0444 | ampG | 0,63 | 0,00 | 7,62 | 0,02 |
| STM0476 | acrA | 3,53 | 0,03 | 0,12 | 0,01 |
| STM0477 | acrR | 0,74 | 0,07 | 1,30 | 0,09 |
| STM0503 | ybbM | 1,40 | 0,06 | 1,19 | 0,07 |
| STM0578 | nfnB | 3,31 | 0,03 | 0,15 | 0,00 |
| STM1518 | marB | 0,25 | 0,00 | 0,46 | 0,04 |
| STM1519 | marA | 0,97 | 0,10 | 5,76 | 0,03 |
| STM1520 | marR | 5,15 | 0,03 | 0,78 | 0,08 |
| STM1522 | ydeA |      |      |      |      |
| STM1608 | tehB | 0,79 | 0,03 | 0,55 | 0,00 |
| STM1609 | tehA | 1,22 | 0,06 | 1,01 | 0,09 |
| STM2184 | sanA | 1,17 | 0,03 | 0,72 | 0,03 |
| STM2221 | bcr  | 0,47 | 0,06 | 0,76 | 0,08 |
| STM2304 | pmrD | 1,28 | 0,00 | 0,82 | 0,05 |
| STM2814 | emrA | 0,49 | 0,04 | 1,12 | 0,09 |
| STM2815 | emrB | 0,83 | 0,07 | 0,74 | 0,07 |
| STM3009 | ygeD | 1,06 | 0,05 | 0,33 | 0,03 |
| STM3015 | ygeA | 1,02 | 0,09 | 0,44 | 0,01 |
| STM3101 | yggT | 0,98 | 0,09 | 0,79 | 0,03 |
| STM3205 | bacA | 1,33 | 0,05 | 1,11 | 0,08 |
| STM3391 | acrF | 1,10 | 0,09 | 0,68 | 0,02 |
| STM3798 | emrD | 1,10 | 0,08 | 0,55 | 0,00 |

### Energy production and conversion

|         |       |      |      |      |      |
|---------|-------|------|------|------|------|
| STM0056 |       | 0,51 |      | 1,21 | 0,08 |
| STM0057 |       | 1,11 | 0,08 | 1,37 | 0,07 |
| STM0058 | citC2 | 1,00 | 0,10 | 0,55 | 0,01 |
| STM0059 | citD2 | 0,94 | 0,05 | 0,73 | 0,03 |
| STM0061 | citF2 | 1,28 | 0,03 | 1,94 | 0,07 |
| STM0072 | caiB  | 0,51 | 0,03 | 0,35 | 0,03 |
| STM0075 | fixA  | 3,64 | 0,02 | 0,17 | 0,01 |
| STM0076 | fixB  | 1,00 | 0,10 | 2,63 | 0,03 |

|         |      |      |      |      |      |
|---------|------|------|------|------|------|
| STM0077 | fixC | 0,32 | 0,00 | 2,58 | 0,05 |
| STM0078 | fixX | 0,62 | 0,03 | 0,11 | 0,00 |
| STM0152 | aceE | 1,61 | 0,01 | 1,45 | 0,07 |
| STM0153 | aceF | 1,29 | 0,03 | 1,21 | 0,08 |
| STM0154 | lpdA | 0,83 | 0,02 | 0,86 | 0,05 |
| STM0158 | acnB | 1,16 | 0,04 | 0,49 | 0,00 |
| STM0360 |      | 0,96 | 0,06 | 0,77 | 0,04 |
| STM0361 |      | 0,89 | 0,03 | 0,77 | 0,03 |
| STM0369 | prpC | 0,87 | 0,06 | 0,74 | 0,03 |
| STM0421 | yajO | 0,98 | 0,06 | 0,81 | 0,05 |
| STM0440 | cyoD | 1,06 | 0,08 | 0,48 | 0,01 |
| STM0441 | cyoC | 1,00 | 0,10 | 0,97 | 0,10 |
| STM0442 | cyoB |      |      | 4,18 | 0,01 |
| STM0443 | cyoA | 0,91 | 0,07 | 0,41 | 0,00 |
| STM0528 | allD | 3,10 | 0,00 | 2,24 | 0,04 |
| STM0529 | fdrA | 1,52 | 0,04 | 3,26 | 0,00 |
| STM0564 |      | 1,44 | 0,07 | 0,76 | 0,05 |
| STM0578 | nfnB | 3,31 | 0,03 | 0,15 | 0,00 |
| STM0611 |      | 0,65 | 0,04 | 2,61 | 0,01 |
| STM0612 |      | 0,58 | 0,01 | 1,62 | 0,03 |
| STM0621 | citF | 1,14 | 0,06 | 0,90 | 0,05 |
| STM0623 | citD | 1,24 | 0,00 | 0,64 | 0,01 |
| STM0627 | dcuC | 1,06 | 0,00 | 1,12 | 0,06 |
| STM0691 |      | 3,32 | 0,02 | 0,16 | 0,01 |
| STM0694 | fldA | 1,64 | 0,01 | 1,08 | 0,09 |
| STM0730 | gltA | 1,48 | 0,00 | 0,78 | 0,02 |
| STM0732 | sdhC | 1,33 | 0,01 | 0,51 | 0,00 |
| STM0733 | sdhD | 0,64 | 0,03 | 0,75 | 0,03 |
| STM0734 | sdhA | 1,38 | 0,03 | 1,25 | 0,07 |
| STM0735 | sdhB | 0,99 | 0,08 | 0,72 | 0,02 |
| STM0737 | sucB | 1,25 | 0,01 | 0,91 | 0,08 |
| STM0738 | sucC | 1,38 | 0,00 | 1,33 | 0,07 |
| STM0739 | sucD | 1,27 | 0,00 | 0,57 | 0,00 |
| STM0740 | cydA | 0,85 | 0,07 | 0,83 | 0,08 |
| STM0741 | cydB | 1,04 | 0,10 | 0,67 | 0,06 |
| STM0761 |      | 0,15 | 0,00 | 6,46 | 0,01 |
| STM0762 |      | 0,78 | 0,01 | 1,75 | 0,03 |
| STM0775 | galT | 1,22 | 0,02 | 1,60 | 0,07 |
| STM0843 | pflF | 1,07 | 0,09 | 1,23 | 0,08 |
| STM0855 |      | 0,41 | 0,00 | 1,64 | 0,06 |
| STM0856 |      | 1,11 | 0,08 | 1,22 | 0,08 |
| STM0858 |      | 0,64 | 0,05 | 1,83 | 0,07 |
| STM0874 | mdaA | 0,31 | 0,04 | 1,36 | 0,08 |
| STM0936 | hcr  | 1,96 | 0,05 | 0,82 | 0,05 |
| STM0937 | hcp  | 1,10 | 0,05 | 0,74 | 0,04 |
| STM0956 | cydC | 2,71 | 0,04 | 0,16 | 0,00 |

|         |      |       |      |       |      |
|---------|------|-------|------|-------|------|
| STM0957 | cydD | 1,00  | 0,10 | 1,32  | 0,07 |
| STM0964 | dmsA | 0,83  | 0,03 | 0,63  | 0,01 |
| STM0965 | dmsB | 1,71  | 0,05 | 0,23  | 0,00 |
| STM0973 | pflB | 1,00  | 0,10 | 0,10  | 0,02 |
| STM1083 | yccX | 0,44  | 0,06 | 0,69  | 0,02 |
| STM1124 | putA | 0,86  | 0,09 | 1,18  | 0,08 |
| STM1211 | ndh  | 0,95  | 0,07 | 0,55  | 0,00 |
| STM1238 | icdA | 1,50  | 0,02 | 1,26  | 0,07 |
| STM1253 |      | 0,90  | 0,00 | 0,71  | 0,00 |
| STM1261 |      | 0,31  | 0,00 | 3,10  | 0,02 |
| STM1296 | ydjA | 0,99  | 0,10 | 0,34  | 0,02 |
| STM1305 | astD | 1,43  | 0,03 | 0,60  | 0,04 |
| STM1351 | ydiT | 0,21  | 0,00 | 12,72 | 0,00 |
| STM1352 | ydiS | 1,09  | 0,07 | 2,08  | 0,00 |
| STM1353 | ydiR | 5,37  | 0,03 | 1,11  | 0,08 |
| STM1354 | ydiQ | 1,35  | 0,06 | 0,69  | 0,07 |
| STM1383 | ttrA | 1,51  | 0,02 | 1,04  | 0,07 |
| STM1436 | nemA | 3,18  | 0,03 | 0,11  | 0,01 |
| STM1454 | ydgQ | 2,06  | 0,06 | 1,95  | 0,06 |
| STM1455 | ydgP | 0,41  | 0,04 | 1,00  | 0,10 |
| STM1456 | ydgO | 1,49  | 0,07 | 0,39  | 0,04 |
| STM1458 | ydgM | 1,14  | 0,08 | 2,45  | 0,02 |
| STM1459 |      | 0,97  | 0,09 | 5,18  | 0,00 |
| STM1468 | fumA | 0,83  | 0,00 | 0,91  | 0,04 |
| STM1469 | fumC | 0,93  | 0,06 | 0,59  | 0,00 |
| STM1479 | pntA | 1,23  | 0,02 | 0,72  | 0,01 |
| STM1480 | pntB | 1,33  | 0,02 | 0,66  | 0,01 |
| STM1498 |      | 0,12  | 0,00 | 7,09  | 0,01 |
| STM1499 |      | 0,48  | 0,02 | 0,77  | 0,01 |
| STM1524 | yneI | 0,53  | 0,07 | 0,85  | 0,05 |
| STM1533 |      | 1,11  | 0,06 | 1,13  | 0,09 |
| STM1536 |      | 0,89  | 0,09 | 2,61  | 0,00 |
| STM1537 |      | 0,97  | 0,10 | 1,54  | 0,06 |
| STM1538 |      | 1,04  | 0,10 | 0,82  | 0,09 |
| STM1539 |      | 0,65  | 0,01 | 0,49  | 0,00 |
| STM1556 |      | 1,28  | 0,08 | 0,09  | 0,00 |
| STM1566 | sfcA | 0,93  | 0,04 | 0,62  | 0,01 |
| STM1568 | fdnI | 0,55  | 0,02 | 0,92  | 0,06 |
| STM1569 | fdnH | 0,91  | 0,09 | 2,27  | 0,05 |
| STM1570 | fdnG | 0,91  | 0,08 | 0,98  | 0,09 |
| STM1577 | narZ |       |      |       |      |
| STM1579 | narW | 1,08  | 0,09 | 1,22  | 0,08 |
| STM1580 | narV | 3,57  | 0,02 | 0,24  | 0,02 |
| STM1597 | ydcW | 0,87  | 0,02 | 0,27  | 0,03 |
| STM1620 |      | 1,15  | 0,04 | 2,07  | 0,05 |
| STM1627 |      | 23,49 | 0,00 | 1,31  | 0,08 |

|         |      |      |      |      |      |
|---------|------|------|------|------|------|
| STM1639 | cybB | 1,35 | 0,01 | 1,83 | 0,03 |
| STM1647 | ldhA | 1,41 | 0,02 | 1,51 | 0,07 |
| STM1651 | nifJ |      |      | 4,73 | 0,00 |
| STM1712 | acnA | 1,38 | 0,02 | 0,97 | 0,10 |
| STM1749 | adhE | 1,27 | 0,05 | 1,44 | 0,07 |
| STM1761 | narI | 2,61 | 0,00 | 3,34 | 0,01 |
| STM1762 | narJ | 0,82 | 0,03 | 0,80 | 0,02 |
| STM1763 | narH | 0,75 | 0,04 | 0,71 | 0,04 |
| STM1786 |      | 1,11 | 0,05 | 2,17 | 0,05 |
| STM1787 |      | 1,35 | 0,01 | 1,07 | 0,09 |
| STM1788 |      | 1,09 | 0,05 | 1,37 | 0,08 |
| STM1789 |      | 1,02 | 0,09 | 1,01 | 0,10 |
| STM1792 |      | 0,82 | 0,02 | 1,61 | 0,03 |
| STM1793 |      | 1,20 | 0,09 | 0,61 | 0,05 |
| STM2051 | pduP | 1,01 | 0,10 | 0,76 | 0,07 |
| STM2052 | pduQ | 1,30 | 0,03 | 0,99 | 0,09 |
| STM2053 | pduS | 0,75 | 0,00 | 0,55 | 0,00 |
| STM2057 | pduW | 2,08 | 0,01 | 0,30 | 0,02 |
| STM2063 | phsC | 0,76 | 0,07 | 3,65 | 0,00 |
| STM2064 | phsB | 8,34 | 0,05 | 0,74 | 0,03 |
| STM2065 | phsA | 1,19 | 0,04 | 0,88 | 0,08 |
| STM2167 | dld  | 1,03 | 0,09 | 1,06 | 0,10 |
| STM2255 | napC | 0,57 | 0,00 | 0,98 | 0,10 |
| STM2256 | napB | 1,12 | 0,08 | 1,41 | 0,07 |
| STM2261 | napF | 3,33 | 0,02 | 0,17 | 0,01 |
| STM2279 | yfaE | 2,71 | 0,05 | 1,61 | 0,07 |
| STM2282 | glpQ | 0,65 | 0,01 | 0,87 | 0,05 |
| STM2284 | glpA | 1,23 | 0,08 | 0,77 | 0,08 |
| STM2286 | glpC | 0,86 | 0,05 | 0,54 | 0,01 |
| STM2316 | nuoN | 0,85 | 0,07 | 0,91 | 0,01 |
| STM2317 | nuoM | 0,90 | 0,01 | 1,29 | 0,07 |
| STM2318 | nuoL | 0,95 | 0,04 | 0,51 | 0,05 |
| STM2319 | nuoK | 4,79 | 0,00 | 1,72 | 0,01 |
| STM2320 | nuoJ | 1,00 | 0,09 | 0,52 | 0,01 |
| STM2321 | nuoI | 0,99 | 0,08 | 0,59 | 0,00 |
| STM2322 | nuoH | 0,99 | 0,10 | 0,74 | 0,00 |
| STM2323 | nuoG | 0,76 | 0,07 | 0,94 | 0,10 |
| STM2324 | nuoF | 0,99 | 0,10 | 0,78 | 0,08 |
| STM2325 | nuoE | 0,83 | 0,08 | 0,99 | 0,10 |
| STM2326 | nuoC | 0,85 | 0,03 | 0,65 | 0,01 |
| STM2327 | nuoB | 0,97 | 0,09 | 0,57 | 0,00 |
| STM2328 | nuoA | 1,83 | 0,02 | 1,44 | 0,06 |
| STM2337 | ackA | 1,40 | 0,01 | 0,73 | 0,03 |
| STM2338 | pta  | 1,57 | 0,01 | 2,00 | 0,05 |
| STM2406 |      | 0,71 | 0,04 | 0,45 | 0,05 |
| STM2463 | eutE |      |      | 0,23 | 0,04 |

|         |      |      |      |       |      |
|---------|------|------|------|-------|------|
| STM2466 | eutD | 1,80 | 0,00 | 2,23  | 0,04 |
| STM2472 | maeB | 0,88 | 0,05 | 0,57  | 0,02 |
| STM2527 |      | 1,01 | 0,09 | 0,81  | 0,03 |
| STM2529 |      | 1,26 | 0,02 | 0,36  | 0,04 |
| STM2530 |      | 0,44 | 0,01 | 1,13  | 0,05 |
| STM2538 | fdx  | 0,90 | 0,05 | 0,55  | 0,01 |
| STM2542 | nifU | 1,91 | 0,02 | 1,26  | 0,08 |
| STM2548 | asrA | 1,00 | 0,10 | 0,39  | 0,02 |
| STM2550 | asrC | 0,06 | 0,00 | 0,78  | 0,07 |
| STM2556 | hmpA | 1,22 | 0,03 | 1,89  | 0,06 |
| STM2576 | yfhL | 1,11 | 0,04 | 1,06  | 0,09 |
| STM2651 | yfiQ | 0,69 | 0,02 | 0,39  | 0,05 |
| STM2791 | gabD | 1,07 | 0,07 | 0,95  | 0,09 |
| STM2840 |      | 0,20 | 0,03 | 1,36  | 0,06 |
| STM2843 | hydN | 1,07 | 0,08 | 1,81  | 0,02 |
| STM2845 | hycl | 1,07 | 0,09 | 0,54  | 0,04 |
| STM2847 | hycG | 0,91 | 0,04 | 15,09 | 0,00 |
| STM2848 | hycF | 0,70 | 0,03 | 0,51  | 0,01 |
| STM2849 | hycE | 0,69 | 0,01 | 0,96  | 0,09 |
| STM2850 | hycD | 0,64 | 0,05 | 1,86  | 0,06 |
| STM2851 | hycC | 1,15 | 0,03 | 0,72  | 0,04 |
| STM2852 | hycB | 0,95 | 0,07 | 2,66  | 0,05 |
| STM2963 |      | 1,01 | 0,09 | 0,76  | 0,01 |
| STM2973 | fucO | 1,85 | 0,04 | 0,68  | 0,03 |
| STM3008 | tas  | 1,04 | 0,08 | 0,63  | 0,00 |
| STM3045 | fldB | 0,89 | 0,05 | 0,71  | 0,03 |
| STM3081 |      | 0,10 | 0,00 | 0,61  | 0,07 |
| STM3118 |      | 1,57 | 0,07 | 2,41  | 0,02 |
| STM3129 |      | 1,07 | 0,09 | 2,28  | 0,00 |
| STM3146 | hybD | 0,74 | 0,02 | 0,60  | 0,02 |
| STM3147 | hybC | 0,80 | 0,04 | 0,80  | 0,04 |
| STM3149 | hybA | 0,87 | 0,05 | 0,91  | 0,09 |
| STM3150 | hypO | 0,81 | 0,05 | 0,78  | 0,08 |
| STM3164 | yqhD | 1,48 | 0,03 | 1,28  | 0,07 |
| STM3168 | ygiR | 0,72 | 0,07 | 1,78  | 0,03 |
| STM3241 | tdcE | 0,25 | 0,00 | 3,58  | 0,01 |
| STM3242 | tdcD | 0,62 | 0,05 | 4,17  | 0,03 |
| STM3276 | yhbW | 0,92 | 0,08 | 0,74  | 0,02 |
| STM3353 | oadG | 3,28 | 0,03 | 0,14  | 0,01 |
| STM3354 |      | 1,03 | 0,08 | 0,52  | 0,02 |
| STM3355 |      | 1,41 | 0,00 | 0,20  | 0,01 |
| STM3376 | yhdH | 0,76 | 0,03 | 0,80  | 0,06 |
| STM3464 | prkB | 0,58 | 0,02 | 0,68  | 0,06 |
| STM3474 | nirB | 0,61 | 0,06 | 2,73  | 0,03 |
| STM3500 | pckA | 1,06 | 0,06 | 0,74  | 0,04 |
| STM3526 | glpD | 0,72 | 0,07 | 0,96  | 0,10 |

|         |      |      |      |      |      |
|---------|------|------|------|------|------|
| STM3529 |      | 0,55 | 0,05 | 0,57 | 0,01 |
| STM3553 | ugpQ | 1,68 | 0,00 | 0,80 | 0,00 |
| STM3597 | gor  | 1,23 | 0,03 | 1,28 | 0,08 |
| STM3614 | dctA | 1,20 | 0,06 | 1,53 | 0,02 |
| STM3644 | bisC | 1,35 | 0,03 | 0,97 | 0,08 |
| STM3646 | yiaE | 0,53 | 0,01 | 0,72 | 0,06 |
| STM3666 | ysaA | 0,93 | 0,07 | 0,61 | 0,01 |
| STM3668 | yiaK | 1,07 | 0,09 | 4,68 | 0,00 |
| STM3680 | aldB | 0,92 | 0,06 | 0,87 | 0,08 |
| STM3692 | lldP | 1,03 | 0,09 | 1,24 | 0,05 |
| STM3694 | lldD | 1,51 | 0,01 | 0,88 | 0,05 |
| STM3700 | gpsA | 1,26 | 0,04 | 1,10 | 0,08 |
| STM3822 | torA | 0,86 | 0,04 | 3,45 | 0,02 |
| STM3823 | torC | 4,56 | 0,05 | 0,70 | 0,02 |
| STM3864 | atpC | 0,92 | 0,08 | 0,59 | 0,01 |
| STM3865 | atpD | 1,19 | 0,01 | 0,82 | 0,01 |
| STM3866 | atpG | 1,41 | 0,00 | 0,74 | 0,02 |
| STM3867 | atpA | 1,08 | 0,07 | 1,61 | 0,06 |
| STM3868 | atpH | 1,15 | 0,05 | 0,46 | 0,00 |
| STM3869 | atpF | 0,94 | 0,08 | 0,71 | 0,02 |
| STM3870 | atpE | 0,60 | 0,01 | 0,75 | 0,02 |
| STM3871 | atpB | 1,05 | 0,08 | 1,32 | 0,07 |
| STM3872 | atpI | 1,24 | 0,01 | 0,73 | 0,05 |
| STM3875 | mioC | 1,01 | 0,10 | 1,43 | 0,08 |
| STM3987 | hemG | 0,56 | 0,05 | 1,25 | 0,09 |
| STM4035 | fdol | 1,32 | 0,02 | 0,98 | 0,10 |
| STM4036 | fdoH | 0,82 | 0,08 | 0,90 | 0,09 |
| STM4037 | fdoG | 1,85 | 0,04 | 0,29 | 0,02 |
| STM4038 | fdhD | 0,87 | 0,03 | 0,58 | 0,00 |
| STM4044 |      | 1,97 | 0,06 | 0,67 | 0,00 |
| STM4084 | fpr  | 0,84 | 0,08 | 0,93 | 0,09 |
| STM4114 | pflD | 0,88 | 0,03 | 1,99 | 0,05 |
| STM4119 | ppc  | 1,07 | 0,05 | 0,79 | 0,03 |
| STM4126 | udhA | 0,93 | 0,07 | 1,34 | 0,08 |
| STM4183 | aceB | 3,18 | 0,03 | 0,18 | 0,01 |
| STM4184 | aceA | 0,68 | 0,00 | 0,73 | 0,02 |
| STM4245 | qor  | 0,90 | 0,05 | 0,72 | 0,01 |
| STM4279 | nrfC | 0,87 | 0,06 | 0,64 | 0,02 |
| STM4283 | gltP | 1,41 | 0,01 | 0,82 | 0,04 |
| STM4285 | fdhF | 1,74 | 0,07 | 0,52 | 0,03 |
| STM4300 | fumB | 0,96 | 0,08 | 0,81 | 0,03 |
| STM4305 |      | 0,15 | 0,02 | 1,65 | 0,06 |
| STM4306 |      | 0,10 | 0,00 | 1,94 | 0,05 |
| STM4340 | frdD | 0,41 | 0,03 | 0,47 | 0,01 |
| STM4341 | frdC | 2,15 | 0,04 | 0,16 | 0,00 |
| STM4342 | frdB | 2,03 | 0,05 | 0,14 | 0,01 |



|         |      |      |      |      |      |
|---------|------|------|------|------|------|
| STM4343 | frdA | 0,74 | 0,07 | 0,96 | 0,10 |
| STM4355 | yjeS | 0,75 | 0,04 | 0,72 | 0,06 |
| STM4414 | ppa  | 1,10 | 0,09 | 0,76 | 0,08 |
| STM4421 |      | 0,84 | 0,06 | 0,66 | 0,02 |
| STM4439 | cybC | 1,25 | 0,02 | 1,51 | 0,07 |
| STM4519 |      | 2,01 | 0,02 | 0,79 | 0,08 |

### Global regulatory function

|         |      |      |      |       |      |
|---------|------|------|------|-------|------|
| STM0049 | lytB | 1,16 | 0,02 | 0,87  | 0,07 |
| STM0397 | phoB | 2,91 | 0,03 | 0,14  | 0,01 |
| STM0398 | phoR | 0,65 | 0,05 | 0,41  | 0,01 |
| STM0450 | lon  | 0,80 | 0,08 | 1,06  | 0,10 |
| STM0600 | cstA | 0,93 | 0,06 | 0,88  | 0,01 |
| STM0693 | fur  | 1,12 | 0,06 | 0,72  | 0,07 |
| STM0702 | kdpE | 4,09 | 0,02 | 0,23  | 0,02 |
| STM0703 | kdpD | 0,68 | 0,06 | 1,25  | 0,09 |
| STM0831 | dps  | 1,41 | 0,01 | 0,76  | 0,04 |
| STM1230 | phoQ | 3,45 | 0,04 | 4,95  | 0,02 |
| STM1231 | phoP | 3,89 | 0,00 | 1,37  | 0,06 |
| STM1311 | osmE | 1,05 | 0,06 | 0,46  | 0,00 |
| STM1471 | rstB | 1,09 | 0,09 | 1,50  | 0,05 |
| STM1505 | rspA | 1,06 | 0,09 | 1,35  | 0,07 |
| STM1506 | rspB | 3,66 | 0,02 | 0,16  | 0,01 |
| STM1660 | fnr  | 0,99 | 0,10 | 0,39  | 0,03 |
| STM2546 | suhB | 1,18 | 0,08 | 0,69  | 0,08 |
| STM2580 | era  | 1,30 | 0,01 | 0,61  | 0,00 |
| STM2637 | rseC | 0,40 | 0,00 | 19,60 | 0,00 |
| STM2638 | rseB | 1,70 | 0,00 | 0,73  | 0,04 |
| STM2639 | rseA | 1,42 | 0,00 | 1,71  | 0,07 |
| STM2640 | rpoE | 3,84 | 0,02 | 0,13  | 0,01 |
| STM2826 | csrA | 0,88 | 0,01 | 0,73  | 0,07 |
| STM2924 | rpoS | 2,38 | 0,02 | 0,28  | 0,03 |
| STM2956 | relA | 1,62 | 0,02 | 1,26  | 0,08 |
| STM2958 | barA | 0,79 | 0,02 | 0,99  | 0,09 |
| STM3211 | rpoD | 0,73 | 0,01 | 0,63  | 0,02 |
| STM3320 | rpoN | 1,18 | 0,05 | 1,37  | 0,07 |
| STM3321 | yhbH | 1,00 | 0,10 | 0,78  | 0,08 |
| STM3328 | arcB | 3,29 | 0,04 | 0,30  | 0,01 |
| STM3341 | sspB | 0,86 | 0,04 | 0,53  | 0,00 |
| STM3342 | sspA | 1,21 | 0,05 | 1,34  | 0,08 |
| STM3466 | crp  | 1,16 | 0,08 | 1,02  | 0,09 |
| STM3501 | envZ | 1,98 |      | 7,95  |      |
| STM3502 | ompR | 0,65 | 0,04 | 0,99  | 0,10 |
| STM3568 | rpoH | 1,00 | 0,10 | 0,49  | 0,01 |
| STM3742 | spoT | 0,58 | 0,04 | 1,30  | 0,02 |
| STM3853 | phoU | 0,93 | 0,08 | 0,40  | 0,02 |

|         |      |      |      |      |      |
|---------|------|------|------|------|------|
| STM3939 | cyaA | 0,93 | 0,07 | 0,68 | 0,02 |
| STM4058 | cpxA | 0,67 | 0,05 | 1,19 | 0,07 |
| STM4094 | cytR | 1,22 | 0,01 | 0,71 | 0,03 |
| STM4125 | oxyR | 0,54 | 0,01 | 0,91 | 0,07 |
| STM4237 | lexA | 0,76 | 0,01 | 0,97 | 0,09 |
| STM4265 | soxS | 0,49 | 0,01 | 0,44 | 0,00 |
| STM4266 | soxR | 0,92 | 0,08 | 1,02 | 0,09 |
| STM4588 | creB | 3,26 | 0,04 | 1,13 | 0,07 |
| STM4589 | creC | 1,22 | 0,08 | 1,29 | 0,07 |
| STM4598 | arcA | 0,76 | 0,03 | 1,43 | 0,06 |

### Inorganic ion transport and metabolism

|         |      |      |      |       |      |
|---------|------|------|------|-------|------|
| STM0035 |      | 3,49 | 0,00 | 5,31  | 0,01 |
| STM0039 | nhaA | 1,74 | 0,07 | 0,87  | 0,08 |
| STM0084 |      | 0,55 | 0,03 | 2,46  | 0,04 |
| STM0086 | kefC | 0,76 | 0,01 | 0,88  | 0,09 |
| STM0089 | apaG | 0,74 | 0,02 | 0,86  | 0,03 |
| STM0107 | yabK |      |      |       |      |
| STM0171 | yadF | 1,28 | 0,03 | 0,78  | 0,03 |
| STM0191 | fhuA | 2,13 | 0,04 | 0,86  | 0,08 |
| STM0192 | fhuC | 1,07 | 0,07 | 1,59  | 0,04 |
| STM0193 | fhuD | 1,22 | 0,05 | 1,22  | 0,06 |
| STM0194 | fhuB | 1,11 | 0,05 | 0,71  | 0,03 |
| STM0206 | btuF | 0,70 | 0,04 | 1,30  | 0,02 |
| STM0245 | yaeC | 1,16 | 0,04 | 0,70  | 0,01 |
| STM0246 | yaeE |      |      |       |      |
| STM0247 | abc  | 0,25 | 0,00 | 0,96  | 0,09 |
| STM0355 |      | 0,16 | 0,03 | 10,53 | 0,01 |
| STM0364 | foxA | 3,50 | 0,03 | 8,49  | 0,01 |
| STM0425 | thil | 1,34 | 0,03 | 0,63  | 0,00 |
| STM0429 | phnS | 1,23 | 0,07 | 0,84  | 0,08 |
| STM0463 | amtB | 0,98 | 0,10 | 0,65  | 0,06 |
| STM0492 | ybaL | 0,59 | 0,05 | 0,39  | 0,04 |
| STM0510 | sfbA | 0,73 | 0,02 | 0,51  | 0,03 |
| STM0511 | sfbB | 0,16 | 0,02 | 1,77  | 0,03 |
| STM0512 | sfbC | 0,56 | 0,04 | 1,03  | 0,10 |
| STM0562 |      | 0,53 | 0,01 | 1,30  | 0,09 |
| STM0585 | fepA | 0,81 | 0,04 | 0,48  | 0,01 |
| STM0586 | fes  | 0,20 | 0,01 | 2,30  | 0,04 |
| STM0590 | fepC | 0,59 | 0,06 | 3,20  | 0,01 |
| STM0591 | fepG | 0,92 | 0,05 | 0,79  | 0,04 |
| STM0592 | fepD | 0,73 | 0,03 | 0,79  | 0,01 |
| STM0594 | fepB | 0,84 | 0,06 | 0,69  | 0,03 |
| STM0618 | citT | 0,56 | 0,06 | 1,60  | 0,06 |
| STM0667 | ybeX | 1,15 | 0,05 | 0,58  | 0,01 |
| STM0693 | fur  | 1,12 | 0,06 | 0,72  | 0,07 |

|         |      |             |             |             |             |
|---------|------|-------------|-------------|-------------|-------------|
| STM0704 | kdpC | 0,86        | 0,08        | 1,08        | 0,09        |
| STM0705 | kdpB | 1,04        | 0,09        | 1,07        | 0,09        |
| STM0706 | kdpA | 0,88        | 0,05        | 0,65        | 0,02        |
| STM0758 | ybgR | <b>0,50</b> | <b>0,02</b> | 0,62        | 0,06        |
| STM0765 |      | 1,10        | 0,05        | <b>2,01</b> | <b>0,05</b> |
| STM0770 |      | <b>0,28</b> | <b>0,04</b> | 0,70        | 0,07        |
| STM0771 |      | 0,89        | 0,04        | <b>7,46</b> | <b>0,02</b> |
| STM0778 | modF | 1,02        | 0,09        | 0,80        | 0,05        |
| STM0781 | modA | 1,45        | 0,02        | 1,10        | 0,09        |
| STM0782 | modB | 0,64        | 0,06        | <b>5,12</b> | <b>0,01</b> |
| STM0783 | modC | 1,73        | 0,06        | 1,90        | 0,05        |
| STM0831 | dps  | 1,41        | 0,01        | 0,76        | 0,04        |
| STM0836 | ybiR | 1,55        | 0,00        | 0,92        | 0,09        |
| STM0924 |      |             |             |             |             |
| STM0974 | focA | 1,52        | 0,00        | 0,75        | 0,05        |
| STM1044 | sodC | 1,08        | 0,08        | 0,64        | 0,01        |
| STM1084 | yccK | 0,92        | 0,06        | 0,60        | 0,02        |
| STM1150 | mdoG | 1,29        | 0,07        | 0,75        | 0,08        |
| STM1204 | fhuE | <b>3,36</b> | <b>0,02</b> | <b>0,16</b> | <b>0,01</b> |
| STM1271 | yeaR | <b>0,15</b> | <b>0,02</b> | 1,30        | 0,08        |
| STM1278 | yeaN |             |             |             |             |
| STM1318 | katE | 0,68        | 0,01        | 0,88        | 0,05        |
| STM1346 | ydiE | 0,27        | 0,06        | <b>0,18</b> | <b>0,00</b> |
| STM1431 | sodB | 0,88        | 0,02        | <b>0,50</b> | <b>0,00</b> |
| STM1440 | sodC | 1,04        | 0,07        | 0,66        | 0,00        |
| STM1482 | ydgF | 1,15        | 0,09        | 1,99        | 0,01        |
| STM1483 | ydgE | 1,17        | 0,03        | 0,79        | 0,04        |
| STM1490 |      | <b>0,44</b> | <b>0,03</b> | 1,66        | 0,01        |
| STM1587 | yncD | <b>2,14</b> | <b>0,00</b> | 1,50        | 0,03        |
| STM1609 | tehA | 1,22        | 0,06        | 1,01        | 0,09        |
| STM1622 | ydcG | 0,89        | 0,04        | 0,65        | 0,00        |
| STM1653 |      | 1,09        | 0,06        | 1,18        | 0,09        |
| STM1656 |      | 1,71        | 0,02        | 1,42        | 0,07        |
| STM1686 | pspE |             |             |             |             |
| STM1731 |      | 0,99        | 0,10        | <b>4,68</b> | <b>0,00</b> |
| STM1741 |      | 0,88        | 0,03        | 1,15        | 0,05        |
| STM1765 | narK | 0,77        | 0,01        | 1,47        | 0,07        |
| STM1769 | ychN | 0,86        | 0,01        | 0,65        | 0,01        |
| STM1771 | chaA | 0,81        | 0,02        | 0,83        | 0,01        |
| STM1781 | ychM | <b>0,11</b> | <b>0,02</b> | 0,87        | 0,09        |
| STM1801 | ycgO | 0,96        | 0,09        | 1,00        | 0,10        |
| STM1806 | nhaB | 0,93        | 0,08        | 1,36        | 0,00        |
| STM1808 |      | <b>0,26</b> | <b>0,03</b> | 0,89        | 0,07        |
| STM1874 |      | 1,27        | 0,03        | 0,93        | 0,09        |
| STM1891 | znuA | 0,64        | 0,01        | 0,68        | 0,07        |
| STM1892 | znuC | <b>2,06</b> | <b>0,04</b> | 1,21        | 0,08        |

|         |      |             |             |             |             |
|---------|------|-------------|-------------|-------------|-------------|
| STM1893 | zunB | 1,01        | 0,10        | 1,49        | 0,05        |
| STM1907 | cutC | 1,49        | 0,04        | <b>0,47</b> | <b>0,03</b> |
| STM1932 | ftnB | 0,83        | 0,08        | 1,00        | 0,10        |
| STM1935 | ftn  | 0,93        | 0,05        | 0,63        | 0,02        |
| STM2020 | cbiO | 1,06        | 0,03        | 0,77        | 0,02        |
| STM2021 | cboQ | 0,96        | 0,06        | 1,53        | 0,01        |
| STM2022 | cbiN | <b>0,40</b> | <b>0,01</b> | 0,62        | 0,00        |
| STM2023 | cbiM | 0,87        | 0,02        | 0,67        | 0,02        |
| STM2199 | cirA | 0,62        | 0,05        | 1,61        | 0,07        |
| STM2260 | napD | 1,12        | 0,08        | 1,20        | 0,08        |
| STM2333 | yfbS | 0,88        | 0,07        | 0,61        | 0,03        |
| STM2398 | pgtC | <b>2,70</b> | <b>0,04</b> | <b>3,00</b> | <b>0,04</b> |
| STM2404 |      | <b>8,22</b> | <b>0,01</b> | 1,52        | 0,07        |
| STM2408 | mntH | 0,65        | 0,05        | <b>5,94</b> | <b>0,01</b> |
| STM2441 | cysA | 1,31        | 0,01        | 0,96        | 0,09        |
| STM2442 | cysW | 1,90        | 0,01        | 1,20        | 0,08        |
| STM2444 | cysP | 1,14        | 0,02        | 0,74        | 0,00        |
| STM2446 |      | 1,01        | 0,09        | 1,08        | 0,06        |
| STM2482 | yffB | 1,09        | 0,09        | <b>0,49</b> | <b>0,02</b> |
| STM2495 | yfgD | 0,73        | 0,04        | <b>0,43</b> | <b>0,00</b> |
| STM2501 | ppk  | 0,88        | 0,05        | 0,93        | 0,08        |
| STM2533 | sseA | <b>2,29</b> | <b>0,03</b> | <b>0,16</b> | <b>0,01</b> |
| STM2679 | yfjD | 1,21        | 0,09        | <b>3,00</b> | <b>0,02</b> |
| STM2775 | iroD | 1,17        | 0,07        | 1,21        | 0,08        |
| STM2777 | iroN | <b>3,47</b> | <b>0,02</b> | <b>0,14</b> | <b>0,01</b> |
| STM2783 | nxiA | <b>2,12</b> | <b>0,04</b> | <b>0,19</b> | <b>0,00</b> |
| STM2798 | ygaP | <b>0,11</b> | <b>0,02</b> | 0,96        | 0,07        |
| STM2861 | sitA | 0,75        | 0,02        | <b>3,51</b> | <b>0,01</b> |
| STM2862 | sitB | 1,22        | 0,08        | <b>0,25</b> | <b>0,01</b> |
| STM2863 | sitC | <b>2,43</b> | <b>0,00</b> | <b>2,20</b> | <b>0,04</b> |
| STM2864 | sitD | 1,98        | 0,07        | <b>0,49</b> | <b>0,00</b> |
| STM2933 | cysC | 1,28        | 0,02        | 0,78        | 0,05        |
| STM2934 | cysN | 1,40        | 0,00        | 0,91        | 0,08        |
| STM2948 | cysJ | 1,28        | 0,03        | 0,93        | 0,06        |
| STM3006 | ygdQ | 1,85        | 0,03        | 0,69        | 0,04        |
| STM3073 |      | <b>2,17</b> | <b>0,00</b> | <b>2,19</b> | <b>0,04</b> |
| STM3074 |      | 1,31        | 0,08        | 0,78        | 0,08        |
| STM3075 |      | 1,05        | 0,09        | <b>2,55</b> | <b>0,02</b> |
| STM3122 |      | 0,64        | 0,06        | 1,46        | 0,08        |
| STM3141 |      | 1,06        | 0,10        | <b>0,46</b> | <b>0,02</b> |
| STM3142 |      | 0,71        | 0,01        | 1,72        | 0,05        |
| STM3166 |      | <b>2,06</b> | <b>0,01</b> | <b>4,31</b> | <b>0,01</b> |
| STM3190 | ygiE | 0,53        | 0,06        | <b>2,15</b> | <b>0,04</b> |
| STM3214 | yqjH | 1,07        | 0,05        | 1,98        | 0,06        |
| STM3224 | ygiT | 1,44        | 0,07        | 1,44        | 0,06        |
| STM3314 | yrbG | 1,35        | 0,01        | 0,98        | 0,10        |

|         |      |             |             |             |             |
|---------|------|-------------|-------------|-------------|-------------|
| STM3356 |      | 1,05        | 0,07        | 1,80        | 0,06        |
| STM3409 | trkA | 0,51        | 0,05        | <b>0,22</b> | <b>0,02</b> |
| STM3443 | bfr  | 1,11        | 0,06        | 1,50        | 0,06        |
| STM3444 | bfd  | 0,42        | 0,06        | <b>0,44</b> | <b>0,04</b> |
| STM3449 | yheL | 1,05        | 0,09        | 1,08        | 0,08        |
| STM3450 | yheM | 1,17        | 0,07        | 0,94        | 0,08        |
| STM3451 | yheN | 0,80        | 0,02        | 0,55        | 0,01        |
| STM3457 | kefB | 1,37        | 0,02        | 1,14        | 0,09        |
| STM3475 | nirD | 0,63        | 0,05        | 1,78        | 0,00        |
| STM3476 | nirC | 0,69        | 0,02        | 1,33        | 0,07        |
| STM3505 | feoA | 0,73        | 0,02        | 0,89        | 0,09        |
| STM3506 | feoB | 0,80        | 0,04        | 0,84        | 0,03        |
| STM3525 | glpE | 1,16        | 0,02        | 0,98        | 0,10        |
| STM3528 |      | <b>0,44</b> | <b>0,01</b> | 1,28        | 0,08        |
| STM3576 | zntA | 0,52        | 0,06        | 0,95        | 0,10        |
| STM3703 | yibN | 1,46        | 0,01        | 0,51        | 0,01        |
| STM3763 | mgtB | 1,04        | 0,08        | 1,02        | 0,09        |
| STM3820 |      | <b>0,39</b> | <b>0,05</b> | 1,64        | 0,05        |
| STM3853 | phoU | 0,93        | 0,08        | <b>0,40</b> | <b>0,02</b> |
| STM3854 | pstB |             |             |             |             |
| STM3855 | pstA |             |             |             |             |
| STM3856 | pstC |             |             |             |             |
| STM3857 | pstS |             |             |             |             |
| STM3880 | kup  | 1,21        | 0,08        | 1,88        | 0,04        |
| STM3943 | cyaY | 0,83        | 0,05        | 0,72        | 0,03        |
| STM3952 | corA | 0,82        | 0,05        | 0,81        | 0,01        |
| STM3986 | trkH | <b>0,45</b> | <b>0,02</b> | 1,16        | 0,09        |
| STM4055 | sodA | 1,05        | 0,08        | 0,65        | 0,07        |
| STM4061 | yiiP | 1,34        | 0,02        | 0,58        | 0,01        |
| STM4063 | sbp  | 1,02        | 0,09        | 0,72        | 0,04        |
| STM4106 | katG | 1,04        |             | 1,26        | 0,06        |
| STM4189 | yjbB | 1,62        | 0,02        | 1,36        | 0,07        |
| STM4241 | zur  | 1,47        | 0,07        | 0,73        | 0,03        |
| STM4269 | yjcE | 0,73        | 0,00        | 0,74        | 0,02        |
| STM4277 | nrfA | 1,03        | 0,08        | <b>2,13</b> | <b>0,05</b> |
| STM4280 | nrfD | 0,71        | 0,02        | 0,64        | 0,01        |
| STM4289 | phnA | <b>4,57</b> | <b>0,02</b> | 1,33        | 0,01        |
| STM4324 | cutA | 0,84        | 0,01        | 1,78        | 0,05        |
| STM4338 | sugE | 0,81        | 0,03        | 1,00        | 0,10        |
| STM4404 | cysQ | 1,22        | 0,00        | 0,84        | 0,02        |

### Islands

|         |  |      |      |             |             |
|---------|--|------|------|-------------|-------------|
| STM0014 |  | 1,07 | 0,06 | 0,64        | 0,02        |
| STM0015 |  | 0,87 | 0,04 | <b>2,69</b> | <b>0,05</b> |
| STM0016 |  | 1,00 | 0,10 | 1,35        | 0,05        |
| STM0017 |  | 1,00 | 0,10 | 1,56        | 0,04        |

|         |       |      |      |      |      |
|---------|-------|------|------|------|------|
| STM0018 |       | 0,12 | 0,03 | 0,64 | 0,00 |
| STM0019 |       | 1,08 | 0,06 | 0,70 | 0,03 |
| STM0020 |       | 0,91 | 0,06 | 2,80 | 0,05 |
| STM0021 | bcfA  | 1,00 | 0,10 | 0,14 | 0,00 |
| STM0022 | bcfB  | 1,02 | 0,09 | 1,67 | 0,06 |
| STM0023 | bcfC  | 0,80 | 0,01 | 7,46 | 0,02 |
| STM0024 | bcfD  | 0,39 | 0,00 | 2,02 | 0,04 |
| STM0025 | bcfE  | 0,72 | 0,01 | 1,54 | 0,04 |
| STM0026 | bcfF  | 0,23 | 0,03 | 0,18 | 0,00 |
| STM0027 | bcfG  | 1,08 | 0,05 | 0,59 | 0,01 |
| STM0028 | bcfH  | 0,81 | 0,05 | 2,21 | 0,05 |
| STM0029 |       | 0,98 | 0,09 | 1,38 | 0,05 |
| STM0030 |       | 1,07 | 0,08 | 1,14 | 0,06 |
| STM0031 |       | 1,08 | 0,05 | 0,61 | 0,02 |
| STM0032 |       | 1,00 | 0,10 | 0,90 | 0,06 |
| STM0033 |       | 2,15 | 0,06 | 1,52 | 0,01 |
| STM0034 |       | 0,82 | 0,03 | 2,46 | 0,05 |
| STM0035 |       | 3,49 | 0,00 | 5,31 | 0,01 |
| STM0036 |       | 5,75 | 0,03 | 1,12 | 0,09 |
| STM0037 |       | 0,99 | 0,10 | 1,63 | 0,04 |
| STM0038 |       | 4,27 | 0,03 | 1,27 | 0,08 |
| STM0052 |       | 0,49 | 0,03 | 5,23 | 0,00 |
| STM0053 |       | 1,67 | 0,01 | 1,54 | 0,05 |
| STM0055 |       | 0,99 | 0,10 | 0,98 | 0,09 |
| STM0056 |       | 0,51 |      | 1,21 | 0,08 |
| STM0057 |       | 1,11 | 0,08 | 1,37 | 0,07 |
| STM0058 | citC2 | 1,00 | 0,10 | 0,55 | 0,01 |
| STM0059 | citD2 | 0,94 | 0,05 | 0,73 | 0,03 |
| STM0060 | citE2 | 3,37 | 0,02 | 0,19 | 0,01 |
| STM0061 | citF2 | 1,28 | 0,03 | 1,94 | 0,07 |
| STM0062 | citX2 | 1,12 | 0,03 | 0,79 | 0,05 |
| STM0063 | citG2 | 0,75 | 0,00 | 1,75 | 0,05 |
| STM0174 | stiH  | 0,43 | 0,04 | 0,35 | 0,02 |
| STM0175 | stiC  |      |      |      |      |
| STM0176 | stiB  | 1,07 | 0,05 | 0,49 | 0,02 |
| STM0177 | stiA  | 1,06 | 0,07 | 1,03 | 0,10 |
| STM0195 | stfA  | 2,33 | 0,00 | 2,68 | 0,03 |
| STM0196 | stfC  | 0,74 | 0,01 | 1,24 | 0,07 |
| STM0197 | stfD  | 0,98 | 0,09 | 1,21 | 0,03 |
| STM0198 | stfE  | 0,84 | 0,04 | 0,75 | 0,01 |
| STM0199 | stfF  | 0,72 | 0,03 | 0,56 | 0,02 |
| STM0200 | stfG  | 0,90 | 0,07 | 0,80 | 0,03 |
| STM0266 |       | 0,62 | 0,04 | 1,74 | 0,07 |
| STM0267 |       | 0,84 | 0,02 | 1,34 | 0,07 |
| STM0269 |       | 0,32 | 0,04 | 1,29 | 0,07 |
| STM0270 |       | 1,14 | 0,05 | 2,36 | 0,04 |

|         |      |       |      |      |      |
|---------|------|-------|------|------|------|
| STM0271 |      | 0,63  | 0,05 | 5,77 | 0,02 |
| STM0273 |      | 0,89  | 0,05 | 0,72 | 0,02 |
| STM0274 |      | 0,85  | 0,06 | 0,67 | 0,03 |
| STM0275 |      | 1,96  | 0,00 | 2,53 | 0,04 |
| STM0276 |      | 1,01  | 0,10 | 1,09 | 0,07 |
| STM0277 |      | 0,46  | 0,01 | 1,33 | 0,01 |
| STM0278 |      | 0,81  | 0,03 | 0,84 | 0,02 |
| STM0279 |      | 0,73  | 0,01 | 1,62 | 0,06 |
| STM0280 |      | 0,74  | 0,06 | 0,58 | 0,07 |
| STM0281 |      | 3,34  | 0,02 | 0,17 | 0,01 |
| STM0282 |      | 0,88  | 0,06 | 0,68 | 0,03 |
| STM0284 |      | 1,90  | 0,00 | 2,53 | 0,03 |
| STM0286 |      | 0,93  | 0,08 | 1,27 | 0,01 |
| STM0287 |      | 0,77  | 0,02 | 0,78 | 0,02 |
| STM0288 |      | 0,83  | 0,05 | 0,69 | 0,03 |
| STM0289 |      | 1,11  | 0,08 | 1,17 | 0,09 |
| STM0290 |      | 0,47  | 0,05 | 1,04 | 0,09 |
| STM0292 |      | 2,10  | 0,01 | 0,64 | 0,07 |
| STM0293 |      | 15,90 | 0,00 | 0,42 | 0,05 |
| STM0294 |      | 0,93  | 0,07 | 1,33 | 0,01 |
| STM0295 |      | 0,99  | 0,10 | 1,33 | 0,05 |
| STM0296 |      | 0,87  | 0,05 | 0,74 | 0,01 |
| STM0297 |      | 30,94 | 0,05 |      |      |
| STM0298 |      | 0,77  | 0,01 | 1,21 | 0,06 |
| STM0299 | safA | 1,10  | 0,07 | 1,05 | 0,08 |
| STM0300 | safB | 1,98  | 0,01 | 2,37 | 0,04 |
| STM0301 | safC | 1,02  | 0,10 | 1,58 | 0,02 |
| STM0302 | safD | 11,54 | 0,02 | 0,16 | 0,01 |
| STM0303 | ybeJ | 1,42  | 0,07 | 0,34 | 0,00 |
| STM0304 | sinR | 0,91  | 0,03 | 2,81 | 0,04 |
| STM0305 |      | 0,64  | 0,00 | 0,91 | 0,07 |
| STM0306 |      | 1,19  | 0,08 | 2,76 | 0,03 |
| STM0307 |      | 0,86  | 0,05 | 1,20 | 0,01 |
| STM0329 |      | 0,88  | 0,04 | 1,41 | 0,05 |
| STM0330 |      | 1,24  | 0,08 | 0,16 | 0,00 |
| STM0331 |      | 1,08  | 0,06 | 0,51 | 0,02 |
| STM0332 |      | 0,15  | 0,00 | 4,70 | 0,02 |
| STM0333 |      | 0,28  | 0,03 | 0,31 | 0,02 |
| STM0334 |      | 0,69  | 0,06 | 0,24 | 0,01 |
| STM0335 |      | 0,85  | 0,03 | 2,46 | 0,05 |
| STM0336 | stbE | 0,88  | 0,08 | 0,74 | 0,05 |
| STM0337 | stbD | 0,95  | 0,10 | 0,68 | 0,05 |
| STM0338 | stbC | 0,52  | 0,02 | 6,27 | 0,00 |
| STM0339 | stbB | 1,04  | 0,07 | 8,45 | 0,02 |
| STM0340 | stbA | 0,64  | 0,02 | 0,90 | 0,09 |
| STM0341 |      | 0,37  | 0,00 | 1,46 | 0,04 |

|         |      |      |      |       |      |
|---------|------|------|------|-------|------|
| STM0342 |      | 1,03 | 0,09 | 1,04  | 0,09 |
| STM0343 |      | 2,12 | 0,03 | 1,17  | 0,08 |
| STM0344 |      | 3,09 | 0,04 | 0,91  | 0,06 |
| STM0345 |      | 1,01 | 0,10 | 1,40  | 0,01 |
| STM0346 |      | 0,84 | 0,04 | 0,62  | 0,03 |
| STM0347 |      | 0,67 | 0,08 | 0,47  | 0,04 |
| STM0348 |      | 0,21 | 0,00 | 4,06  | 0,06 |
| STM0349 |      | 0,76 | 0,01 | 1,63  | 0,06 |
| STM0350 |      | 1,13 | 0,08 | 1,17  | 0,09 |
| STM0351 |      | 0,79 | 0,02 | 0,75  | 0,02 |
| STM0352 |      | 3,65 | 0,02 | 0,14  | 0,01 |
| STM0354 |      | 0,35 | 0,02 | 1,11  | 0,06 |
| STM0355 |      | 0,16 | 0,03 | 10,53 | 0,01 |
| STM0356 |      | 0,01 | 0,10 | 4,84  | 0,04 |
| STM0357 | mod  | 1,00 | 0,10 | 0,96  | 0,04 |
| STM0358 | res  | 1,16 | 0,06 | 0,77  | 0,03 |
| STM0359 |      |      |      |       |      |
| STM0360 |      | 0,96 | 0,06 | 0,77  | 0,04 |
| STM0361 |      | 0,89 | 0,03 | 0,77  | 0,03 |
| STM0362 |      | 0,85 | 0,09 | 1,96  | 0,06 |
| STM0363 |      | 1,56 | 0,05 | 1,06  | 0,09 |
| STM0364 | foxA | 3,50 | 0,03 | 8,49  | 0,01 |
| STM0426 | phnV | 1,02 | 0,09 | 2,09  | 0,00 |
| STM0427 | phnU | 0,95 | 0,07 | 12,54 | 0,02 |
| STM0428 | phnT | 0,72 | 0,03 | 0,53  | 0,01 |
| STM0429 | phnS | 1,23 | 0,07 | 0,84  | 0,08 |
| STM0430 | phnR | 1,42 | 0,03 | 0,68  | 0,04 |
| STM0431 | phnW | 5,55 | 0,03 | 2,03  | 0,04 |
| STM0432 | phnX | 3,31 | 0,03 | 0,14  | 0,01 |
| STM0543 | fimA | 1,05 | 0,02 | 0,66  | 0,01 |
| STM0544 | fimI | 8,45 | 0,01 | 1,14  | 0,09 |
| STM0545 | fimC |      |      | 0,57  | 0,05 |
| STM0546 | fimD | 0,93 | 0,06 | 3,41  | 0,01 |
| STM0548 | fimF | 0,96 | 0,08 | 0,70  | 0,02 |
| STM0549 | fimZ | 0,79 | 0,07 | 0,96  | 0,09 |
| STM0550 | fimY | 0,16 | 0,02 | 9,19  | 0,03 |
| STM0551 |      | 1,02 | 0,09 | 0,46  | 0,02 |
| STM0552 | fimW | 0,73 | 0,03 | 1,23  | 0,05 |
| STM0571 |      | 1,09 | 0,07 | 1,27  | 0,08 |
| STM0572 |      | 0,23 | 0,03 | 0,71  | 0,07 |
| STM0573 |      | 1,31 | 0,01 | 0,61  | 0,05 |
| STM0574 |      | 0,99 | 0,09 | 0,51  | 0,02 |
| STM0575 |      | 1,09 | 0,05 | 1,48  | 0,07 |
| STM0576 |      | 0,78 | 0,01 | 1,65  | 0,03 |
| STM0577 |      | 1,01 | 0,10 | 1,14  | 0,09 |
| STM0715 |      | 0,11 | 0,02 | 0,55  | 0,02 |



|         |      |      |      |      |
|---------|------|------|------|------|
| STM0716 | 0,89 | 0,04 | 2,88 | 0,03 |
| STM0717 | 0,85 | 0,03 | 2,77 | 0,05 |
| STM0718 | 0,90 | 0,06 | 0,63 | 0,02 |
| STM0719 | 2,20 | 0,00 | 2,22 | 0,04 |
| STM0720 | 1,19 | 0,06 | 1,48 | 0,00 |
| STM0721 | 0,86 | 0,06 | 1,36 | 0,02 |
| STM0722 | 0,75 | 0,02 | 0,84 | 0,02 |
| STM0723 | 0,69 | 0,04 | 0,97 | 0,10 |
| STM0724 |      |      |      |      |
| STM0725 | 0,36 | 0,00 | 2,06 | 0,04 |
| STM0726 | 0,90 | 0,07 | 1,30 | 0,02 |
| STM0727 | 0,20 | 0,02 | 0,78 | 0,07 |
| STM0854 | 0,59 | 0,04 | 1,86 | 0,07 |
| STM0855 | 0,41 | 0,00 | 1,64 | 0,06 |
| STM0856 | 1,11 | 0,08 | 1,22 | 0,08 |
| STM0857 | 2,96 | 0,02 | 0,13 | 0,01 |
| STM0858 | 0,64 | 0,05 | 1,83 | 0,07 |
| STM0859 | 4,04 | 0,01 | 1,04 | 0,10 |
| STM0893 |      |      |      |      |
| STM0894 |      |      |      |      |
| STM0895 |      |      |      |      |
| STM0896 |      |      |      |      |
| STM0897 |      |      |      |      |
| STM0898 |      |      |      |      |
| STM0899 | 1,01 | 0,10 | 1,46 | 0,01 |
| STM0900 |      |      |      |      |
| STM0901 |      |      |      |      |
| STM0902 |      |      |      |      |
| STM0903 |      |      |      |      |
| STM0904 |      |      |      |      |
| STM0905 |      |      |      |      |
| STM0906 |      |      |      |      |
| STM0907 | 0,87 | 0,03 | 1,03 | 0,09 |
| STM0908 | 0,25 |      |      |      |
| STM0909 | 1,69 | 0,04 | 0,95 | 0,08 |
| STM0910 |      |      |      |      |
| STM0911 |      |      |      |      |
| STM0912 |      |      |      |      |
| STM0914 |      |      |      |      |
| STM0915 |      |      |      |      |
| STM0916 |      |      |      |      |
| STM0917 |      |      |      |      |
| STM0918 |      |      |      |      |
| STM0919 |      |      |      |      |
| STM0920 |      |      |      |      |
| STM0921 |      |      |      |      |

|         |      |      |      |       |      |
|---------|------|------|------|-------|------|
| STM0922 |      | 0,23 | 0,00 | 1,45  | 0,02 |
| STM0923 |      |      |      |       |      |
| STM0924 |      |      |      |       |      |
| STM0925 |      |      |      |       |      |
| STM0926 |      | 2,09 | 0,01 | 0,36  | 0,04 |
| STM0927 |      | 0,86 | 0,03 | 0,95  | 0,08 |
| STM0928 | nanH | 0,92 | 0,07 | 1,30  | 0,08 |
| STM0929 |      |      |      |       |      |
| STM0930 | orfB | 1,04 | 0,09 | 1,38  | 0,08 |
| STM0931 | ybjR | 1,00 | 0,10 | 0,49  | 0,01 |
| STM1005 |      | 0,82 | 0,08 | 0,96  | 0,10 |
| STM1006 |      | 0,86 | 0,00 | 1,71  | 0,05 |
| STM1007 |      | 0,97 | 0,08 | 1,62  | 0,07 |
| STM1008 |      | 1,04 | 0,09 | 1,18  | 0,07 |
| STM1009 |      | 1,09 | 0,06 | 2,35  | 0,04 |
| STM1011 |      | 2,50 | 0,04 | 0,58  | 0,02 |
| STM1012 |      | 1,04 | 0,06 | 0,78  | 0,06 |
| STM1013 |      | 1,03 | 0,09 | 0,84  | 0,02 |
| STM1014 |      | 6,53 | 0,03 | 0,40  | 0,04 |
| STM1015 |      | 1,03 | 0,08 | 0,56  | 0,02 |
| STM1016 |      | 1,06 | 0,06 | 2,09  | 0,05 |
| STM1017 |      | 0,85 | 0,03 | 0,85  | 0,06 |
| STM1018 |      | 1,02 | 0,09 | 0,73  | 0,03 |
| STM1019 |      | 0,52 | 0,02 | 0,78  | 0,05 |
| STM1020 |      | 3,69 | 0,02 | 0,18  | 0,01 |
| STM1021 |      | 0,92 | 0,05 | 2,83  | 0,02 |
| STM1022 |      |      |      |       |      |
| STM1023 |      |      |      |       |      |
| STM1024 |      |      |      | 11,39 | 0,01 |
| STM1025 |      | 1,24 | 0,08 | 0,48  | 0,03 |
| STM1026 |      | 1,14 | 0,09 | 0,37  | 0,03 |
| STM1027 |      | 3,64 | 0,02 | 0,17  | 0,01 |
| STM1028 |      | 0,74 | 0,03 | 2,61  | 0,04 |
| STM1029 |      |      |      | 1,38  |      |
| STM1030 |      |      |      |       |      |
| STM1031 |      |      |      |       |      |
| STM1032 |      |      |      |       |      |
| STM1033 |      |      |      |       |      |
| STM1034 |      |      |      |       |      |
| STM1035 |      |      |      |       |      |
| STM1036 |      |      |      |       |      |
| STM1037 |      |      |      |       |      |
| STM1038 |      |      |      |       |      |
| STM1039 |      |      |      |       |      |
| STM1040 |      |      |      |       |      |
| STM1041 |      | 0,52 | 0,00 | 6,43  | 0,01 |

|         |      |       |      |      |      |
|---------|------|-------|------|------|------|
| STM1042 |      | 1,16  | 0,03 | 1,06 | 0,09 |
| STM1043 |      | 0,68  | 0,02 | 1,06 | 0,09 |
| STM1044 | sodC | 1,08  | 0,08 | 0,64 | 0,01 |
| STM1045 |      | 1,85  | 0,03 | 0,82 | 0,02 |
| STM1046 |      | 2,93  | 0,03 | 0,53 | 0,02 |
| STM1047 |      | 1,01  | 0,10 | 2,38 | 0,05 |
| STM1048 |      | 1,03  | 0,10 | 0,52 | 0,05 |
| STM1050 |      | 1,48  | 0,06 | 1,59 | 0,04 |
| STM1051 | sseI | 4,13  | 0,02 | 0,16 | 0,01 |
| STM1052 |      | 1,06  | 0,10 | 1,55 | 0,05 |
| STM1053 |      | 1,03  | 0,08 | 1,04 | 0,10 |
| STM1054 |      | 0,62  | 0,04 | 1,80 | 0,07 |
| STM1055 |      | 7,66  | 0,00 | 0,34 | 0,00 |
| STM1056 |      | 1,46  | 0,04 | 2,49 | 0,01 |
| STM1087 | pipA | 0,74  | 0,03 | 0,71 | 0,06 |
| STM1088 | pipB | 6,91  | 0,00 | 0,66 | 0,03 |
| STM1089 |      | 1,05  | 0,08 | 1,71 | 0,02 |
| STM1090 | pipC | 1,25  | 0,06 | 1,29 | 0,08 |
| STM1091 | sopB | 0,63  | 0,04 | 0,50 | 0,00 |
| STM1092 | orfX | 0,52  | 0,03 | 0,40 | 0,06 |
| STM1093 |      |       |      |      |      |
| STM1094 | pipD | 1,02  | 0,09 | 0,56 | 0,03 |
| STM1113 | scsA | 1,66  | 0,06 | 0,20 | 0,01 |
| STM1114 | scsB | 0,65  | 0,05 | 1,01 | 0,10 |
| STM1115 | scsC | 0,74  | 0,01 | 0,86 | 0,08 |
| STM1116 | scsD | 1,09  | 0,09 | 0,76 | 0,07 |
| STM1127 |      | 0,95  | 0,09 | 0,84 | 0,08 |
| STM1128 |      | 0,27  | 0,00 | 6,43 | 0,00 |
| STM1129 |      | 1,04  | 0,09 | 2,35 | 0,03 |
| STM1130 |      | 0,91  | 0,04 | 2,56 | 0,05 |
| STM1131 |      | 1,05  | 0,08 | 1,34 | 0,05 |
| STM1132 |      | 0,74  | 0,01 | 1,50 | 0,04 |
| STM1133 |      | 0,84  | 0,01 | 0,91 | 0,07 |
| STM1139 | csgG | 0,81  | 0,06 | 1,44 | 0,05 |
| STM1140 | csgF | 0,84  | 0,02 | 0,68 | 0,03 |
| STM1141 | csgE | 0,85  | 0,04 | 2,51 | 0,05 |
| STM1142 | csgD | 1,09  | 0,07 | 2,66 | 0,01 |
| STM1143 | csgB | 0,77  | 0,04 | 1,42 | 0,07 |
| STM1144 | csgA | 0,26  | 0,02 | 0,28 | 0,01 |
| STM1145 | csgC | 0,74  | 0,01 | 1,69 | 0,03 |
| STM1171 | flgN | 0,10  | 0,00 | 4,35 | 0,01 |
| STM1172 | flgM | 0,12  | 0,05 | 2,99 | 0,00 |
| STM1173 | flgA | 2,46  | 0,04 | 0,65 | 0,03 |
| STM1174 | flgB | 20,72 |      | 0,53 | 0,02 |
| STM1175 | flgC | 1,13  | 0,04 | 0,68 | 0,03 |
| STM1176 | flgD | 0,76  | 0,01 | 1,62 | 0,03 |

|         |        |      |      |       |      |
|---------|--------|------|------|-------|------|
| STM1177 | flgE   | 0,86 | 0,02 | 3,33  | 0,01 |
| STM1178 | flgF   | 1,13 | 0,04 | 0,62  | 0,02 |
| STM1179 | flgG   | 0,88 | 0,04 | 2,55  | 0,05 |
| STM1180 | flgH   | 4,02 | 0,02 | 1,79  | 0,06 |
| STM1181 | flgI   | 1,10 | 0,04 | 0,66  | 0,02 |
| STM1182 | flgJ   | 0,84 | 0,02 | 6,84  | 0,02 |
| STM1183 | flgK   | 0,79 | 0,02 | 0,61  | 0,00 |
| STM1184 | flgL   | 0,94 | 0,10 | 0,58  | 0,06 |
| STM1239 |        | 0,58 | 0,03 | 2,10  | 0,06 |
| STM1240 | envF   | 1,04 | 0,07 | 1,89  | 0,05 |
| STM1241 | msgA   | 2,43 | 0,00 | 2,07  | 0,01 |
| STM1242 | envE   | 1,03 | 0,10 | 15,21 | 0,00 |
| STM1243 |        | 1,85 | 0,01 | 1,26  | 0,03 |
| STM1244 | pagD   | 4,23 | 0,04 | 0,36  | 0,02 |
| STM1246 | pagC   | 1,54 | 0,00 | 0,79  | 0,08 |
| STM1249 |        | 1,21 | 0,04 | 1,73  | 0,06 |
| STM1250 |        | 0,69 | 0,01 | 0,82  | 0,06 |
| STM1251 |        | 0,62 | 0,00 | 0,18  | 0,00 |
| STM1252 |        | 0,88 | 0,02 | 1,13  | 0,06 |
| STM1253 |        | 0,90 | 0,00 | 0,71  | 0,00 |
| STM1255 |        | 0,85 | 0,02 | 1,46  | 0,07 |
| STM1256 |        | 1,20 | 0,07 | 1,35  | 0,07 |
| STM1257 |        | 3,79 | 0,02 | 0,18  | 0,01 |
| STM1258 |        | 0,65 | 0,05 | 4,62  | 0,03 |
| STM1259 |        | 0,69 | 0,01 | 1,55  | 0,06 |
| STM1260 |        | 0,82 | 0,03 | 1,02  | 0,09 |
| STM1261 |        | 0,31 | 0,00 | 3,10  | 0,02 |
| STM1264 | aadA   | 0,84 | 0,02 | 0,68  | 0,01 |
| STM1265 |        | 3,06 | 0,00 | 0,94  | 0,09 |
| STM1267 |        | 1,27 | 0,04 | 0,84  | 0,09 |
| STM1268 |        | 7,98 | 0,02 | 11,11 |      |
| STM1269 |        | 1,51 | 0,01 | 1,56  | 0,07 |
| STM1328 |        | 1,62 | 0,06 | 0,86  | 0,08 |
| STM1330 |        | 1,00 | 0,10 | 2,78  | 0,04 |
| STM1331 |        | 0,72 | 0,01 | 0,71  | 0,02 |
| STM1379 | orf48  | 1,23 | 0,02 | 1,04  | 0,10 |
| STM1380 | orf32  | 1,17 | 0,05 | 2,12  | 0,05 |
| STM1381 | orf245 | 1,08 | 0,09 | 1,16  | 0,09 |
| STM1382 | orf408 | 0,94 | 0,08 | 1,61  | 0,00 |
| STM1383 | ttrA   | 1,51 | 0,02 | 1,04  | 0,07 |
| STM1384 | ttrC   | 0,86 | 0,03 | 2,67  | 0,05 |
| STM1386 | ttrS   | 0,28 | 0,04 | 0,86  | 0,08 |
| STM1387 | ttrR   | 3,25 | 0,03 | 1,98  | 0,05 |
| STM1388 | orf70  | 0,39 | 0,03 | 0,50  | 0,01 |
| STM1389 | orf319 | 1,29 | 0,07 | 0,64  | 0,01 |
| STM1390 | orf242 | 0,84 | 0,04 | 0,41  | 0,02 |

|         |      |      |      |       |      |
|---------|------|------|------|-------|------|
| STM1391 | ssrB | 0,99 | 0,09 | 0,59  | 0,02 |
| STM1392 | ssrA | 0,70 | 0,04 | 0,65  | 0,03 |
| STM1393 | ssaB | 1,09 | 0,09 | 0,15  | 0,01 |
| STM1394 | ssaC | 1,31 | 0,06 | 1,90  | 0,06 |
| STM1396 | ssaE | 1,01 | 0,10 | 0,95  | 0,08 |
| STM1397 | sseA | 0,85 | 0,06 | 0,88  | 0,09 |
| STM1398 | sseB | 1,31 | 0,06 | 0,94  | 0,09 |
| STM1399 | sscA | 3,40 | 0,02 | 0,22  | 0,02 |
| STM1400 | sseC | 1,30 | 0,03 | 0,84  | 0,09 |
| STM1401 | sseD | 1,50 | 0,01 | 0,74  | 0,04 |
| STM1402 | sseE | 1,11 | 0,06 | 0,55  | 0,02 |
| STM1403 | sscB | 0,84 | 0,05 | 6,97  | 0,00 |
| STM1404 | sseF | 0,66 | 0,03 | 1,89  | 0,06 |
| STM1405 | sseG | 0,27 | 0,01 | 0,77  | 0,08 |
| STM1406 | ssaG | 3,55 | 0,02 | 0,13  | 0,02 |
| STM1407 | ssaH | 0,91 | 0,09 | 0,78  | 0,09 |
| STM1408 | ssal | 1,03 | 0,09 | 0,95  | 0,10 |
| STM1409 | ssaj | 1,51 | 0,04 | 0,71  | 0,08 |
| STM1411 | ssaK | 0,23 | 0,04 | 0,49  | 0,03 |
| STM1412 | ssaL | 1,54 | 0,01 | 0,52  | 0,05 |
| STM1413 | ssaM | 0,20 | 0,01 | 0,20  |      |
| STM1414 | ssaV | 0,32 | 0,04 | 0,28  | 0,00 |
| STM1415 | ssaN | 0,51 | 0,00 | 0,55  | 0,02 |
| STM1416 | ssaO | 1,04 | 0,08 | 0,47  | 0,06 |
| STM1417 | ssaP | 2,29 | 0,05 | 3,99  | 0,02 |
| STM1419 | ssaR | 1,05 | 0,09 | 0,50  | 0,03 |
| STM1420 | ssaS | 1,70 | 0,06 | 0,28  | 0,00 |
| STM1421 | ssaT | 0,59 | 0,07 | 0,36  | 0,01 |
| STM1422 | ssaU | 0,35 | 0,00 | 4,29  | 0,02 |
| STM1491 |      | 0,93 | 0,07 | 0,81  | 0,05 |
| STM1492 |      | 1,27 | 0,08 | 0,23  | 0,01 |
| STM1493 |      | 0,91 | 0,06 | 0,71  | 0,07 |
| STM1494 |      | 2,26 | 0,00 | 2,36  | 0,04 |
| STM1495 | ynfl | 1,13 | 0,06 | 0,69  | 0,04 |
| STM1528 |      | 0,69 | 0,02 | 1,42  | 0,05 |
| STM1529 |      | 1,09 | 0,09 | 1,32  | 0,08 |
| STM1530 |      | 3,34 | 0,02 | 0,20  | 0,01 |
| STM1531 |      | 2,38 |      | 37,43 | 0,05 |
| STM1532 |      | 0,72 | 0,07 | 2,98  | 0,02 |
| STM1533 |      | 1,11 | 0,06 | 1,13  | 0,09 |
| STM1534 |      | 0,89 | 0,05 | 1,05  | 0,08 |
| STM1535 |      | 0,90 | 0,05 | 0,71  | 0,01 |
| STM1536 |      | 0,89 | 0,09 | 2,61  | 0,00 |
| STM1537 |      | 0,97 | 0,10 | 1,54  | 0,06 |
| STM1538 |      | 1,04 | 0,10 | 0,82  | 0,09 |
| STM1539 |      | 0,65 | 0,01 | 0,49  | 0,00 |

|         |      |       |      |       |      |
|---------|------|-------|------|-------|------|
| STM1540 |      | 1,17  | 0,06 | 0,65  | 0,05 |
| STM1541 |      | 18,59 | 0,00 | 0,79  | 0,08 |
| STM1542 |      | 2,73  | 0,04 | 1,36  | 0,06 |
| STM1543 |      | 1,08  | 0,05 | 1,71  | 0,06 |
| STM1544 | pqaA | 1,42  | 0,07 | 0,35  | 0,01 |
| STM1545 |      | 0,33  | 0,03 | 5,57  | 0,02 |
| STM1546 |      | 1,95  | 0,00 | 2,23  | 0,04 |
| STM1547 |      | 10,08 | 0,04 | 0,21  | 0,00 |
| STM1548 |      | 0,71  | 0,02 | 0,75  | 0,04 |
| STM1549 |      | 1,43  | 0,07 | 2,76  | 0,00 |
| STM1550 |      | 0,76  | 0,08 | 1,14  | 0,08 |
| STM1551 |      | 1,44  | 0,03 | 1,03  | 0,09 |
| STM1552 |      | 1,37  | 0,07 | 0,38  | 0,01 |
| STM1553 |      | 0,92  | 0,08 | 0,71  | 0,03 |
| STM1554 |      | 0,52  | 0,03 | 0,85  | 0,08 |
| STM1555 |      | 1,04  | 0,09 | 4,14  | 0,02 |
| STM1556 |      | 1,28  | 0,08 | 0,09  | 0,00 |
| STM1557 |      | 0,71  | 0,01 | 0,75  | 0,01 |
| STM1558 |      | 0,23  | 0,04 | 0,64  | 0,00 |
| STM1559 |      | 0,99  | 0,10 | 0,57  | 0,01 |
| STM1560 |      | 7,27  | 0,00 | 0,82  | 0,08 |
| STM1561 |      | 3,05  | 0,00 | 2,64  | 0,03 |
| STM1562 |      | 0,28  | 0,04 | 0,57  | 0,01 |
| STM1599 | pdgL | 1,24  | 0,01 | 0,95  | 0,08 |
| STM1600 |      | 0,59  | 0,07 | 1,98  | 0,03 |
| STM1601 | ugtL | 1,04  | 0,08 | 0,56  | 0,02 |
| STM1602 | sifB | 1,49  | 0,01 | 1,22  | 0,09 |
| STM1629 |      | 0,23  | 0,00 | 8,49  | 0,02 |
| STM1630 |      | 0,93  | 0,08 | 1,70  | 0,03 |
| STM1631 | sseJ | 2,41  | 0,03 | 1,17  | 0,09 |
| STM1632 |      | 2,00  | 0,03 | 0,56  | 0,02 |
| STM1633 |      | 0,90  | 0,05 | 10,58 | 0,02 |
| STM1634 |      | 1,02  | 0,09 | 1,45  | 0,04 |
| STM1635 |      | 1,11  | 0,07 | 1,18  | 0,06 |
| STM1636 |      | 1,04  | 0,09 | 1,18  | 0,08 |
| STM1637 |      | 3,30  | 0,02 | 0,13  | 0,01 |
| STM1638 |      | 1,78  | 0,07 | 1,71  | 0,06 |
| STM1664 |      | 1,58  | 0,00 | 0,79  | 0,06 |
| STM1665 |      | 3,58  | 0,02 | 0,15  | 0,01 |
| STM1666 |      | 0,44  | 0,05 | 0,69  | 0,03 |
| STM1667 |      | 0,72  | 0,08 | 1,24  | 0,09 |
| STM1668 |      | 0,73  | 0,01 | 1,52  | 0,06 |
| STM1669 |      | 1,18  | 0,03 | 2,28  | 0,04 |
| STM1670 |      | 0,99  | 0,10 | 1,25  | 0,08 |
| STM1671 |      | 2,80  | 0,03 | 0,15  | 0,01 |
| STM1672 |      | 2,10  | 0,03 | 1,22  | 0,09 |

|         |       |      |      |       |      |
|---------|-------|------|------|-------|------|
| STM1673 |       | 0,32 | 0,04 | 0,52  | 0,06 |
| STM1855 | sopE2 | 0,81 | 0,08 | 0,45  | 0,02 |
| STM1856 |       | 0,97 | 0,08 | 2,99  | 0,04 |
| STM1857 |       | 1,25 | 0,02 | 0,63  | 0,06 |
| STM1858 |       | 0,08 | 0,00 | 0,78  | 0,08 |
| STM1859 |       | 0,13 | 0,00 | 3,87  | 0,03 |
| STM1860 |       | 1,01 | 0,10 | 1,26  | 0,05 |
| STM1862 | pagO  | 0,68 | 0,08 | 0,43  | 0,04 |
| STM1864 |       | 2,42 | 0,05 | 0,60  | 0,02 |
| STM1865 |       | 5,65 | 0,02 | 0,14  | 0,00 |
| STM1866 |       | 0,83 | 0,04 | 0,79  | 0,08 |
| STM1867 | pagK  | 1,65 | 0,02 | 1,86  | 0,06 |
| STM1868 | mig-3 | 4,26 | 0,01 | 3,61  | 0,02 |
| STM1869 |       | 0,90 | 0,05 | 2,80  | 0,05 |
| STM1911 |       | 1,00 | 0,10 | 0,61  | 0,02 |
| STM1915 | cheZ  | 0,63 | 0,01 | 1,72  | 0,06 |
| STM1916 | cheY  | 1,57 | 0,07 | 10,57 | 0,00 |
| STM1917 | cheB  | 0,69 | 0,01 | 0,45  | 0,03 |
| STM1918 | cheR  | 0,66 | 0,02 | 0,80  | 0,00 |
| STM1920 | cheW  | 0,92 | 0,10 | 0,42  | 0,03 |
| STM1921 | cheA  | 1,01 | 0,10 | 0,54  | 0,01 |
| STM1922 | motB  | 3,76 | 0,02 | 0,17  | 0,01 |
| STM1923 | motA  | 1,04 | 0,09 | 1,59  | 0,06 |
| STM1924 | flhC  | 0,86 | 0,07 | 0,61  | 0,06 |
| STM1925 | flhD  | 1,01 | 0,10 | 1,02  | 0,10 |
| STM2019 | cbiP  | 1,47 | 0,01 | 0,69  | 0,08 |
| STM2020 | cbiO  | 1,06 | 0,03 | 0,77  | 0,02 |
| STM2021 | cboQ  | 0,96 | 0,06 | 1,53  | 0,01 |
| STM2022 | cbiN  | 0,40 | 0,01 | 0,62  | 0,00 |
| STM2023 | cbiM  | 0,87 | 0,02 | 0,67  | 0,02 |
| STM2024 | cbiL  | 0,79 | 0,02 | 0,89  | 0,01 |
| STM2025 | cbiK  | 1,39 | 0,02 | 1,26  | 0,08 |
| STM2026 | cbiJ  | 2,51 | 0,02 | 0,19  | 0,00 |
| STM2027 | cbiH  | 1,22 | 0,07 | 0,66  | 0,04 |
| STM2028 | cbiG  | 1,04 | 0,07 | 0,84  | 0,08 |
| STM2029 | cbiF  | 0,70 | 0,06 | 1,31  | 0,08 |
| STM2030 | cbiT  | 3,22 | 0,02 | 0,14  | 0,00 |
| STM2031 | cbiE  | 0,97 | 0,09 | 0,63  | 0,02 |
| STM2032 | cbiD  | 1,19 | 0,04 | 0,82  | 0,08 |
| STM2033 | cbiC  | 0,58 | 0,04 | 1,53  | 0,07 |
| STM2034 | cibB  | 1,79 | 0,05 | 0,16  | 0,00 |
| STM2037 | pduF  | 1,15 | 0,06 | 0,79  | 0,03 |
| STM2038 | pduA  | 0,87 | 0,03 | 0,52  | 0,01 |
| STM2039 | pudB  | 1,03 | 0,09 | 1,53  | 0,07 |
| STM2040 | pduC  | 0,99 | 0,08 | 0,74  | 0,01 |
| STM2041 | pduD  | 0,94 | 0,04 | 0,69  | 0,01 |

|         |      |       |      |      |      |
|---------|------|-------|------|------|------|
| STM2042 | pduE | 0,99  | 0,09 | 0,59 | 0,00 |
| STM2043 | pduG | 0,87  | 0,01 | 0,62 | 0,01 |
| STM2044 | pduH | 1,00  | 0,10 | 1,54 | 0,07 |
| STM2045 | pduJ | 1,07  | 0,05 | 0,75 | 0,03 |
| STM2046 | pduK | 1,08  | 0,02 | 0,70 | 0,01 |
| STM2047 | pduL | 0,99  | 0,09 | 0,61 | 0,00 |
| STM2048 | pduM | 0,73  | 0,05 | 1,32 | 0,08 |
| STM2049 | pduN | 1,08  | 0,07 | 1,11 | 0,08 |
| STM2050 | pduO | 0,81  | 0,04 | 0,70 | 0,07 |
| STM2051 | pduP | 1,01  | 0,10 | 0,76 | 0,07 |
| STM2052 | pduQ | 1,30  | 0,03 | 0,99 | 0,09 |
| STM2053 | pduS | 0,75  | 0,00 | 0,55 | 0,00 |
| STM2054 | pduT | 0,78  | 0,08 | 0,27 | 0,00 |
| STM2055 | pduU | 0,69  | 0,08 | 1,52 | 0,01 |
| STM2056 | pduV | 0,67  | 0,02 | 0,93 | 0,03 |
| STM2057 | pduW | 2,08  | 0,01 | 0,30 | 0,02 |
| STM2058 | pduX | 1,76  | 0,05 | 0,71 | 0,07 |
| STM2063 | phsC | 0,76  | 0,07 | 3,65 | 0,00 |
| STM2064 | phsB | 8,34  | 0,05 | 0,74 | 0,03 |
| STM2065 | phsA | 1,19  | 0,04 | 0,88 | 0,08 |
| STM2082 | rfbP | 0,64  | 0,04 | 1,00 | 0,10 |
| STM2083 | rfbK | 2,58  | 0,02 | 0,79 | 0,06 |
| STM2084 | rfbM | 0,55  | 0,07 | 1,19 | 0,06 |
| STM2085 | rfbN | 2,55  | 0,04 | 0,23 | 0,01 |
| STM2086 | rfbU | 11,86 | 0,00 | 0,19 | 0,03 |
| STM2087 | rfbV | 0,82  | 0,09 | 0,27 | 0,00 |
| STM2088 | rfbX | 0,98  | 0,09 | 1,00 | 0,10 |
| STM2089 | rfbJ | 0,73  | 0,00 | 1,20 | 0,05 |
| STM2090 | rfbH | 0,92  | 0,01 | 0,78 | 0,02 |
| STM2091 | rfbG | 1,22  | 0,01 | 0,61 | 0,00 |
| STM2092 | rfbF | 0,96  | 0,08 | 1,15 | 0,08 |
| STM2093 | rfbI | 1,00  | 0,10 | 0,72 | 0,07 |
| STM2149 | stcD | 1,00  | 0,10 | 1,30 | 0,08 |
| STM2150 | stcC | 0,94  | 0,09 | 1,20 | 0,08 |
| STM2151 | stcB | 1,05  | 0,05 | 0,45 | 0,02 |
| STM2152 | stcA | 0,32  | 0,00 | 2,11 | 0,03 |
| STM2175 |      | 6,52  | 0,00 | 0,41 | 0,05 |
| STM2176 |      | 3,68  | 0,02 | 0,14 | 0,01 |
| STM2177 |      | 0,63  | 0,05 | 1,69 | 0,07 |
| STM2178 |      | 0,78  | 0,01 | 1,45 | 0,04 |
| STM2179 |      | 0,94  | 0,06 | 0,93 | 0,07 |
| STM2180 |      | 1,80  | 0,04 | 0,67 | 0,03 |
| STM2230 |      | 0,89  | 0,06 | 1,62 | 0,04 |
| STM2231 |      | 0,72  | 0,03 | 0,64 | 0,02 |
| STM2232 | oafA | 1,46  | 0,05 | 2,24 | 0,02 |
| STM2233 |      | 0,86  | 0,02 | 0,95 | 0,08 |



|         |       |      |      |      |      |
|---------|-------|------|------|------|------|
| STM2234 |       | 0,99 | 0,08 | 0,50 | 0,02 |
| STM2235 |       | 2,16 | 0,00 | 2,47 | 0,04 |
| STM2236 |       | 0,96 | 0,09 | 1,25 | 0,01 |
| STM2237 |       | 0,76 | 0,01 | 0,71 | 0,00 |
| STM2239 |       | 1,12 | 0,04 | 3,30 | 0,02 |
| STM2240 |       | 0,73 | 0,04 | 0,65 | 0,02 |
| STM2241 | sspH2 | 0,73 | 0,05 | 1,02 | 0,10 |
| STM2242 |       | 0,86 | 0,06 | 0,65 | 0,03 |
| STM2243 |       | 3,81 | 0,02 | 0,13 | 0,01 |
| STM2244 |       | 2,03 | 0,01 | 0,29 | 0,06 |
| STM2340 |       | 0,37 | 0,00 | 2,06 | 0,04 |
| STM2341 |       | 0,93 | 0,08 | 1,37 | 0,01 |
| STM2342 |       | 0,82 | 0,03 | 0,84 | 0,02 |
| STM2343 |       | 1,69 | 0,06 | 0,65 | 0,02 |
| STM2344 |       | 2,25 | 0,00 | 5,91 | 0,01 |
| STM2345 |       | 0,80 | 0,04 | 0,49 | 0,01 |
| STM2357 |       | 0,89 | 0,06 | 1,19 | 0,04 |
| STM2358 |       | 2,06 | 0,06 | 0,68 | 0,06 |
| STM2359 |       | 1,70 | 0,07 | 0,41 | 0,01 |
| STM2360 |       | 0,54 | 0,00 | 0,53 | 0,01 |
| STM2361 |       | 1,09 | 0,05 | 1,73 | 0,05 |
| STM2395 | pgtE  | 1,04 | 0,08 | 1,17 | 0,08 |
| STM2396 | pgtA  | 0,29 | 0,00 | 0,56 | 0,01 |
| STM2397 | pgtB  | 0,94 | 0,10 | 6,64 | 0,00 |
| STM2398 | pgtC  | 2,70 | 0,04 | 3,00 | 0,04 |
| STM2399 | pgtP  | 3,04 | 0,03 | 0,46 | 0,04 |
| STM2514 | ratB  | 0,76 | 0,01 | 2,47 | 0,00 |
| STM2516 | sinI  | 0,86 | 0,03 | 0,96 | 0,09 |
| STM2518 | yfgJ  | 3,00 |      | 0,19 | 0,01 |
| STM2584 | gogB  | 5,71 | 0,02 | 2,68 | 0,02 |
| STM2585 |       | 1,36 | 0,02 | 0,64 | 0,02 |
| STM2586 |       | 0,89 | 0,09 | 3,07 | 0,02 |
| STM2587 |       | 0,82 | 0,05 | 0,76 | 0,03 |
| STM2590 |       | 2,23 | 0,00 | 1,96 | 0,05 |
| STM2591 |       | 1,02 | 0,09 | 1,29 | 0,01 |
| STM2592 |       | 0,73 | 0,02 | 0,80 | 0,02 |
| STM2593 |       | 0,79 | 0,04 | 0,70 | 0,02 |
| STM2594 |       | 0,14 | 0,00 | 6,86 | 0,01 |
| STM2595 |       | 0,53 | 0,01 | 1,38 | 0,07 |
| STM2596 |       | 1,05 | 0,07 | 1,01 | 0,10 |
| STM2597 |       | 0,78 | 0,07 | 0,39 | 0,01 |
| STM2598 |       | 0,17 | 0,00 | 5,15 | 0,01 |
| STM2599 |       | 0,42 | 0,01 | 1,01 | 0,10 |
| STM2600 |       | 1,99 | 0,04 | 0,44 | 0,03 |
| STM2602 |       | 1,12 | 0,03 | 0,52 | 0,02 |
| STM2603 |       | 1,10 | 0,04 | 1,96 | 0,05 |

|         |      |      |      |      |
|---------|------|------|------|------|
| STM2604 | 0,75 | 0,01 | 1,67 | 0,04 |
| STM2605 | 0,90 | 0,05 | 0,95 | 0,08 |
| STM2606 | 0,63 | 0,00 | 0,38 | 0,04 |
| STM2607 |      |      | 0,20 |      |
| STM2608 | 0,77 | 0,01 | 1,67 | 0,03 |
| STM2609 | 0,92 | 0,06 | 1,01 | 0,09 |
| STM2610 | 0,26 | 0,04 | 1,33 | 0,01 |
| STM2611 | 1,15 | 0,04 | 0,46 | 0,01 |
| STM2613 | 0,77 | 0,02 | 1,77 | 0,03 |
| STM2614 | 1,24 | 0,07 | 0,85 | 0,07 |
| STM2616 | 1,90 | 0,04 | 0,68 | 0,04 |
| STM2617 | 1,06 | 0,07 | 2,24 | 0,05 |
| STM2618 | 0,57 | 0,05 | 0,01 | 0,00 |
| STM2620 | 0,94 | 0,02 | 1,16 | 0,08 |
| STM2630 | 0,24 | 0,01 | 0,85 | 0,07 |
| STM2635 | 1,03 | 0,09 | 1,48 | 0,04 |
| STM2636 | 2,67 | 0,00 | 2,18 | 0,04 |
| STM2694 |      |      |      |      |
| STM2695 |      |      |      |      |
| STM2696 |      |      |      |      |
| STM2697 |      |      |      |      |
| STM2698 |      |      |      |      |
| STM2699 | 0,23 | 0,03 | 0,38 | 0,04 |
| STM2700 |      |      |      |      |
| STM2701 |      |      |      |      |
| STM2702 |      |      |      |      |
| STM2703 |      |      |      |      |
| STM2704 | 0,57 | 0,05 | 0,50 | 0,00 |
| STM2705 |      |      |      |      |
| STM2706 | 0,03 | 0,00 | 1,55 | 0,04 |
| STM2707 |      |      |      |      |
| STM2708 |      |      |      |      |
| STM2709 |      |      |      |      |
| STM2710 | 0,82 | 0,03 | 0,54 | 0,01 |
| STM2711 | 1,83 | 0,03 | 0,52 | 0,00 |
| STM2712 | 1,01 | 0,09 | 0,77 | 0,04 |
| STM2713 |      |      |      |      |
| STM2714 |      |      |      |      |
| STM2715 |      |      |      |      |
| STM2716 | 1,54 | 0,02 | 1,38 | 0,07 |
| STM2717 | 0,73 | 0,05 | 0,95 | 0,09 |
| STM2718 | 1,05 | 0,03 | 0,59 | 0,01 |
| STM2719 |      |      |      |      |
| STM2720 |      |      |      |      |
| STM2721 |      |      |      |      |
| STM2722 | 1,74 | 0,02 | 1,54 | 0,06 |

|         |      |      |      |      |      |
|---------|------|------|------|------|------|
| STM2723 |      |      |      |      |      |
| STM2726 |      |      |      |      |      |
| STM2727 |      |      |      |      |      |
| STM2728 |      |      |      |      |      |
| STM2729 |      |      |      |      |      |
| STM2730 |      |      |      |      |      |
| STM2731 |      | 0,67 | 0,01 | 1,33 | 0,06 |
| STM2732 |      |      |      |      |      |
| STM2733 |      |      |      |      |      |
| STM2734 |      |      |      |      |      |
| STM2735 |      |      |      |      |      |
| STM2736 |      |      |      |      |      |
| STM2737 |      |      |      |      |      |
| STM2738 |      |      |      |      |      |
| STM2739 |      | 0,90 | 0,03 | 0,64 | 0,02 |
| STM2740 |      | 1,31 | 0,01 | 0,85 | 0,03 |
| STM2742 |      | 0,81 | 0,03 | 0,69 | 0,03 |
| STM2744 |      |      |      | 0,10 | 0,01 |
| STM2746 |      | 1,39 | 0,07 | 1,21 | 0,09 |
| STM2747 |      | 0,46 | 0,03 | 1,28 | 0,02 |
| STM2748 |      | 2,46 | 0,02 | 0,47 | 0,00 |
| STM2749 |      | 0,81 | 0,01 | 1,50 | 0,06 |
| STM2750 |      | 0,67 | 0,05 | 1,77 | 0,07 |
| STM2751 |      | 0,79 | 0,01 | 1,39 | 0,07 |
| STM2752 |      | 0,51 | 0,02 | 1,24 | 0,08 |
| STM2753 |      | 3,75 | 0,02 | 0,20 | 0,01 |
| STM2754 |      | 0,41 | 0,02 | 3,62 | 0,03 |
| STM2755 |      | 0,74 | 0,00 | 1,50 | 0,06 |
| STM2756 |      | 1,08 | 0,09 | 1,09 | 0,09 |
| STM2757 |      | 3,69 | 0,02 | 0,14 | 0,01 |
| STM2758 |      | 0,66 | 0,05 | 1,60 | 0,07 |
| STM2759 |      | 0,77 | 0,01 | 1,34 | 0,08 |
| STM2760 |      | 1,10 | 0,08 | 1,10 | 0,09 |
| STM2761 |      | 1,14 | 0,08 | 1,16 | 0,09 |
| STM2762 |      | 3,46 | 0,02 | 0,15 | 0,01 |
| STM2763 |      | 0,69 | 0,06 | 1,44 | 0,08 |
| STM2764 |      | 0,75 | 0,00 | 1,28 | 0,08 |
| STM2765 |      | 1,07 | 0,09 | 1,18 | 0,08 |
| STM2766 |      | 1,31 | 0,07 | 0,16 | 0,01 |
| STM2767 |      | 3,39 | 0,03 | 0,14 | 0,01 |
| STM2770 | fljA | 0,75 | 0,07 | 2,28 | 0,03 |
| STM2771 | fljB | 0,90 | 0,00 | 0,81 | 0,04 |
| STM2772 | hin  | 1,98 | 0,00 | 0,65 | 0,02 |
| STM2773 | iroB | 0,96 | 0,08 | 1,20 | 0,05 |
| STM2775 | iroD | 1,17 | 0,07 | 1,21 | 0,08 |
| STM2776 | iroE | 0,75 | 0,02 | 2,08 | 0,06 |

|         |        |       |      |      |      |
|---------|--------|-------|------|------|------|
| STM2777 | iroN   | 3,47  | 0,02 | 0,14 | 0,01 |
| STM2778 |        | 1,16  | 0,08 | 1,68 | 0,02 |
| STM2779 |        | 0,94  | 0,07 | 0,86 | 0,09 |
| STM2780 |        | 1,65  | 0,00 | 0,71 | 0,08 |
| STM2781 | virK   | 1,31  | 0,00 | 0,88 | 0,06 |
| STM2782 | mig-14 | 0,94  | 0,08 | 1,03 | 0,09 |
| STM2783 | nxiA   | 2,12  | 0,04 | 0,19 | 0,00 |
| STM2784 | tctE   | 0,30  | 0,01 | 1,03 | 0,10 |
| STM2785 | tctD   | 0,54  | 0,04 | 5,00 | 0,03 |
| STM2787 |        | 0,34  |      | 0,59 | 0,01 |
| STM2788 |        |       |      |      |      |
| STM2865 | avrA   | 1,06  | 0,05 | 1,04 | 0,09 |
| STM2866 | sprB   | 0,98  | 0,08 | 1,79 | 0,06 |
| STM2867 | hilC   | 0,02  | 0,00 | 1,28 | 0,08 |
| STM2868 |        | 1,14  | 0,07 | 1,14 | 0,07 |
| STM2869 | orgA   | 0,64  | 0,07 | 0,52 | 0,03 |
| STM2871 | prgK   | 2,64  | 0,03 | 0,53 | 0,01 |
| STM2872 | prgJ   | 10,67 | 0,05 | 0,19 | 0,01 |
| STM2873 | prgI   | 1,02  |      | 0,32 | 0,07 |
| STM2874 | prgH   | 1,41  | 0,02 | 0,67 | 0,02 |
| STM2875 | hilD   | 0,63  | 0,01 | 1,38 | 0,06 |
| STM2876 | hilA   | 0,09  | 0,00 | 0,26 | 0,00 |
| STM2877 | iagB   | 3,25  | 0,03 | 0,19 | 0,01 |
| STM2878 | sptP   | 1,48  | 0,05 | 0,70 | 0,04 |
| STM2879 | sicP   | 0,88  | 0,05 | 0,73 | 0,07 |
| STM2880 |        | 1,58  | 0,03 | 1,60 | 0,06 |
| STM2881 | iacP   | 0,96  | 0,08 | 1,78 | 0,02 |
| STM2882 | sipA   | 0,94  | 0,08 | 0,74 | 0,02 |
| STM2883 | sipD   | 0,78  | 0,03 | 1,12 | 0,07 |
| STM2884 | sipC   | 3,10  | 0,02 | 0,21 | 0,00 |
| STM2885 | sipB   | 0,10  |      |      |      |
| STM2886 | sicA   | 1,04  | 0,08 | 0,81 | 0,05 |
| STM2887 | spaS   | 0,87  | 0,07 | 1,63 | 0,04 |
| STM2888 | spaR   | 0,77  | 0,02 | 2,24 | 0,05 |
| STM2889 | spaQ   | 2,55  | 0,00 | 2,02 | 0,04 |
| STM2890 | spaP   | 1,15  | 0,03 | 0,64 | 0,02 |
| STM2892 | invJ   | 1,00  | 0,10 | 0,94 | 0,08 |
| STM2893 | invI   | 0,82  | 0,04 | 1,35 | 0,04 |
| STM2894 | invC   | 0,94  | 0,05 | 2,27 | 0,05 |
| STM2895 | invB   | 0,97  | 0,09 | 0,70 | 0,03 |
| STM2896 | invA   | 0,52  | 0,05 | 0,66 | 0,01 |
| STM2897 | invE   | 1,07  | 0,08 | 1,23 | 0,05 |
| STM2899 | invF   | 3,92  | 0,05 | 1,45 | 0,01 |
| STM2900 | invH   | 1,02  | 0,08 | 0,47 | 0,01 |
| STM2901 |        | 1,28  | 0,03 | 1,14 | 0,08 |
| STM2902 |        | 1,45  | 0,06 | 0,85 | 0,02 |

|         |      |      |      |      |      |
|---------|------|------|------|------|------|
| STM2903 |      | 0,48 |      | 0,41 | 0,05 |
| STM2904 |      | 0,75 | 0,06 | 0,54 | 0,04 |
| STM2905 |      | 0,65 | 0,05 | 1,05 | 0,09 |
| STM2906 |      |      |      | 7,81 |      |
| STM2907 | pphB | 0,63 | 0,04 | 1,79 | 0,07 |
| STM2908 |      | 0,66 | 0,07 | 1,38 | 0,07 |
| STM2909 | mutS |      |      | 0,25 | 0,03 |
| STM2911 |      | 1,09 | 0,08 | 1,19 | 0,08 |
| STM2912 |      | 3,50 | 0,02 | 0,13 | 0,01 |
| STM2913 |      | 0,65 | 0,05 | 2,34 | 0,05 |
| STM2914 |      | 0,34 | 0,05 | 1,15 | 0,09 |
| STM3025 |      | 0,51 | 0,03 | 0,31 | 0,02 |
| STM3026 |      | 1,61 | 0,06 | 0,82 | 0,05 |
| STM3027 | stdC | 0,62 | 0,00 | 1,05 | 0,09 |
| STM3028 | stdB | 0,92 | 0,06 | 1,07 | 0,05 |
| STM3029 | stdA | 0,69 | 0,01 | 2,61 | 0,04 |
| STM3030 |      | 1,23 | 0,08 | 0,66 | 0,05 |
| STM3031 |      | 0,63 | 0,07 | 0,27 | 0,02 |
| STM3033 |      | 1,04 | 0,08 | 0,46 | 0,01 |
| STM3034 |      | 0,91 | 0,05 | 0,52 | 0,01 |
| STM3036 |      | 0,94 | 0,07 | 1,84 | 0,06 |
| STM3079 |      | 1,12 | 0,08 | 1,20 | 0,08 |
| STM3081 |      | 0,10 | 0,00 | 0,61 | 0,07 |
| STM3082 |      | 0,39 | 0,04 | 1,56 | 0,06 |
| STM3083 |      | 1,05 | 0,09 | 1,15 | 0,06 |
| STM3084 |      | 1,02 | 0,09 | 0,68 | 0,02 |
| STM3117 |      | 1,26 | 0,08 | 0,15 | 0,01 |
| STM3118 |      | 1,57 | 0,07 | 2,41 | 0,02 |
| STM3119 |      | 0,31 | 0,01 | 1,14 | 0,08 |
| STM3120 |      | 1,23 | 0,06 | 1,19 | 0,07 |
| STM3121 |      | 0,92 | 0,07 | 0,73 | 0,02 |
| STM3122 |      | 0,64 | 0,06 | 1,46 | 0,08 |
| STM3123 |      | 0,30 | 0,00 | 1,52 | 0,06 |
| STM3124 |      | 1,03 | 0,10 | 1,42 | 0,07 |
| STM3125 |      | 0,70 | 0,05 | 0,15 | 0,01 |
| STM3126 |      | 0,64 | 0,05 | 4,81 | 0,02 |
| STM3127 |      | 0,76 | 0,00 | 1,77 | 0,05 |
| STM3128 |      | 1,54 | 0,02 | 1,59 | 0,07 |
| STM3129 |      | 1,07 | 0,09 | 2,28 | 0,00 |
| STM3130 |      | 1,10 | 0,08 | 1,12 | 0,09 |
| STM3131 |      | 0,93 | 0,06 | 2,55 | 0,05 |
| STM3132 |      | 0,41 | 0,05 | 0,36 | 0,00 |
| STM3133 |      | 1,08 | 0,09 | 1,34 | 0,07 |
| STM3134 |      | 0,42 | 0,00 | 1,08 | 0,05 |
| STM3191 |      | 0,88 | 0,04 | 2,43 | 0,05 |
| STM3192 |      | 1,01 | 0,10 | 1,49 | 0,04 |

|         |      |      |      |      |      |
|---------|------|------|------|------|------|
| STM3193 |      | 0,64 | 0,05 | 4,77 | 0,03 |
| STM3194 |      | 3,51 | 0,02 | 0,15 | 0,01 |
| STM3195 | ribB | 0,90 | 0,05 | 1,08 | 0,07 |
| STM3196 | yqiC | 0,91 | 0,06 | 0,66 | 0,01 |
| STM3197 | glgS | 1,10 | 0,05 | 1,52 | 0,07 |
| STM3198 |      | 0,93 | 0,09 | 1,34 | 0,07 |
| STM3199 | yqiK | 1,07 | 0,09 | 1,97 | 0,00 |
| STM3200 | rfaE | 1,08 | 0,05 | 0,60 | 0,01 |
| STM3202 | ygiF | 0,87 | 0,04 | 0,40 | 0,03 |
| STM3203 | ygiM | 3,67 | 0,00 | 0,91 | 0,09 |
| STM3204 | cca  | 0,58 | 0,07 | 2,18 | 0,05 |
| STM3205 | bacA | 1,33 | 0,05 | 1,11 | 0,08 |
| STM3206 | folB | 0,32 | 0,01 | 0,75 | 0,06 |
| STM3207 | ygiH | 1,22 | 0,06 | 0,29 | 0,01 |
| STM3208 | gcp  | 0,83 | 0,04 | 0,91 | 0,07 |
| STM3353 | oadG | 3,28 | 0,03 | 0,14 | 0,01 |
| STM3354 |      | 1,03 | 0,08 | 0,52 | 0,02 |
| STM3355 |      | 1,41 | 0,00 | 0,20 | 0,01 |
| STM3356 |      | 1,05 | 0,07 | 1,80 | 0,06 |
| STM3357 |      | 1,02 | 0,09 | 0,52 | 0,02 |
| STM3358 |      | 1,21 | 0,02 | 1,68 | 0,00 |
| STM3527 |      | 0,95 | 0,09 | 0,87 | 0,09 |
| STM3528 |      | 0,44 | 0,01 | 1,28 | 0,08 |
| STM3529 |      | 0,55 | 0,05 | 0,57 | 0,01 |
| STM3530 |      | 0,58 | 0,04 | 0,76 | 0,04 |
| STM3532 |      | 0,69 | 0,02 | 0,80 | 0,07 |
| STM3533 |      | 1,07 | 0,09 | 0,87 | 0,09 |
| STM3636 | lpfE | 1,05 | 0,07 | 0,38 | 0,00 |
| STM3637 | lpfD | 1,82 | 0,05 | 0,42 | 0,01 |
| STM3638 | lpfC | 0,87 | 0,03 | 2,30 | 0,05 |
| STM3639 | lpfB | 0,99 | 0,10 | 1,15 | 0,07 |
| STM3640 | lpfA | 0,79 | 0,03 | 4,12 | 0,03 |
| STM3752 |      | 0,94 | 0,09 | 1,13 | 0,09 |
| STM3753 | sugR | 0,89 | 0,03 | 0,89 | 0,03 |
| STM3755 | rhuM | 2,35 | 0,03 | 0,48 | 0,05 |
| STM3756 | rmbA | 0,98 | 0,09 | 1,23 | 0,06 |
| STM3757 | misL |      |      |      |      |
| STM3758 | fidL | 1,09 | 0,09 | 1,65 | 0,05 |
| STM3759 | marT | 1,81 | 0,06 | 0,75 | 0,07 |
| STM3761 | slsA | 0,18 | 0,00 | 5,56 | 0,02 |
| STM3762 | cigR | 1,34 | 0,02 | 0,66 | 0,00 |
| STM3763 | mgtB | 1,04 | 0,08 | 1,02 | 0,09 |
| STM3764 | mgtC | 0,77 | 0,05 | 2,81 | 0,04 |
| STM3766 |      | 0,90 | 0,08 | 6,47 | 0,00 |
| STM3767 |      | 0,71 | 0,01 | 1,66 | 0,06 |
| STM3768 |      | 0,98 | 0,10 | 1,21 | 0,08 |

|         |      |      |       |      |
|---------|------|------|-------|------|
| STM3769 | 0,57 | 0,03 | 1,49  | 0,08 |
| STM3770 | 3,38 | 0,02 | 0,13  | 0,01 |
| STM3771 |      |      |       |      |
| STM3772 | 0,27 |      | 4,21  | 0,05 |
| STM3773 | 1,54 | 0,06 | 0,91  | 0,02 |
| STM3774 | 0,86 | 0,07 | 1,34  | 0,07 |
| STM3775 | 4,39 | 0,03 | 0,38  | 0,03 |
| STM3779 | 0,72 | 0,00 | 1,48  | 0,07 |
| STM3780 | 0,92 | 0,08 | 1,44  | 0,07 |
| STM3781 | 0,65 | 0,06 | 1,31  | 0,08 |
| STM3782 | 0,85 | 0,09 | 0,70  | 0,07 |
| STM3783 | 0,16 | 0,03 | 10,40 | 0,00 |
| STM3784 | 1,92 | 0,05 | 0,30  | 0,02 |
| STM4010 | 1,02 | 0,10 | 2,60  | 0,03 |
| STM4011 | 1,24 | 0,02 | 0,69  | 0,06 |
| STM4012 | 0,11 | 0,01 | 2,03  | 0,06 |
| STM4013 | 2,65 | 0,04 | 0,13  | 0,01 |
| STM4014 | 1,19 | 0,08 | 0,61  | 0,02 |
| STM4015 | 2,28 | 0,00 | 2,87  | 0,03 |
| STM4195 | 1,84 | 0,03 | 0,22  | 0,01 |
| STM4196 | 3,55 | 0,05 | 0,67  | 0,03 |
| STM4197 | 2,23 | 0,00 | 2,22  | 0,04 |
| STM4198 | 0,91 | 0,07 | 1,39  | 0,01 |
| STM4199 | 0,75 | 0,02 | 0,79  | 0,01 |
| STM4200 | 0,77 | 0,04 | 1,00  | 0,10 |
| STM4201 | 2,12 | 0,00 | 2,76  | 0,03 |
| STM4202 | 0,96 | 0,09 | 1,14  | 0,05 |
| STM4203 | 1,41 | 0,05 | 0,74  | 0,01 |
| STM4204 | 3,64 | 0,04 | 0,40  | 0,01 |
| STM4205 | 0,96 | 0,07 | 2,06  | 0,05 |
| STM4206 | 0,75 | 0,01 | 1,70  | 0,03 |
| STM4207 | 1,14 | 0,08 | 2,54  | 0,04 |
| STM4208 | 0,95 | 0,04 | 0,46  | 0,01 |
| STM4209 | 0,78 | 0,08 | 0,31  | 0,03 |
| STM4210 | 0,80 | 0,01 | 1,58  | 0,04 |
| STM4211 | 0,70 | 0,01 | 1,69  | 0,04 |
| STM4212 | 1,04 | 0,07 | 0,45  | 0,01 |
| STM4213 | 1,00 | 0,10 | 2,55  | 0,04 |
| STM4214 | 1,05 | 0,06 | 0,89  | 0,07 |
| STM4215 | 0,84 | 0,02 | 1,71  | 0,03 |
| STM4216 | 0,92 | 0,06 | 1,03  | 0,09 |
| STM4217 | 1,08 | 0,05 | 0,55  | 0,02 |
| STM4218 | 1,10 | 0,05 | 1,64  | 0,06 |
| STM4219 | 4,39 | 0,03 | 0,50  | 0,04 |
| STM4257 | 0,73 | 0,01 | 1,50  | 0,05 |
| STM4258 | 0,83 | 0,02 | 1,13  | 0,06 |

|         |      |      |      |      |      |
|---------|------|------|------|------|------|
| STM4259 |      | 0,99 | 0,09 | 0,55 | 0,02 |
| STM4260 |      | 1,12 | 0,03 | 2,97 | 0,04 |
| STM4261 |      | 5,35 | 0,04 | 1,12 | 0,05 |
| STM4262 |      | 0,75 | 0,02 | 1,90 | 0,03 |
| STM4305 |      | 0,15 | 0,02 | 1,65 | 0,06 |
| STM4306 |      | 0,10 | 0,00 | 1,94 | 0,05 |
| STM4307 |      | 0,40 | 0,00 | 1,98 | 0,02 |
| STM4308 |      | 1,09 | 0,09 | 0,66 | 0,04 |
| STM4309 |      | 0,59 | 0,02 | 0,60 | 0,02 |
| STM4310 |      | 0,60 | 0,04 | 3,58 | 0,03 |
| STM4312 |      | 1,09 | 0,08 | 1,13 | 0,09 |
| STM4313 |      | 1,06 | 0,06 | 0,55 | 0,02 |
| STM4314 |      | 0,79 | 0,01 | 1,44 | 0,07 |
| STM4315 |      | 1,04 | 0,09 | 1,26 | 0,08 |
| STM4316 |      | 0,71 | 0,08 | 0,96 | 0,09 |
| STM4317 |      | 1,07 | 0,08 | 1,27 | 0,08 |
| STM4318 |      | 3,63 | 0,02 | 0,84 | 0,05 |
| STM4319 | phoN | 1,15 | 0,05 | 0,88 | 0,09 |
| STM4320 |      | 1,08 | 0,09 | 0,50 | 0,06 |
| STM4418 |      | 2,26 | 0,00 | 2,37 | 0,04 |
| STM4419 |      | 1,05 | 0,08 | 1,20 | 0,01 |
| STM4420 |      | 0,97 | 0,10 | 0,99 | 0,10 |
| STM4421 |      | 0,84 | 0,06 | 0,66 | 0,02 |
| STM4422 |      | 2,05 | 0,00 | 2,29 | 0,04 |
| STM4423 |      | 8,13 | 0,04 | 1,24 | 0,03 |
| STM4424 |      | 0,77 | 0,03 | 0,72 | 0,01 |
| STM4425 |      | 1,28 | 0,08 | 0,37 | 0,00 |
| STM4426 | srfJ | 2,67 | 0,00 | 2,34 | 0,04 |
| STM4427 |      | 0,52 | 0,03 | 1,20 | 0,02 |
| STM4428 |      | 2,80 | 0,01 | 0,67 | 0,01 |
| STM4429 |      | 3,80 | 0,02 | 0,14 | 0,01 |
| STM4430 |      | 0,70 | 0,03 | 0,60 | 0,02 |
| STM4431 |      | 1,06 | 0,05 | 2,22 | 0,05 |
| STM4432 |      | 0,34 | 0,00 | 1,63 | 0,04 |
| STM4433 |      | 0,70 | 0,01 | 0,30 | 0,01 |
| STM4434 |      | 1,01 | 0,09 | 0,73 | 0,05 |
| STM4435 |      | 1,14 | 0,04 | 2,15 | 0,05 |
| STM4436 |      | 0,79 | 0,01 | 1,43 | 0,04 |
| STM4440 |      | 0,86 | 0,03 | 1,17 | 0,03 |
| STM4441 |      | 0,41 | 0,00 | 0,54 | 0,02 |
| STM4442 |      | 1,01 | 0,10 | 2,76 | 0,04 |
| STM4444 |      | 0,71 | 0,02 | 2,30 | 0,00 |
| STM4445 |      | 0,68 | 0,03 | 2,19 | 0,05 |
| STM4446 |      | 0,39 | 0,04 | 2,28 | 0,04 |
| STM4447 |      | 0,57 | 0,01 | 1,54 | 0,03 |
| STM4448 |      | 1,52 | 0,05 | 0,70 | 0,05 |



|         |      |      |      |      |      |
|---------|------|------|------|------|------|
| STM4450 |      | 0,54 | 0,00 | 0,93 | 0,09 |
| STM4488 |      | 1,24 | 0,09 | 0,42 | 0,00 |
| STM4490 |      | 0,86 | 0,04 | 0,57 | 0,01 |
| STM4491 |      | 1,01 | 0,09 | 1,35 | 0,07 |
| STM4492 |      | 1,32 | 0,00 | 0,79 | 0,04 |
| STM4493 |      | 0,91 | 0,01 | 0,71 | 0,02 |
| STM4494 |      | 1,12 | 0,06 | 0,73 | 0,03 |
| STM4496 |      | 0,91 | 0,05 | 1,53 | 0,06 |
| STM4571 |      | 0,60 | 0,00 | 0,49 | 0,06 |
| STM4572 | stjB | 0,26 | 0,00 | 1,39 | 0,07 |
| STM4573 | stjC | 1,11 | 0,08 | 1,09 | 0,09 |
| STM4574 |      | 0,95 | 0,04 | 0,47 | 0,05 |
| STM4575 |      | 2,23 | 0,03 | 1,05 | 0,10 |
| STM4591 | sthE | 1,21 | 0,07 | 1,09 | 0,09 |
| STM4592 | sthD | 0,64 | 0,07 | 3,37 | 0,01 |
| STM4594 | sthA | 0,67 | 0,01 | 0,78 | 0,00 |
| STM4596 |      | 0,93 | 0,09 | 5,67 | 0,00 |

### Lipid metabolism

|         |      |             |             |             |             |
|---------|------|-------------|-------------|-------------|-------------|
| STM0049 | lytB | 1,16        | 0,02        | 0,87        | 0,07        |
| STM0055 |      | 0,99        | 0,10        | 0,98        | 0,09        |
| STM0070 | caiD | 0,80        | 0,02        | 1,56        | 0,04        |
| STM0071 | caiC | <b>0,29</b> | <b>0,00</b> | <b>0,50</b> | <b>0,05</b> |
| STM0220 | dxr  | 0,81        | 0,04        | 0,76        | 0,02        |
| STM0221 | uppS | 1,20        | 0,02        | 0,79        | 0,01        |
| STM0222 | cdsA | 1,57        | 0,00        | 0,97        | 0,06        |
| STM0227 | fabZ | 1,27        | 0,02        | 0,73        | 0,02        |
| STM0232 | accA | 1,71        | 0,01        | 1,24        | 0,07        |
| STM0309 | yafH | 1,45        | 0,08        | <b>2,44</b> | <b>0,03</b> |
| STM0371 | prpE | <b>3,86</b> | <b>0,00</b> | 0,96        | 0,10        |
| STM0376 | sbmA | 0,79        | 0,06        | 0,88        | 0,09        |
| STM0464 | tesB | 0,91        | 0,04        | 0,73        | 0,02        |
| STM0490 | aes  | <b>0,24</b> | <b>0,00</b> | 1,44        | 0,07        |
| STM0519 | glxR | <b>3,83</b> | <b>0,02</b> | <b>0,15</b> | <b>0,01</b> |
| STM0570 | apeE | 0,79        | 0,06        | <b>0,37</b> | <b>0,01</b> |
| STM0812 | ybhO | 0,88        | 0,03        | <b>8,97</b> | <b>0,02</b> |
| STM0857 |      | <b>2,96</b> | <b>0,02</b> | <b>0,13</b> | <b>0,01</b> |
| STM0865 | ybjG | 1,43        | 0,02        | 1,21        | 0,03        |
| STM1067 | fabA | 0,79        | 0,05        | 0,85        | 0,09        |
| STM1148 | ymdC | 1,54        | 0,01        | <b>0,40</b> | <b>0,01</b> |
| STM1192 | plsX | 0,62        | 0,03        | 0,83        | 0,03        |
| STM1193 | fabH | 1,22        | 0,00        | 1,21        | 0,06        |
| STM1194 | fabD | 0,87        | 0,02        | 0,83        | 0,01        |
| STM1197 | fabF | 0,77        | 0,07        | 0,89        | 0,09        |
| STM1350 | ydiD | <b>2,33</b> | <b>0,05</b> | <b>2,11</b> | <b>0,04</b> |
| STM1356 | ydiO | <b>3,60</b> | <b>0,02</b> | <b>0,16</b> | <b>0,01</b> |

|         |      |      |      |      |      |
|---------|------|------|------|------|------|
| STM1357 | ydiF | 1,09 | 0,07 | 1,32 | 0,05 |
| STM1623 |      | 0,35 | 0,05 | 0,37 | 0,05 |
| STM1631 | sseJ | 2,41 | 0,03 | 1,17 | 0,09 |
| STM1642 | acpD | 0,17 | 0,03 | 1,39 | 0,06 |
| STM1700 | fabI | 0,94 | 0,08 | 0,49 | 0,01 |
| STM1710 | pgpB | 1,05 | 0,09 | 1,16 | 0,08 |
| STM1736 | yciA | 0,68 | 0,01 | 0,92 | 0,08 |
| STM1739 | cls  | 0,11 | 0,01 | 0,86 | 0,08 |
| STM1779 | ipk  | 0,65 | 0,01 | 1,08 | 0,09 |
| STM1818 | fadD | 0,76 | 0,08 | 1,97 | 0,02 |
| STM1945 | pgsA | 3,25 | 0,03 | 0,20 | 0,02 |
| STM2140 | yegS | 1,23 | 0,02 | 0,83 | 0,05 |
| STM2213 | yeiU | 1,98 | 0,01 | 0,98 | 0,10 |
| STM2232 | oafA | 1,46 | 0,05 | 2,24 | 0,02 |
| STM2305 | menE | 0,90 | 0,06 | 1,12 | 0,09 |
| STM2366 | accD | 0,91 | 0,07 | 0,45 | 0,00 |
| STM2378 | fabB | 0,94 | 0,08 | 0,56 | 0,00 |
| STM2389 | yfcY | 0,97 | 0,08 | 2,33 | 0,05 |
| STM2391 | fadL | 1,02 | 0,09 | 0,54 | 0,02 |
| STM2523 | gcpE | 0,87 | 0,09 | 0,90 | 0,09 |
| STM2577 | acpS | 1,18 | 0,03 | 0,93 | 0,06 |
| STM2652 | pssA |      |      |      |      |
| STM2687 | yfjG | 0,97 | 0,08 | 0,61 | 0,01 |
| STM2881 | iacP | 0,96 | 0,08 | 1,78 | 0,02 |
| STM2918 | ygbJ | 3,78 | 0,02 | 0,14 | 0,01 |
| STM2929 | ispF | 1,18 | 0,08 | 0,75 | 0,07 |
| STM2930 | ispD | 1,01 | 0,10 | 0,63 | 0,00 |
| STM3010 | aas  | 1,47 | 0,01 | 1,40 | 0,02 |
| STM3019 | yqeF | 1,99 | 0,04 | 2,04 | 0,04 |
| STM3039 | idi  | 1,02 | 0,10 | 1,11 | 0,09 |
| STM3119 |      | 0,31 | 0,01 | 1,14 | 0,08 |
| STM3173 | plsC | 0,38 | 0,04 | 1,01 | 0,10 |
| STM3248 | garR | 2,08 | 0,03 | 0,21 | 0,00 |
| STM3273 | yhbT | 1,01 | 0,10 | 0,65 | 0,02 |
| STM3379 | accB | 0,97 | 0,09 | 0,48 | 0,01 |
| STM3380 | accC | 0,84 | 0,04 | 0,60 | 0,00 |
| STM3595 |      | 0,95 | 0,07 | 0,83 | 0,02 |
| STM3961 | pldB | 0,61 | 0,00 | 0,93 | 0,06 |
| STM3982 | fadA | 0,51 | 0,03 | 1,13 | 0,09 |
| STM3983 | fadB | 0,78 | 0,08 | 1,13 | 0,09 |
| STM3998 | yihG | 0,32 | 0,00 | 2,32 | 0,01 |
| STM4023 | yihU | 0,98 | 0,09 | 1,13 | 0,07 |
| STM4032 |      | 1,18 | 0,08 | 0,80 | 0,08 |
| STM4064 | ushB | 0,89 | 0,02 | 0,77 | 0,04 |
| STM4235 | plsB | 1,10 | 0,08 | 0,73 | 0,03 |
| STM4319 | phoN | 1,15 | 0,05 | 0,88 | 0,09 |

|         |     |      |      |      |      |
|---------|-----|------|------|------|------|
| STM4348 | psd | 0,70 | 0,06 | 1,04 | 0,10 |
|---------|-----|------|------|------|------|

### Nucleotide transport and metabolism

|         |      |             |             |             |             |
|---------|------|-------------|-------------|-------------|-------------|
| STM0033 |      | 2,15        | 0,06        | 1,52        | 0,01        |
| STM0051 | rihC | 0,98        | 0,09        | 1,61        | 0,07        |
| STM0141 | guaC | 1,00        | 0,10        | <b>0,45</b> | <b>0,00</b> |
| STM0170 | hpt  | <b>0,35</b> | <b>0,02</b> | 1,59        | 0,05        |
| STM0207 | pfs  | <b>0,48</b> | <b>0,04</b> | 1,31        | 0,05        |
| STM0208 | dgt  | 1,07        | 0,06        | 0,65        | 0,01        |
| STM0218 | pyrH | 1,57        | 0,02        | 1,22        | 0,08        |
| STM0317 | gpt  | 0,78        | 0,03        | 1,32        | 0,08        |
| STM0483 | apt  | 1,15        | 0,08        | 0,94        | 0,10        |
| STM0488 | adk  | 0,92        | 0,09        | 0,71        | 0,07        |
| STM0515 | allA | 0,97        | 0,09        | <b>2,25</b> | <b>0,00</b> |
| STM0522 | allP | <b>2,14</b> | <b>0,00</b> | <b>2,42</b> | <b>0,04</b> |
| STM0523 | allB | 0,77        | 0,02        | 0,78        | 0,02        |
| STM0524 | ybbY | 0,91        | 0,06        | 0,64        | 0,02        |
| STM0533 | purK | <b>0,14</b> | <b>0,03</b> | <b>0,32</b> | <b>0,04</b> |
| STM0533 | purK |             |             |             |             |
| STM0534 | purE | 0,97        | 0,09        | 1,10        | 0,04        |
| STM0534 | purE |             |             |             |             |
| STM0661 | ybeK | 1,07        | 0,07        | 0,64        | 0,01        |
| STM0980 | cmk  | 1,20        | 0,03        | 0,57        | 0,02        |
| STM1058 | pyrD | 0,99        | 0,10        | <b>0,27</b> | <b>0,04</b> |
| STM1200 | tmk  | <b>0,15</b> | <b>0,00</b> | <b>0,39</b> | <b>0,02</b> |
| STM1232 | purB | <b>0,28</b> | <b>0,03</b> | <b>0,20</b> | <b>0,01</b> |
| STM1330 |      | 1,00        | 0,10        | <b>2,78</b> | <b>0,04</b> |
| STM1463 | add  | 1,05        | 0,09        | 0,99        | 0,10        |
| STM1707 | pyrF | 0,97        | 0,07        | 0,81        | 0,03        |
| STM1750 | tdk  | 0,91        | 0,07        | 1,46        | 0,06        |
| STM1756 | purU | 0,91        | 0,04        | 0,57        | 0,01        |
| STM1780 | prsA | 0,89        | 0,05        | 0,59        | 0,00        |
| STM1883 | purT | 0,63        | 0,05        | 1,67        | 0,07        |
| STM2121 | dcd  | <b>3,75</b> | <b>0,03</b> | <b>0,21</b> | <b>0,01</b> |
| STM2122 | udk  | 1,61        | 0,06        | 1,17        | 0,09        |
| STM2183 | cdd  | 1,20        | 0,03        | 0,72        | 0,02        |
| STM2187 | yeiA | 0,64        | 0,00        | 0,78        | 0,02        |
| STM2277 | nrdA | 1,31        | 0,05        | 1,43        | 0,06        |
| STM2278 | nrdB | 1,27        | 0,01        | 0,97        | 0,09        |
| STM2362 | purF | 0,84        | 0,02        | 0,69        | 0,01        |
| STM2409 | nupC | 1,26        | 0,03        | <b>0,43</b> | <b>0,02</b> |
| STM2422 | xapA | 1,11        | 0,04        | 0,63        | 0,02        |
| STM2437 | yfeJ | 0,85        | 0,07        | 0,60        | 0,03        |
| STM2487 | purC | 0,59        | 0,04        | 1,91        | 0,01        |
| STM2497 | uraA | <b>2,00</b> | <b>0,04</b> | <b>3,49</b> | <b>0,02</b> |
| STM2498 | upp  | 1,07        | 0,03        | 0,77        | 0,03        |

|         |      |             |             |              |             |
|---------|------|-------------|-------------|--------------|-------------|
| STM2499 | purM | 0,79        | 0,08        | 0,56         | 0,06        |
| STM2500 | purN | 1,77        | 0,05        | <b>0,26</b>  | <b>0,00</b> |
| STM2502 | ppx  | 0,94        | 0,07        | 0,51         | 0,00        |
| STM2510 | guaA | 1,03        | 0,10        | 0,51         | 0,04        |
| STM2526 | ndk  | 0,57        | 0,05        | 1,48         | 0,06        |
| STM2565 | purG | 3,17        |             | <b>0,20</b>  | <b>0,01</b> |
| STM2568 | yfhC | 1,00        | 0,08        | 1,02         | 0,09        |
| STM2806 | nrdI | 0,68        | 0,06        | 1,56         | 0,02        |
| STM2808 | nrdF | 1,90        | 0,05        | 0,55         | 0,05        |
| STM2953 | pyrG | 0,83        | 0,03        | 0,55         | 0,01        |
| STM3001 | thyA | 1,04        | 0,07        | 0,69         | 0,01        |
| STM3103 | yggV | 1,49        | 0,02        | 1,33         | 0,01        |
| STM3167 |      | <b>2,14</b> | <b>0,03</b> | 1,59         | 0,03        |
| STM3333 |      | 0,66        | 0,07        | <b>2,77</b>  | <b>0,03</b> |
| STM3334 |      | 0,84        | 0,03        | 1,29         | 0,00        |
| STM3631 |      | 1,11        | 0,06        | <b>4,75</b>  | <b>0,01</b> |
| STM3731 | dut  | 1,36        | 0,01        | 1,02         | 0,09        |
| STM3733 | pyrE | 0,94        | 0,06        | <b>34,81</b> | <b>0,00</b> |
| STM3740 | gmk  | 1,33        | 0,02        | 0,72         | 0,03        |
| STM3747 | yicE | 0,55        | 0,08        | <b>12,85</b> | <b>0,01</b> |
| STM3939 | cyaA | 0,93        | 0,07        | 0,68         | 0,02        |
| STM3968 | udp  | 0,66        | 0,04        | 0,82         | 0,06        |
| STM4104 |      | <b>0,37</b> | <b>0,04</b> | 0,77         | 0,06        |
| STM4160 | thiG | 1,77        | 0,01        | 0,76         | 0,02        |
| STM4175 | purD | <b>2,19</b> | <b>0,02</b> | <b>10,22</b> | <b>0,00</b> |
| STM4176 | purH | 0,53        | 0,06        | 0,89         | 0,09        |
| STM4366 | purA | 1,05        | 0,08        | 0,69         | 0,02        |
| STM4403 | cpdB | 1,06        | 0,08        | 0,86         | 0,06        |
| STM4452 | nrdD | <b>3,47</b> | <b>0,03</b> | <b>0,11</b>  | <b>0,01</b> |
| STM4459 | pyrI | 0,76        | 0,01        | <b>2,53</b>  | <b>0,04</b> |
| STM4460 | pyrB | 1,13        | 0,05        | <b>2,12</b>  | <b>0,01</b> |
| STM4471 | miaE | 0,99        | 0,08        | 1,03         | 0,09        |
| STM4567 | deoC | 0,62        | 0,08        | <b>0,35</b>  | <b>0,01</b> |
| STM4568 | deoA | <b>0,41</b> | <b>0,03</b> | <b>0,27</b>  | <b>0,00</b> |
| STM4570 | deoD | 0,89        | 0,01        | 0,74         | 0,02        |

### Pseudogenes

|         |      |      |      |             |             |
|---------|------|------|------|-------------|-------------|
| PSLT021 |      |      |      |             |             |
| PSLT022 |      |      |      |             |             |
| PSLT058 |      |      |      |             |             |
| PSLT065 |      |      |      |             |             |
| PSLT071 |      |      |      |             |             |
| PSLT109 |      |      |      |             |             |
| STM0241 | cutF |      |      |             |             |
| STM0314 |      | 0,72 | 0,06 | <b>3,27</b> | <b>0,00</b> |
| STM0326 |      | 1,22 | 0,08 | <b>0,48</b> | <b>0,04</b> |

|         |       |      |      |      |      |
|---------|-------|------|------|------|------|
| STM0555 |       | 0,34 | 0,01 | 0,26 | 0,02 |
| STM0560 |       | 0,76 | 0,02 | 1,63 | 0,04 |
| STM0767 | dcoA  |      |      |      |      |
| STM0790 | hutU  |      |      |      |      |
| STM1052 |       | 1,06 | 0,10 | 1,55 | 0,05 |
| STM1120 | ycdF  |      |      |      |      |
| STM1186 |       | 3,43 | 0,03 | 0,14 | 0,01 |
| STM1464 | malY  |      |      |      |      |
| STM1465 | malX  |      |      |      |      |
| STM1474 |       | 0,84 | 0,03 | 0,82 | 0,08 |
| STM1553 |       | 0,92 | 0,08 | 0,71 | 0,03 |
| STM1666 |       | 0,44 | 0,05 | 0,69 | 0,03 |
| STM1866 |       | 0,83 | 0,04 | 0,79 | 0,08 |
| STM1930 |       | 2,15 | 0,01 | 2,28 | 0,05 |
| STM2003 |       | 0,89 | 0,06 | 0,64 | 0,02 |
| STM2664 |       | 0,56 | 0,01 | 0,51 | 0,03 |
| STM2778 |       | 1,16 | 0,08 | 1,68 | 0,02 |
| STM2975 | fucP  |      |      |      |      |
| STM3302 | yhbE  |      |      |      |      |
| STM3460 |       | 0,29 | 0,02 | 1,35 | 0,08 |
| STM3530 |       | 0,58 | 0,04 | 0,76 | 0,04 |
| STM3654 |       | 1,58 | 0,06 | 1,45 | 0,06 |
| STM3806 |       | 0,45 | 0,03 | 1,03 | 0,09 |
| STM3844 |       | 1,15 | 0,09 | 0,29 | 0,01 |
| STM3945 |       | 0,68 | 0,05 | 2,09 | 0,06 |
| STM4111 |       | 0,44 |      | 0,47 | 0,01 |
| STM4140 |       |      |      |      |      |
| STM4454 | treB  |      |      |      |      |
| pSLT    |       |      |      |      |      |
| PSLT001 |       |      |      |      |      |
| PSLT003 | repC  |      |      |      |      |
| PSLT004 | repA3 |      |      |      |      |
| PSLT005 | tap   |      |      |      |      |
| PSLT006 | repA  |      |      |      |      |
| PSLT008 | srgC  |      |      |      |      |
| PSLT009 | rsK   |      |      |      |      |
| PSLT011 | srgA  |      |      |      |      |
| PSLT012 | orf7  |      |      |      |      |
| PSLT013 | pefI  |      |      |      |      |
| PSLT014 | orf6  |      |      |      |      |
| PSLT015 | orf5  |      |      |      |      |
| PSLT016 | pefD  |      |      |      |      |
| PSLT017 | pefC  |      |      |      |      |
| PSLT018 | pefA  |      |      |      |      |
| PSLT019 | pefB  |      |      |      |      |
| PSLT021 |       |      |      |      |      |

|         |       |
|---------|-------|
| PSLT022 |       |
| PSLT023 | repA2 |
| PSLT024 |       |
| PSLT025 |       |
| PSLT026 |       |
| PSLT027 | ccdA  |
| PSLT028 | ccdB  |
| PSLT029 |       |
| PSLT030 |       |
| PSLT031 | rsdB  |
| PSLT032 |       |
| PSLT034 |       |
| PSLT035 |       |
| PSLT036 |       |
| PSLT037 | spvD  |
| PSLT038 | spvC  |
| PSLT039 | spvB  |
| PSLT040 | spvA  |
| PSLT041 | spvR  |
| PSLT042 |       |
| PSLT043 |       |
| PSLT044 |       |
| PSLT045 | rlgA  |
| PSLT046 |       |
| PSLT047 |       |
| PSLT048 | tlpA  |
| PSLT049 |       |
| PSLT050 |       |
| PSLT051 |       |
| PSLT052 | parA  |
| PSLT053 | parB  |
| PSLT054 | samB  |
| PSLT055 | samA  |
| PSLT056 |       |
| PSLT057 |       |
| PSLT058 |       |
| PSLT059 |       |
| PSLT060 |       |
| PSLT061 |       |
| PSLT062 |       |
| PSLT063 |       |
| PSLT065 |       |
| PSLT066 | ssbB  |
| PSLT067 |       |
| PSLT068 |       |
| PSLT069 | psiB  |

|         |      |
|---------|------|
| PSLT070 | psiA |
| PSLT071 |      |
| PSLT072 |      |
| PSLT073 | traM |
| PSLT074 | finP |
| PSLT076 | traY |
| PSLT077 | traA |
| PSLT078 | traL |
| PSLT079 | traE |
| PSLT080 | traK |
| PSLT081 | traB |
| PSLT082 | traP |
| PSLT083 | trbD |
| PSLT084 | traV |
| PSLT085 | traR |
| PSLT087 |      |
| PSLT088 | traC |
| PSLT089 | trbI |
| PSLT091 | traW |
| PSLT092 | traU |
| PSLT093 |      |
| PSLT094 | trbC |
| PSLT095 | traN |
| PSLT096 | trbE |
| PSLT097 | traF |
| PSLT098 | traQ |
| PSLT099 | trbB |
| PSLT100 | traH |
| PSLT101 | traG |
| PSLT102 | traS |
| PSLT103 | traT |
| PSLT104 | traD |
| PSLT105 | trbH |
| PSLT106 |      |
| PSLT107 |      |
| PSLT109 |      |
| PSLT110 | traX |
| PSLT111 | finO |

| Signal transduction |      |      |      |      |      |
|---------------------|------|------|------|------|------|
| STM2876             | hilA | 0,09 | 0,00 | 0,26 | 0,00 |
| SPI1 to SPI5        |      |      |      |      |      |
| STM0053             |      | 1,67 | 0,01 | 1,54 | 0,05 |
| STM0186             | dksA | 1,11 | 0,08 | 1,02 | 0,10 |
| STM0343             |      | 2,12 | 0,03 | 1,17 | 0,08 |
| STM0367             | prpR | 1,12 | 0,07 | 1,26 | 0,04 |

|         |        |      |      |      |      |
|---------|--------|------|------|------|------|
| STM0385 | yaiC   | 1,29 | 0,00 | 0,44 | 0,04 |
| STM0397 | phoB   | 2,91 | 0,03 | 0,14 | 0,01 |
| STM0398 | phoR   | 0,65 | 0,05 | 0,41 | 0,01 |
| STM0446 | bolA   | 0,95 | 0,03 | 0,57 | 0,01 |
| STM0468 | ylaB   | 2,93 | 0,02 | 2,59 | 0,03 |
| STM0549 | fimZ   | 0,79 | 0,07 | 0,96 | 0,09 |
| STM0561 |        | 1,04 | 0,07 | 1,00 | 0,10 |
| STM0600 | cstA   | 0,93 | 0,06 | 0,88 | 0,01 |
| STM0614 | ybdQ   | 0,90 | 0,01 | 0,79 | 0,06 |
| STM0625 | dpiB   | 1,35 | 0,05 | 0,65 | 0,02 |
| STM0669 | phoL   | 1,14 | 0,02 | 0,83 | 0,06 |
| STM0702 | kdpE   | 4,09 | 0,02 | 0,23 | 0,02 |
| STM0703 | kdpD   | 0,68 | 0,06 | 1,25 | 0,09 |
| STM0825 | ybil   | 0,23 | 0,01 | 0,80 | 0,05 |
| STM1087 | pipA   | 0,74 | 0,03 | 0,71 | 0,06 |
| STM1088 | pipB   | 6,91 | 0,00 | 0,66 | 0,03 |
| STM1089 |        | 1,05 | 0,08 | 1,71 | 0,02 |
| STM1090 | pipC   | 1,25 | 0,06 | 1,29 | 0,08 |
| STM1091 | sopB   | 0,63 | 0,04 | 0,50 | 0,00 |
| STM1092 | orfX   | 0,52 | 0,03 | 0,40 | 0,06 |
| STM1093 |        |      |      |      |      |
| STM1094 | pipD   | 1,02 | 0,09 | 0,56 | 0,03 |
| STM1095 | copS   | 0,17 | 0,00 | 6,26 | 0,02 |
| STM1096 | copR   | 0,60 | 0,06 | 1,18 | 0,09 |
| STM1126 | phoH   | 2,64 | 0,02 | 0,12 | 0,00 |
| STM1230 | phoQ   | 3,45 | 0,04 | 4,95 | 0,02 |
| STM1231 | phoP   | 3,89 | 0,00 | 1,37 | 0,06 |
| STM1283 | yeaJ   | 0,71 | 0,05 | 3,08 | 0,01 |
| STM1285 | yeaG   | 1,27 | 0,03 | 0,45 | 0,00 |
| STM1344 | ydiV   | 1,09 | 0,05 | 1,08 | 0,07 |
| STM1379 | orf48  | 1,23 | 0,02 | 1,04 | 0,10 |
| STM1380 | orf32  | 1,17 | 0,05 | 2,12 | 0,05 |
| STM1381 | orf245 | 1,08 | 0,09 | 1,16 | 0,09 |
| STM1382 | orf408 | 0,94 | 0,08 | 1,61 | 0,00 |
| STM1383 | ttrA   | 1,51 | 0,02 | 1,04 | 0,07 |
| STM1384 | ttrC   | 0,86 | 0,03 | 2,67 | 0,05 |
| STM1386 | ttrS   | 0,28 | 0,04 | 0,86 | 0,08 |
| STM1386 | ttrS   | 0,28 | 0,04 | 0,86 | 0,08 |
| STM1387 | ttrR   | 3,25 | 0,03 | 1,98 | 0,05 |
| STM1387 | ttrR   | 3,25 | 0,03 | 1,98 | 0,05 |
| STM1388 | orf70  | 0,39 | 0,03 | 0,50 | 0,01 |
| STM1389 | orf319 | 1,29 | 0,07 | 0,64 | 0,01 |
| STM1390 | orf242 | 0,84 | 0,04 | 0,41 | 0,02 |
| STM1391 | ssrB   | 0,99 | 0,09 | 0,59 | 0,02 |
| STM1391 | ssrB   | 0,99 | 0,09 | 0,59 | 0,02 |
| STM1392 | ssrA   | 0,70 | 0,04 | 0,65 | 0,03 |



|         |      |             |             |              |             |
|---------|------|-------------|-------------|--------------|-------------|
| STM1392 | ssrA | 0,70        | 0,04        | 0,65         | 0,03        |
| STM1393 | ssaB | 1,09        | 0,09        | <b>0,15</b>  | <b>0,01</b> |
| STM1394 | ssaC | 1,31        | 0,06        | 1,90         | 0,06        |
| STM1396 | ssaE | 1,01        | 0,10        | 0,95         | 0,08        |
| STM1397 | sseA | 0,85        | 0,06        | 0,88         | 0,09        |
| STM1398 | sseB | 1,31        | 0,06        | 0,94         | 0,09        |
| STM1399 | sscA | <b>3,40</b> | <b>0,02</b> | <b>0,22</b>  | <b>0,02</b> |
| STM1400 | sseC | 1,30        | 0,03        | 0,84         | 0,09        |
| STM1401 | sseD | 1,50        | 0,01        | 0,74         | 0,04        |
| STM1402 | sseE | 1,11        | 0,06        | 0,55         | 0,02        |
| STM1403 | sscB | 0,84        | 0,05        | <b>6,97</b>  | <b>0,00</b> |
| STM1404 | sseF | 0,66        | 0,03        | 1,89         | 0,06        |
| STM1405 | sseG | <b>0,27</b> | <b>0,01</b> | 0,77         | 0,08        |
| STM1406 | ssaG | <b>3,55</b> | <b>0,02</b> | <b>0,13</b>  | <b>0,02</b> |
| STM1407 | ssaH | 0,91        | 0,09        | 0,78         | 0,09        |
| STM1408 | ssal | 1,03        | 0,09        | 0,95         | 0,10        |
| STM1409 | ssaJ | <b>1,51</b> | <b>0,04</b> | 0,71         | 0,08        |
| STM1411 | ssaK | <b>0,23</b> | <b>0,04</b> | <b>0,49</b>  | <b>0,03</b> |
| STM1412 | ssaL | 1,54        | 0,01        | 0,52         | 0,05        |
| STM1413 | ssaM | <b>0,20</b> | <b>0,01</b> | 0,20         |             |
| STM1414 | ssaV | <b>0,32</b> | <b>0,04</b> | <b>0,28</b>  | <b>0,00</b> |
| STM1415 | ssaN | 0,51        | 0,00        | 0,55         | 0,02        |
| STM1416 | ssaO | 1,04        | 0,08        | 0,47         | 0,06        |
| STM1417 | ssaP | <b>2,29</b> | <b>0,05</b> | <b>3,99</b>  | <b>0,02</b> |
| STM1419 | ssaR | 1,05        | 0,09        | <b>0,50</b>  | <b>0,03</b> |
| STM1420 | ssaS | 1,70        | 0,06        | <b>0,28</b>  | <b>0,00</b> |
| STM1421 | ssaT | 0,59        | 0,07        | <b>0,36</b>  | <b>0,01</b> |
| STM1422 | ssaU | <b>0,35</b> | <b>0,00</b> | <b>4,29</b>  | <b>0,02</b> |
| STM1471 | rstB | 1,09        | 0,09        | 1,50         | 0,05        |
| STM1475 | rstA | <b>1,53</b> | <b>0,02</b> | 1,14         | 0,09        |
| STM1652 | ynaF | 0,86        | 0,06        | 0,87         | 0,09        |
| STM1660 | fnr  | 0,99        | 0,10        | <b>0,39</b>  | <b>0,03</b> |
| STM1661 | ydaA | <b>0,34</b> | <b>0,03</b> | 0,77         | 0,08        |
| STM1691 | pspF |             |             |              |             |
| STM1697 |      | <b>0,48</b> | <b>0,02</b> | 1,33         | 0,07        |
| STM1703 | yciR | <b>1,82</b> | <b>0,05</b> | 0,90         | 0,07        |
| STM1753 | hnr  | 0,74        | 0,03        | 0,77         | 0,04        |
| STM1766 | narX | 0,59        | 0,04        | 1,12         | 0,07        |
| STM1767 | narL | 1,26        | 0,02        | <b>0,44</b>  | <b>0,01</b> |
| STM1827 |      | 0,73        | 0,08        | 0,81         | 0,05        |
| STM1846 | proQ | 1,10        | 0,07        | 0,91         | 0,09        |
| STM1847 | yebR | 1,11        | 0,05        | 0,77         | 0,04        |
| STM1853 | prpA | 0,69        | 0,06        | 1,99         | 0,05        |
| STM1916 | cheY | 1,57        | 0,07        | <b>10,57</b> | <b>0,00</b> |
| STM1927 | yecG | <b>4,24</b> | <b>0,02</b> | <b>0,13</b>  | <b>0,00</b> |
| STM1947 | uvrY | 0,88        | 0,09        | 1,18         | 0,09        |

|         |      |              |             |              |             |
|---------|------|--------------|-------------|--------------|-------------|
| STM1987 |      | 1,29         | 0,04        | 0,88         | 0,09        |
| STM2117 | wzb  | 1,11         | 0,08        | <b>4,78</b>  | <b>0,00</b> |
| STM2130 | baeS | 0,87         | 0,02        | 1,10         | 0,08        |
| STM2131 | baeR | 1,37         | 0,01        | <b>0,43</b>  | <b>0,00</b> |
| STM2159 | yehU | 1,25         | 0,02        | 1,39         | 0,07        |
| STM2215 | rtn  | 1,13         | 0,09        | 0,86         | 0,09        |
| STM2246 | narP | 0,87         | 0,03        | 0,75         | 0,03        |
| STM2269 | yojN | 1,15         | 0,01        | 1,16         | 0,06        |
| STM2270 | rcsB | <b>3,75</b>  | <b>0,02</b> | <b>0,12</b>  | <b>0,01</b> |
| STM2271 | rcsC | 1,12         | 0,08        | 1,21         | 0,07        |
| STM2314 |      | <b>2,19</b>  | <b>0,01</b> | 0,96         | 0,09        |
| STM2387 | sixA | 1,44         | 0,03        | 1,17         | 0,08        |
| STM2396 | pgtA | <b>0,29</b>  | <b>0,00</b> | 0,56         | 0,01        |
| STM2397 | pgtB | 0,94         | 0,10        | <b>6,64</b>  | <b>0,00</b> |
| STM2410 | yfeA | 0,93         | 0,06        | <b>2,47</b>  | <b>0,05</b> |
| STM2480 | narQ | 0,53         | 0,05        | 1,87         | 0,04        |
| STM2503 |      | 0,70         | 0,06        | 0,88         | 0,08        |
| STM2562 | yfhA | 0,90         | 0,04        | 0,68         | 0,00        |
| STM2564 | yfhK | 1,24         | 0,03        | 1,98         | 0,03        |
| STM2637 | rseC | <b>0,40</b>  | <b>0,00</b> | <b>19,60</b> | <b>0,00</b> |
| STM2638 | rseB | <b>1,70</b>  | <b>0,00</b> | 0,73         | 0,04        |
| STM2639 | rseA | 1,42         | 0,00        | 1,71         | 0,07        |
| STM2672 | yfiN | 0,93         | 0,04        | 1,29         | 0,03        |
| STM2731 |      | 0,67         | 0,01        | 1,33         | 0,06        |
| STM2784 | tctE | <b>0,30</b>  | <b>0,01</b> | 1,03         | 0,10        |
| STM2785 | tctD | 0,54         | 0,04        | <b>5,00</b>  | <b>0,03</b> |
| STM2817 | luxS | 1,05         | 0,08        | 0,51         | 0,01        |
| STM2826 | csrA | 0,88         | 0,01        | 0,73         | 0,07        |
| STM2865 | avrA | 1,06         | 0,05        | 1,04         | 0,09        |
| STM2866 | sprB | 0,98         | 0,08        | 1,79         | 0,06        |
| STM2867 | hilC | <b>0,02</b>  | <b>0,00</b> | 1,28         | 0,08        |
| STM2868 |      | 1,14         | 0,07        | 1,14         | 0,07        |
| STM2869 | orgA | 0,64         | 0,07        | 0,52         | 0,03        |
| STM2871 | prgK | 2,64         | <b>0,03</b> | 0,53         | 0,01        |
| STM2872 | prgJ | <b>10,67</b> | <b>0,05</b> | <b>0,19</b>  | <b>0,01</b> |
| STM2873 | prgI | 1,02         |             | 0,32         | 0,07        |
| STM2874 | prgH | 1,41         | 0,02        | 0,67         | 0,02        |
| STM2875 | hilD | 0,63         | 0,01        | 1,38         | 0,06        |
| STM2877 | iagB | <b>3,25</b>  | <b>0,03</b> | <b>0,19</b>  | <b>0,01</b> |
| STM2878 | sptP | 1,48         | 0,05        | 0,70         | 0,04        |
| STM2879 | sicP | 0,88         | 0,05        | 0,73         | 0,07        |
| STM2880 |      | <b>1,58</b>  | <b>0,03</b> | 1,60         | 0,06        |
| STM2881 | iacP | 0,96         | 0,08        | 1,78         | 0,02        |
| STM2882 | sipA | 0,94         | 0,08        | 0,74         | 0,02        |
| STM2883 | sipD | 0,78         | 0,03        | 1,12         | 0,07        |
| STM2884 | sipC | <b>3,10</b>  | <b>0,02</b> | <b>0,21</b>  | <b>0,00</b> |

|         |      |             |             |             |             |
|---------|------|-------------|-------------|-------------|-------------|
| STM2885 | sipB | 0,10        |             |             |             |
| STM2886 | sicA | 1,04        | 0,08        | 0,81        | 0,05        |
| STM2887 | spaS | 0,87        | 0,07        | 1,63        | 0,04        |
| STM2888 | spaR | 0,77        | 0,02        | <b>2,24</b> | <b>0,05</b> |
| STM2889 | spaQ | <b>2,55</b> | <b>0,00</b> | <b>2,02</b> | <b>0,04</b> |
| STM2890 | spaP | 1,15        | 0,03        | 0,64        | 0,02        |
| STM2892 | invJ | 1,00        | 0,10        | 0,94        | 0,08        |
| STM2893 | invI | 0,82        | 0,04        | 1,35        | 0,04        |
| STM2894 | invC | 0,94        | 0,05        | <b>2,27</b> | <b>0,05</b> |
| STM2895 | invB | 0,97        | 0,09        | 0,70        | 0,03        |
| STM2896 | invA | 0,52        | 0,05        | 0,66        | 0,01        |
| STM2897 | invE | 1,07        | 0,08        | 1,23        | 0,05        |
| STM2899 | invF | <b>3,92</b> | <b>0,05</b> | 1,45        | 0,01        |
| STM2900 | invH | 1,02        | 0,08        | <b>0,47</b> | <b>0,01</b> |
| STM2901 |      | 1,28        | 0,03        | 1,14        | 0,08        |
| STM2902 |      | 1,45        | 0,06        | 0,85        | 0,02        |
| STM2903 |      | 0,48        |             | <b>0,41</b> | <b>0,05</b> |
| STM2904 |      | 0,75        | 0,06        | 0,54        | 0,04        |
| STM2905 |      | 0,65        | 0,05        | 1,05        | 0,09        |
| STM2906 |      |             |             | 7,81        |             |
| STM2907 | pphB | 0,63        | 0,04        | 1,79        | 0,07        |
| STM2907 | pphB | 0,63        | 0,04        | 1,79        | 0,07        |
| STM2908 |      | 0,66        | 0,07        | 1,38        | 0,07        |
| STM2909 | mutS |             |             | <b>0,25</b> | <b>0,03</b> |
| STM2911 |      | 1,09        | 0,08        | 1,19        | 0,08        |
| STM2912 |      | <b>3,50</b> | <b>0,02</b> | <b>0,13</b> | <b>0,01</b> |
| STM2913 |      | 0,65        | 0,05        | <b>2,34</b> | <b>0,05</b> |
| STM2914 |      | <b>0,34</b> | <b>0,05</b> | 1,15        | 0,09        |
| STM2956 | relA | <b>1,62</b> | <b>0,02</b> | 1,26        | 0,08        |
| STM2958 | barA | 0,79        | 0,02        | 0,99        | 0,09        |
| STM3003 | ptsP | 0,95        | 0,07        | 0,67        | 0,02        |
| STM3177 | ygiX |             |             |             |             |
| STM3178 | ygiY |             |             |             |             |
| STM3203 | ygiM | <b>3,67</b> | <b>0,00</b> | 0,91        | 0,09        |
| STM3217 | aer  | 0,79        | 0,03        | 0,52        | 0,00        |
| STM3328 | arcB | <b>3,29</b> | <b>0,04</b> | <b>0,30</b> | <b>0,01</b> |
| STM3375 | yhdA | 1,25        | 0,03        | 1,13        | 0,05        |
| STM3388 |      | 0,99        | 0,09        | 0,82        | 0,05        |
| STM3466 | crp  | 1,16        | 0,08        | 1,02        | 0,09        |
| STM3501 | envZ | 1,98        |             | 7,95        |             |
| STM3502 | ompR | 0,65        | 0,04        | 0,99        | 0,10        |
| STM3522 | rtcR | 0,64        | 0,05        | <b>0,19</b> | <b>0,00</b> |
| STM3591 | uspA | 1,48        | 0,06        | 0,71        | 0,07        |
| STM3606 | yhjB | 0,64        | 0,01        | 1,08        | 0,07        |
| STM3611 | yhjH | 1,02        | 0,10        | 1,52        | 0,07        |
| STM3615 | yhjK | 0,99        | 0,08        | 1,61        | 0,03        |

|         |      |             |             |              |             |
|---------|------|-------------|-------------|--------------|-------------|
| STM3742 | spoT | 0,58        | 0,04        | 1,30         | 0,02        |
| STM3752 |      | 0,94        | 0,09        | 1,13         | 0,09        |
| STM3753 | sugR | 0,89        | 0,03        | 0,89         | 0,03        |
| STM3755 | rhuM | <b>2,35</b> | <b>0,03</b> | <b>0,48</b>  | <b>0,05</b> |
| STM3756 | rmbA | 0,98        | 0,09        | 1,23         | 0,06        |
| STM3757 | misL |             |             |              |             |
| STM3758 | fidL | 1,09        | 0,09        | 1,65         | 0,05        |
| STM3759 | marT | 1,81        | 0,06        | 0,75         | 0,07        |
| STM3761 | slsA | <b>0,18</b> | <b>0,00</b> | <b>5,56</b>  | <b>0,02</b> |
| STM3762 | cigR | 1,34        | 0,02        | 0,66         | 0,00        |
| STM3763 | mgtB | 1,04        | 0,08        | 1,02         | 0,09        |
| STM3764 | mgtC | 0,77        | 0,05        | <b>2,81</b>  | <b>0,04</b> |
| STM3766 |      | 0,90        | 0,08        | <b>6,47</b>  | <b>0,00</b> |
| STM3767 |      | 0,71        | 0,01        | 1,66         | 0,06        |
| STM3768 |      | 0,98        | 0,10        | 1,21         | 0,08        |
| STM3769 |      | 0,57        | 0,03        | 1,49         | 0,08        |
| STM3770 |      | <b>3,38</b> | <b>0,02</b> | <b>0,13</b>  | <b>0,01</b> |
| STM3771 |      |             |             |              |             |
| STM3772 |      | 0,27        |             | <b>4,21</b>  | <b>0,05</b> |
| STM3773 |      | 1,54        | 0,06        | 0,91         | 0,02        |
| STM3774 |      | 0,86        | 0,07        | 1,34         | 0,07        |
| STM3775 |      | <b>4,39</b> | <b>0,03</b> | <b>0,38</b>  | <b>0,03</b> |
| STM3779 |      | 0,72        | 0,00        | 1,48         | 0,07        |
| STM3780 |      | 0,92        | 0,08        | 1,44         | 0,07        |
| STM3781 |      | 0,65        | 0,06        | 1,31         | 0,08        |
| STM3782 |      | 0,85        | 0,09        | 0,70         | 0,07        |
| STM3783 |      | <b>0,16</b> | <b>0,03</b> | <b>10,40</b> | <b>0,00</b> |
| STM3784 |      | <b>1,92</b> | <b>0,05</b> | <b>0,30</b>  | <b>0,02</b> |
| STM3789 | uhpB | <b>0,07</b> | <b>0,02</b> | 0,92         | 0,07        |
| STM3790 | uhpA | 0,91        | 0,07        | 0,74         | 0,03        |
| STM3824 | torR | 1,04        | 0,04        | <b>0,41</b>  | <b>0,05</b> |
| STM3826 | torS | <b>3,13</b> | <b>0,04</b> | 0,86         | 0,09        |
| STM4005 | glnG | 0,68        | 0,02        | <b>10,34</b> | <b>0,00</b> |
| STM4009 | typA | 1,25        | 0,02        | 0,66         | 0,01        |
| STM4058 | cpxA | 0,67        | 0,05        | 1,19         | 0,07        |
| STM4059 | cpxR |             |             |              |             |
| STM4173 | hydH | <b>0,50</b> | <b>0,01</b> | 0,93         | 0,08        |
| STM4174 | hydG | 0,76        | 0,03        | 1,52         | 0,01        |
| STM4185 | aceK | 0,81        | 0,08        | 1,11         | 0,09        |
| STM4257 |      | 0,73        | 0,01        | 1,50         | 0,05        |
| STM4258 |      | 0,83        | 0,02        | 1,13         | 0,06        |
| STM4259 |      | 0,99        | 0,09        | 0,55         | 0,02        |
| STM4260 |      | 1,12        | 0,03        | <b>2,97</b>  | <b>0,04</b> |
| STM4261 |      | <b>5,35</b> | <b>0,04</b> | 1,12         | 0,05        |
| STM4262 |      | 0,75        | 0,02        | 1,90         | 0,03        |
| STM4264 | yjcC | 0,84        | 0,05        | 1,72         | 0,01        |

|         |      |      |      |      |      |
|---------|------|------|------|------|------|
| STM4291 | basS | 0,67 | 0,02 | 3,49 | 0,01 |
| STM4292 | basR | 1,36 | 0,03 | 0,68 | 0,00 |
| STM4304 | dcuS | 0,24 | 0,03 | 0,68 | 0,05 |
| STM4532 | yjiY | 0,65 | 0,06 | 0,89 | 0,08 |
| STM4534 |      | 0,94 | 0,05 | 0,72 | 0,03 |
| STM4547 | yjjQ | 0,85 | 0,02 | 1,46 | 0,07 |
| STM4548 | bglJ | 0,27 | 0,03 | 1,33 | 0,08 |
| STM4551 |      | 0,74 | 0,04 | 0,57 | 0,02 |
| STM4588 | creB | 3,26 | 0,04 | 1,13 | 0,07 |
| STM4589 | creC | 1,22 | 0,08 | 1,29 | 0,07 |
| STM4598 | arcA | 0,76 | 0,03 | 1,43 | 0,06 |

### Surface structure

|         |      |       |      |      |      |
|---------|------|-------|------|------|------|
| STM0319 | crl  | 1,20  | 0,08 | 0,46 | 0,01 |
| STM0543 | fimA | 1,05  | 0,02 | 0,66 | 0,01 |
| STM0544 | fimI | 8,45  | 0,01 | 1,14 | 0,09 |
| STM0545 | fimC |       |      | 0,57 | 0,05 |
| STM0548 | fimF | 0,96  | 0,08 | 0,70 | 0,02 |
| STM0549 | fimZ | 0,79  | 0,07 | 0,96 | 0,09 |
| STM1139 | csgG | 0,81  | 0,06 | 1,44 | 0,05 |
| STM1140 | csgF | 0,84  | 0,02 | 0,68 | 0,03 |
| STM1141 | csgE | 0,85  | 0,04 | 2,51 | 0,05 |
| STM1143 | csgB | 0,77  | 0,04 | 1,42 | 0,07 |
| STM1144 | csgA | 0,26  | 0,02 | 0,28 | 0,01 |
| STM1171 | flgN | 0,10  | 0,00 | 4,35 | 0,01 |
| STM1172 | flgM | 0,12  | 0,05 | 2,99 | 0,00 |
| STM1173 | flgA | 2,46  | 0,04 | 0,65 | 0,03 |
| STM1174 | flgB | 20,72 |      | 0,53 | 0,02 |
| STM1175 | flgC | 1,13  | 0,04 | 0,68 | 0,03 |
| STM1176 | flgD | 0,76  | 0,01 | 1,62 | 0,03 |
| STM1177 | flgE | 0,86  | 0,02 | 3,33 | 0,01 |
| STM1178 | flgF | 1,13  | 0,04 | 0,62 | 0,02 |
| STM1179 | flgG | 0,88  | 0,04 | 2,55 | 0,05 |
| STM1180 | flgH | 4,02  | 0,02 | 1,79 | 0,06 |
| STM1181 | flgI | 1,10  | 0,04 | 0,66 | 0,02 |
| STM1182 | flgJ | 0,84  | 0,02 | 6,84 | 0,02 |
| STM1183 | flgK | 0,79  | 0,02 | 0,61 | 0,00 |
| STM1184 | flgL | 0,94  | 0,10 | 0,58 | 0,06 |
| STM1807 | dsbB | 0,90  | 0,02 | 0,68 | 0,02 |
| STM1924 | flhC | 0,86  | 0,07 | 0,61 | 0,06 |
| STM1925 | flhD | 1,01  | 0,10 | 1,02 | 0,10 |
| STM1956 | fliA | 1,43  | 0,06 | 2,33 | 0,00 |
| STM1959 | fliC | 0,74  | 0,01 | 0,72 | 0,03 |
| STM1960 | fliD | 0,79  | 0,04 | 0,62 | 0,07 |
| STM1961 | fliS | 1,61  | 0,06 | 2,04 | 0,03 |
| STM1962 | fliT | 0,64  | 0,02 | 1,73 | 0,01 |

|         |      |      |      |      |      |
|---------|------|------|------|------|------|
| STM1968 | fliE |      |      | 2,37 | 0,00 |
| STM1969 | fliF |      |      | 0,39 | 0,00 |
| STM1970 | fliG | 0,84 | 0,03 | 7,18 | 0,02 |
| STM1971 | fliH | 0,54 | 0,00 | 0,49 | 0,01 |
| STM1972 | fliI | 1,00 | 0,10 | 2,06 | 0,00 |
| STM1973 | fliJ | 0,96 | 0,09 | 1,43 | 0,04 |
| STM1974 | fliK | 1,04 | 0,08 | 0,69 | 0,03 |
| STM1975 | fliL | 0,93 | 0,04 | 1,02 | 0,09 |
| STM1976 | fliM | 0,30 | 0,00 | 3,29 | 0,01 |
| STM1977 | fliN | 2,05 | 0,05 | 1,68 | 0,03 |
| STM1978 | fliO | 1,74 | 0,05 | 0,34 | 0,02 |
| STM1979 | fliP | 0,50 | 0,04 | 3,09 | 0,03 |
| STM1980 | fliQ | 0,50 | 0,02 | 0,97 | 0,09 |
| STM1981 | fliR | 1,10 | 0,08 | 1,17 | 0,09 |
| STM3043 | dsbC | 0,91 | 0,05 | 0,57 | 0,00 |

### Translation, ribosomal structure and biogenesis

|         |       |      |      |      |      |
|---------|-------|------|------|------|------|
| STM0043 | rpsT  | 1,34 | 0,01 | 0,50 | 0,03 |
| STM0046 | ileS  | 3,74 | 0,02 | 0,13 | 0,00 |
| STM0090 | ksgA  | 3,95 | 0,02 | 0,24 | 0,01 |
| STM0095 | rluA  | 0,09 | 0,02 | 1,42 | 0,02 |
| STM0185 | yadB  | 1,98 | 0,05 | 1,30 | 0,06 |
| STM0188 | ligT  | 1,19 | 0,03 | 3,23 | 0,00 |
| STM0215 | map   | 1,07 | 0,05 | 0,66 | 0,01 |
| STM0216 | rpsB  | 1,47 | 0,00 | 0,61 | 0,02 |
| STM0217 | tsf   | 2,90 | 0,03 | 0,13 | 0,01 |
| STM0219 | frr   | 1,15 | 0,01 | 0,94 | 0,06 |
| STM0240 | yaeJ  | 0,38 | 0,05 | 1,32 | 0,03 |
| STM0242 | proS  | 1,38 | 0,00 | 0,35 | 0,00 |
| STM0315 | prfH  | 0,63 | 0,02 | 1,15 | 0,08 |
| STM0404 | queA  | 1,27 | 0,07 | 0,77 | 0,08 |
| STM0469 | rpmE2 | 0,62 | 0,04 | 4,21 | 0,02 |
| STM0470 | rpmJ2 | 3,18 | 0,03 | 0,14 | 0,01 |
| STM0537 | cysS  | 0,86 | 0,04 | 0,65 | 0,00 |
| STM0617 | rna   | 1,00 | 0,10 | 0,62 | 0,02 |
| STM0648 | leuS  | 0,73 | 0,07 | 1,15 | 0,09 |
| STM0670 | miaB  | 1,13 | 0,03 | 1,30 | 0,05 |
| STM0686 | glnS  | 0,85 | 0,03 | 0,76 | 0,00 |
| STM0852 | yliG  | 3,45 | 0,03 | 0,38 | 0,01 |
| STM0882 | ybjF  | 0,55 | 0,07 | 3,07 | 0,02 |
| STM0953 | infA  | 1,51 | 0,06 | 1,11 | 0,09 |
| STM0963 | serS  | 1,22 | 0,08 | 0,67 | 0,07 |
| STM0981 | rpsA  | 0,98 | 0,10 | 1,00 | 0,10 |
| STM1000 | asnS  | 1,00 | 0,10 | 0,47 | 0,00 |
| STM1066 | rmf   | 1,25 | 0,01 | 0,83 | 0,05 |
| STM1167 | rimJ  | 0,67 | 0,06 | 0,49 | 0,02 |

|         |      |             |             |             |             |
|---------|------|-------------|-------------|-------------|-------------|
| STM1185 | rne  | 0,91        | 0,04        | 0,69        | 0,02        |
| STM1187 | rluC | <b>2,41</b> | <b>0,00</b> | 0,92        | 0,09        |
| STM1191 | rpmF | 0,82        | 0,03        | 0,73        | 0,00        |
| STM1234 | trmU | <b>2,79</b> | <b>0,02</b> | <b>0,19</b> | <b>0,03</b> |
| STM1237 | ymfC | 0,81        | 0,02        | 1,24        | 0,07        |
| STM1333 | thrS | 1,00        | 0,10        | 0,64        | 0,02        |
| STM1334 | infC |             |             |             |             |
| STM1335 | rpml | 1,31        | 0,02        | 0,51        | 0,02        |
| STM1336 | rpIT | 1,10        | 0,03        | 0,55        | 0,02        |
| STM1337 | pheS | 0,93        | 0,06        | 0,54        | 0,03        |
| STM1449 | tyrS | 0,85        | 0,09        | 0,83        | 0,09        |
| STM1502 | speG | 1,21        | 0,05        | 1,36        | 0,08        |
| STM1548 |      | 0,71        | 0,02        | 0,75        | 0,04        |
| STM1549 |      | 1,43        | 0,07        | <b>2,76</b> | <b>0,00</b> |
| STM1550 |      | 0,76        | 0,08        | 1,14        | 0,08        |
| STM1611 | rimL | 0,80        | 0,03        | 0,75        | 0,01        |
| STM1706 | yciH | 0,99        | 0,09        | <b>0,49</b> | <b>0,01</b> |
| STM1719 | yciL | 0,84        | 0,03        | 1,14        | 0,05        |
| STM1720 | yciO | 1,09        | 0,08        | 0,55        | 0,00        |
| STM1775 | hemK | 0,89        | 0,06        | 0,64        | 0,01        |
| STM1776 | prfA | <b>0,36</b> | <b>0,04</b> | 1,13        | 0,06        |
| STM1783 | pth  | 0,80        | 0,00        | 1,26        | 0,04        |
| STM1784 | ychF | 0,86        | 0,05        | 0,80        | 0,05        |
| STM1817 | rnd  | 0,64        | 0,07        | 0,54        | 0,05        |
| STM1822 | yoaB | 0,98        | 0,08        | 0,89        | 0,07        |
| STM1850 | yebU | 0,85        | 0,08        | 1,05        | 0,09        |
| STM1901 | aspS | 0,74        | 0,07        | 0,70        | 0,06        |
| STM1909 | argS | 1,14        | 0,03        | 0,57        | 0,00        |
| STM2155 | metG | 1,09        | 0,07        | 0,78        | 0,02        |
| STM2174 | yohl | <b>0,27</b> | <b>0,02</b> | 0,86        | 0,06        |
| STM2211 | yeiP | 1,19        | 0,01        | 1,42        | 0,04        |
| STM2222 | rsuA | 1,37        | 0,00        | 1,09        | 0,08        |
| STM2224 | rplY | <b>0,15</b> | <b>0,01</b> | 0,60        | 0,01        |
| STM2368 | truA | 0,98        | 0,09        | 1,45        | 0,07        |
| STM2385 | yfcB | 0,84        | 0,02        | 0,59        | 0,00        |
| STM2415 | gltX | 1,24        | 0,04        | 1,17        | 0,08        |
| STM2545 |      | 0,98        | 0,06        | 0,91        | 0,08        |
| STM2648 | yfiF | 1,14        | 0,03        | <b>0,47</b> | <b>0,02</b> |
| STM2662 | rluD | 0,92        | 0,06        | 0,81        | 0,04        |
| STM2665 | yfiA | 0,57        | 0,00        | 0,86        | 0,05        |
| STM2674 | trmD | 0,88        | 0,03        | 0,64        | 0,01        |
| STM2675 | rimM | 1,14        | 0,02        | 0,84        | 0,04        |
| STM2676 | rpsP | 1,40        | 0,06        | 0,93        | 0,09        |
| STM2685 | smpA | 1,05        | 0,08        | 0,59        | 0,02        |
| STM2827 | alaS | 0,67        | 0,07        | 0,93        | 0,09        |
| STM2957 | ygcA | 1,07        | 0,06        | 0,82        | 0,06        |

|         |      |             |             |             |             |
|---------|------|-------------|-------------|-------------|-------------|
| STM2964 | yqcB | 1,24        | 0,09        | 1,05        | 0,10        |
| STM3040 | lysS | 1,22        | 0,00        | 0,74        | 0,03        |
| STM3041 | prfB | 0,68        | 0,02        | 1,96        | 0,05        |
| STM3204 | cca  | 0,58        | 0,07        | <b>2,18</b> | <b>0,05</b> |
| STM3209 | rpsU | 1,44        | 0,06        | 1,09        | 0,09        |
| STM3220 | ygjO | 0,84        | 0,07        | 0,97        | 0,09        |
| STM3282 | pnp  | 0,97        | 0,06        | 0,75        | 0,02        |
| STM3283 | rpsO | 1,03        | 0,08        | 0,88        | 0,07        |
| STM3284 | truB | 1,19        | 0,03        | 1,31        | 0,07        |
| STM3285 | rbfA | 0,79        | 0,03        | 0,95        | 0,08        |
| STM3286 | infB | 1,18        | 0,01        | 0,75        | 0,01        |
| STM3297 | ftsJ | 1,05        | 0,06        | 0,93        | 0,09        |
| STM3298 | yhbY | 0,81        | 0,00        | 0,77        | 0,05        |
| STM3303 | rpmA | 1,18        | 0,04        | 0,52        | 0,02        |
| STM3304 | rplU | 1,57        | 0,03        | 1,79        | 0,06        |
| STM3321 | yhbH | 1,00        | 0,10        | 0,78        | 0,08        |
| STM3344 | rpsI | 1,26        | 0,01        | 0,82        | 0,05        |
| STM3345 | rplM | 1,23        | 0,02        | 0,54        | 0,03        |
| STM3370 | cafA | 0,98        | 0,09        | 0,70        | 0,04        |
| STM3383 | prmA | 0,89        | 0,06        | 0,64        | 0,02        |
| STM3384 | yhdG | 0,98        | 0,05        | 0,81        | 0,05        |
| STM3402 | yrdC | 1,06        | 0,07        | 0,59        | 0,01        |
| STM3406 | def  | 0,98        | 0,09        | 0,81        | 0,08        |
| STM3407 | fmt  | 1,47        | 0,05        | 0,74        | 0,07        |
| STM3408 | sun  | <b>3,11</b> | <b>0,03</b> | <b>0,12</b> | <b>0,01</b> |
| STM3414 | rplQ | 1,04        | 0,06        | 0,55        | 0,00        |
| STM3416 | rpsD | 1,47        | 0,00        | 0,66        | 0,03        |
| STM3417 | rpsK | 1,11        | 0,06        | 0,64        | 0,01        |
| STM3418 | rpsM | 1,84        | 0,01        | 1,34        | 0,08        |
| STM3419 | rpmJ | 1,13        | 0,03        | 0,57        | 0,02        |
| STM3421 | rplO | 1,33        | 0,03        | 1,07        | 0,09        |
| STM3422 | rpmD | 0,88        | 0,01        | 0,54        | 0,00        |
| STM3423 | rpsE | 1,41        | 0,00        | 1,42        | 0,08        |
| STM3424 | rplR | 0,99        | 0,10        | 0,81        | 0,05        |
| STM3425 | rplF | 1,11        | 0,07        | 0,59        | 0,00        |
| STM3426 | rpsH | 1,61        | 0,02        | 1,16        | 0,09        |
| STM3427 | rpsN | 0,99        | 0,09        | 0,58        | 0,01        |
| STM3428 | rplE | 1,06        | 0,03        | 0,67        | 0,01        |
| STM3429 | rplX | 0,93        | 0,06        | 0,52        | 0,00        |
| STM3430 | rplN | 0,92        | 0,07        | 0,61        | 0,01        |
| STM3431 | rpsQ | 1,04        | 0,09        | 1,05        | 0,10        |
| STM3432 | rpmC | 0,99        | 0,10        | 0,75        | 0,01        |
| STM3433 | rplP | 0,79        | 0,03        | 0,63        | 0,01        |
| STM3434 | rpsC | 1,00        | 0,10        | <b>0,41</b> | <b>0,00</b> |
| STM3435 | rplV | 1,20        | 0,04        | 0,99        | 0,10        |
| STM3436 | rpsS | 0,97        | 0,09        | 0,77        | 0,02        |



|         |       |             |             |             |             |
|---------|-------|-------------|-------------|-------------|-------------|
| STM3437 | rplB  | 0,79        | 0,04        | 0,65        | 0,01        |
| STM3438 | rplW  | 0,63        | 0,03        | 0,70        | 0,01        |
| STM3439 | rplD  | 1,05        | 0,08        | <b>0,50</b> | <b>0,01</b> |
| STM3440 | rplC  | 1,16        | 0,03        | 1,04        | 0,10        |
| STM3441 | rpsJ  | 1,00        | 0,10        | 0,74        | 0,03        |
| STM3445 | tufA  | 1,24        | 0,08        | 0,65        | 0,06        |
| STM3446 | fusA  | 1,80        | 0,02        | 1,42        | 0,07        |
| STM3447 | rpsG  | 0,77        | 0,04        | 0,64        | 0,03        |
| STM3448 | rpsL  | 1,21        | 0,00        | 0,84        | 0,04        |
| STM3481 | trpS  | 1,18        | 0,04        | 0,98        | 0,10        |
| STM3497 | yrfH  | 1,20        | 0,05        | 0,69        | 0,01        |
| STM3655 | glyS  | 0,96        | 0,08        | 1,18        | 0,07        |
| STM3656 | glyQ  | 0,92        | 0,03        | 0,88        | 0,01        |
| STM3682 | selB  | 1,00        | 0,10        | 0,69        | 0,01        |
| STM3695 | yibK  | <b>3,27</b> | <b>0,03</b> | 1,05        | 0,10        |
| STM3727 | rpmG  | 0,59        | 0,04        | 0,93        | 0,08        |
| STM3728 | rpmB  | 1,46        | 0,06        | 1,33        | 0,08        |
| STM3734 | rph   | 0,81        | 0,02        | 0,62        | 0,01        |
| STM3743 | spoU  | 0,93        | 0,08        | 0,88        | 0,02        |
| STM3839 | rpmH  | <b>2,13</b> | <b>0,02</b> | 0,72        |             |
| STM3840 | rnpA  | 1,73        | 0,01        | <b>2,66</b> | <b>0,01</b> |
| STM4028 | yihZ  | 0,89        | 0,04        | 0,66        | 0,02        |
| STM4096 | rpmE  | 1,12        | 0,05        | 1,40        | 0,08        |
| STM4129 | trmA  | 0,95        | 0,05        | 0,89        | 0,07        |
| STM4146 | tufB  | 0,59        |             | <b>0,34</b> |             |
| STM4149 | rplK  | 1,06        | 0,02        | 0,83        | 0,05        |
| STM4150 | rplA  | 0,84        | 0,06        | <b>0,41</b> | <b>0,00</b> |
| STM4151 | rplJ  | 0,63        | 0,06        | 0,93        | 0,10        |
| STM4152 | rplL  | 0,64        | 0,03        | 0,88        | 0,09        |
| STM4193 | yjbC  | 0,92        | 0,06        | 0,54        | 0,00        |
| STM4243 | yjbN  | 0,98        | 0,09        | 0,63        | 0,03        |
| STM4334 | efp   | 1,03        | 0,10        | 0,79        | 0,08        |
| STM4344 | yjeA  | 1,08        | 0,05        | 0,94        | 0,06        |
| STM4360 | miaA  | 0,77        | 0,02        | 0,87        | 0,08        |
| STM4369 | yjfH  | 1,48        | 0,03        | <b>2,44</b> | <b>0,02</b> |
| STM4391 | rpsF  | 1,12        | 0,03        | 0,84        | 0,06        |
| STM4393 | rpsR  | 1,03        | 0,09        | 0,60        | 0,01        |
| STM4394 | rplI  | 0,95        | 0,07        | 0,85        | 0,07        |
| STM4450 |       | 0,54        | 0,00        | 0,93        | 0,09        |
| STM4458 | yjgF  | 1,03        | 0,03        | 0,90        | 0,04        |
| STM4508 | trpS2 | 0,63        | 0,02        | 0,63        | 0,01        |
| STM4556 | rsmC  | 0,70        | 0,04        | <b>2,96</b> | <b>0,02</b> |
| STM4560 | prfC  | 1,24        | 0,04        | <b>8,14</b> | <b>0,00</b> |
| STM4600 | lasT  | <b>0,22</b> | <b>0,03</b> | 0,71        | 0,07        |

## Transcription

|         |      |             |             |             |             |
|---------|------|-------------|-------------|-------------|-------------|
| STM0014 |      | 1,07        | 0,06        | 0,64        | 0,02        |
| STM0017 |      | 1,00        | 0,10        | 1,56        | 0,04        |
| STM0029 |      | 0,98        | 0,09        | 1,38        | 0,05        |
| STM0030 |      | 1,07        | 0,08        | 1,14        | 0,06        |
| STM0031 |      | 1,08        | 0,05        | 0,61        | 0,02        |
| STM0040 | nhaR | 1,32        | 0,01        | 0,60        | 0,00        |
| STM0052 |      | <b>0,49</b> | <b>0,03</b> | <b>5,23</b> | <b>0,00</b> |
| STM0104 | araC | 0,97        | 0,07        | 1,61        | 0,06        |
| STM0115 | leuO | 0,69        | 0,01        | 1,36        | 0,05        |
| STM0118 | fruR | 0,60        | 0,01        | 0,80        | 0,00        |
| STM0151 | pdhR | 1,00        | 0,10        | 0,55        | 0,00        |
| STM0164 |      | 1,01        | 0,10        | <b>0,49</b> | <b>0,01</b> |
| STM0210 | cdaR | 1,31        | 0,08        | 1,39        | 0,08        |
| STM0256 | yafC | 0,94        | 0,09        | 0,62        | 0,06        |
| STM0304 | sinR | 0,91        | 0,03        | <b>2,81</b> | <b>0,04</b> |
| STM0333 |      | <b>0,28</b> | <b>0,03</b> | <b>0,31</b> | <b>0,02</b> |
| STM0347 |      | 0,67        | 0,08        | <b>0,47</b> | <b>0,04</b> |
| STM0354 |      | <b>0,35</b> | <b>0,02</b> | 1,11        | 0,06        |
| STM0363 |      | 1,56        | 0,05        | 1,06        | 0,09        |
| STM0410 |      | 1,33        | 0,07        | 1,28        | 0,07        |
| STM0418 | nusB | 1,26        | 0,07        | 0,61        | 0,06        |
| STM0430 | phnR | 1,42        | 0,03        | 0,68        | 0,04        |
| STM0459 | ybaO | 0,79        | 0,08        | <b>0,42</b> | <b>0,04</b> |
| STM0477 | acrR | 0,74        | 0,07        | 1,30        | 0,09        |
| STM0499 | cueR | 1,02        | 0,08        | 0,74        | 0,00        |
| STM0514 | ybbS | 1,23        | 0,09        | 0,94        | 0,09        |
| STM0516 | allR | 1,84        | 0,01        | 1,39        | 0,07        |
| STM0552 | fimW | 0,73        | 0,03        | 1,23        | 0,05        |
| STM0571 |      | 1,09        | 0,07        | 1,27        | 0,08        |
| STM0580 |      | 1,45        | 0,03        | 0,98        | 0,09        |
| STM0581 |      | <b>0,32</b> | <b>0,02</b> | 0,52        | 0,02        |
| STM0604 | ybdM | 0,65        | 0,02        | 0,75        | 0,01        |
| STM0606 | ybdO | 0,76        | 0,01        | 1,02        | 0,10        |
| STM0616 | rnk  | 1,24        | 0,01        | 1,49        | 0,06        |
| STM0626 | dpiA | 1,18        | 0,03        | <b>3,33</b> | <b>0,02</b> |
| STM0629 | cspE | 1,16        | 0,02        | 0,60        | 0,00        |
| STM0634 | ybeF | 1,45        | 0,01        | <b>2,98</b> | <b>0,03</b> |
| STM0652 |      | 0,99        | 0,10        | <b>0,30</b> | <b>0,01</b> |
| STM0682 | nagC | 0,71        | 0,01        | 0,65        | 0,00        |
| STM0692 |      | 1,00        | 0,10        | 1,15        | 0,08        |
| STM0763 |      | 1,00        | 0,10        | <b>0,20</b> | <b>0,00</b> |
| STM0764 |      | 1,03        | 0,08        | 0,56        | 0,02        |
| STM0789 | hutC | 1,49        | 0,01        | 1,04        | 0,04        |
| STM0819 | ybiH | 1,12        | 0,02        | 1,08        | 0,08        |
| STM0821 | dinG | <b>0,12</b> | <b>0,02</b> | 0,91        | 0,06        |
| STM0835 |      | 0,63        | 0,05        | 0,53        | 0,01        |

|         |        |       |      |       |      |
|---------|--------|-------|------|-------|------|
| STM0859 |        | 4,04  | 0,01 | 1,04  | 0,10 |
| STM0898 |        |       |      |       |      |
| STM0900 |        |       |      |       |      |
| STM0943 | cspD   | 1,12  | 0,05 | 0,71  | 0,04 |
| STM0952 |        | 4,79  | 0,00 | 0,41  | 0,04 |
| STM0959 | lrp    | 1,59  | 0,03 | 0,36  | 0,00 |
| STM1001 |        | 0,54  | 0,06 | 18,49 | 0,00 |
| STM1012 |        | 1,04  | 0,06 | 0,78  | 0,06 |
| STM1072 | yccR   | 0,91  | 0,09 | 2,33  | 0,04 |
| STM1082 |        | 0,72  | 0,01 | 0,48  | 0,02 |
| STM1100 | hpaR   | 0,66  | 0,05 | 2,86  | 0,04 |
| STM1108 | hpaA   | 1,05  | 0,07 | 0,61  | 0,03 |
| STM1122 | ydcC   | 0,99  | 0,10 | 1,14  | 0,09 |
| STM1127 |        | 0,95  | 0,09 | 0,84  | 0,08 |
| STM1142 | csgD   | 1,09  | 0,07 | 2,66  | 0,01 |
| STM1172 | flgM   | 0,12  | 0,05 | 2,99  | 0,00 |
| STM1213 | yfcQ   | 1,76  | 0,05 | 0,83  | 0,08 |
| STM1220 | yfcX   | 0,77  | 0,00 | 0,87  | 0,01 |
| STM1221 | cobB   | 1,15  | 0,06 | 0,73  | 0,02 |
| STM1243 |        | 1,85  | 0,01 | 1,26  | 0,03 |
| STM1265 |        | 3,06  | 0,00 | 0,94  | 0,09 |
| STM1279 | yeaM   | 0,54  | 0,04 | 0,84  | 0,08 |
| STM1315 | celD   | 0,98  | 0,08 | 7,52  | 0,02 |
| STM1355 | ydiP   | 0,85  | 0,03 | 2,66  | 0,05 |
| STM1382 | orf408 | 0,94  | 0,08 | 1,61  | 0,00 |
| STM1390 | orf242 | 0,84  | 0,04 | 0,41  | 0,02 |
| STM1429 | ydhB   | 0,65  | 0,05 | 0,62  | 0,06 |
| STM1430 | purR   | 0,48  | 0,05 | 1,25  | 0,08 |
| STM1437 | ydhM   | 0,95  | 0,04 | 0,72  | 0,03 |
| STM1444 | slyA   | 0,97  | 0,10 | 1,01  | 0,10 |
| STM1487 | ynfL   | 0,76  | 0,07 | 6,20  | 0,01 |
| STM1488 | mlc    | 1,08  | 0,09 | 1,49  | 0,07 |
| STM1510 | ydfH   | 1,20  | 0,03 | 0,71  | 0,02 |
| STM1519 | marA   | 0,97  | 0,10 | 5,76  | 0,03 |
| STM1520 | marR   | 5,15  | 0,03 | 0,78  | 0,08 |
| STM1523 | yneJ   | 1,06  | 0,08 | 0,59  | 0,01 |
| STM1541 |        | 18,59 | 0,00 | 0,79  | 0,08 |
| STM1547 |        | 10,08 | 0,04 | 0,21  | 0,00 |
| STM1555 |        | 1,04  | 0,09 | 4,14  | 0,02 |
| STM1575 |        | 1,59  | 0,01 | 2,10  | 0,01 |
| STM1588 | yncC   | 0,74  | 0,08 | 0,97  | 0,10 |
| STM1598 | ydcR   | 0,83  | 0,09 | 0,54  | 0,05 |
| STM1605 | ydcN   | 1,12  | 0,09 | 5,37  | 0,01 |
| STM1618 |        | 1,61  | 0,02 | 1,46  | 0,06 |
| STM1619 |        | 1,32  | 0,04 | 2,29  | 0,00 |
| STM1625 | ydcl   | 1,67  | 0,05 | 10,19 | 0,02 |

|         |      |      |      |      |      |
|---------|------|------|------|------|------|
| STM1664 |      | 1,58 | 0,00 | 0,79 | 0,06 |
| STM1671 |      | 2,80 | 0,03 | 0,15 | 0,01 |
| STM1674 |      | 0,28 | 0,01 | 2,02 | 0,01 |
| STM1677 |      | 1,45 | 0,07 | 0,93 | 0,09 |
| STM1688 | pspC |      |      |      |      |
| STM1690 | pspA |      |      |      |      |
| STM1704 | yciT | 1,30 | 0,02 | 0,77 | 0,05 |
| STM1713 | cysB | 1,07 | 0,06 | 1,76 | 0,06 |
| STM1805 | fadR | 1,09 | 0,07 | 0,99 | 0,10 |
| STM1821 | yoaA | 0,48 | 0,01 | 0,63 | 0,03 |
| STM1837 | cspC | 1,42 | 0,00 | 0,62 | 0,03 |
| STM1842 | kdgR | 3,70 | 0,03 | 0,12 | 0,01 |
| STM1857 |      | 1,25 | 0,02 | 0,63 | 0,06 |
| STM1887 | yebK | 3,76 | 0,02 | 0,22 | 0,02 |
| STM1950 | sdiA | 3,60 | 0,02 | 0,15 | 0,01 |
| STM1956 | fliA | 1,43 | 0,06 | 2,33 | 0,00 |
| STM1982 | rcsA | 2,32 | 0,00 | 2,07 | 0,04 |
| STM1996 | cspB | 9,31 | 0,01 | 0,32 | 0,04 |
| STM1998 | umuD | 1,46 | 0,02 | 1,27 | 0,08 |
| STM2145 | yegW | 1,12 | 0,07 | 0,70 | 0,06 |
| STM2158 | yehT | 2,19 | 0,04 | 0,53 | 0,03 |
| STM2160 | yehV | 3,57 | 0,03 | 0,14 | 0,01 |
| STM2180 |      | 1,80 | 0,04 | 0,67 | 0,03 |
| STM2191 | galS | 1,17 | 0,08 | 2,36 | 0,02 |
| STM2201 | yeiE | 1,02 | 0,07 | 0,67 | 0,00 |
| STM2223 | yejH | 0,84 | 0,02 | 0,93 | 0,05 |
| STM2230 |      | 0,89 | 0,06 | 1,62 | 0,04 |
| STM2275 |      | 0,76 | 0,01 | 1,94 | 0,04 |
| STM2281 |      | 0,37 | 0,02 | 1,74 | 0,06 |
| STM2292 | yfaX | 0,53 | 0,04 | 0,88 | 0,06 |
| STM2330 | lrhA | 0,92 | 0,06 | 0,69 | 0,03 |
| STM2345 |      | 0,80 | 0,04 | 0,49 | 0,01 |
| STM2361 |      | 1,09 | 0,05 | 1,73 | 0,05 |
| STM2374 |      | 1,40 | 0,02 | 0,45 | 0,01 |
| STM2420 | xapR | 1,05 | 0,08 | 1,18 | 0,06 |
| STM2424 | yfeR | 0,99 | 0,10 | 1,47 | 0,05 |
| STM2436 | ptsJ | 0,83 | 0,05 | 0,67 | 0,02 |
| STM2454 | eutR | 0,42 | 0,04 | 0,71 | 0,07 |
| STM2544 | yfhP | 1,99 | 0,02 | 1,28 | 0,08 |
| STM2553 | csiE | 0,87 | 0,08 | 1,39 | 0,08 |
| STM2557 | cadC | 0,86 | 0,03 | 0,53 | 0,00 |
| STM2572 | yfhH | 0,30 | 0,02 | 0,84 | 0,08 |
| STM2575 |      | 2,27 | 0,00 | 2,08 | 0,04 |
| STM2581 | rnc  | 0,91 | 0,05 | 0,78 | 0,05 |
| STM2640 | rpoE | 3,84 | 0,02 | 0,13 | 0,01 |
| STM2644 | yfiE | 2,17 | 0,01 | 0,98 | 0,09 |

|         |      |       |      |      |      |
|---------|------|-------|------|------|------|
| STM2738 |      |       |      |      |      |
| STM2744 |      |       | 0,10 | 0,01 |      |
| STM2748 |      | 2,46  | 0,02 | 0,47 | 0,00 |
| STM2749 |      | 0,81  | 0,01 | 1,50 | 0,06 |
| STM2794 | ygaE | 0,61  | 0,06 | 3,50 | 0,01 |
| STM2797 |      | 0,98  | 0,09 | 1,18 | 0,08 |
| STM2803 |      | 0,48  | 0,01 | 0,63 | 0,00 |
| STM2813 | emrR | 1,05  | 0,08 | 0,51 | 0,02 |
| STM2837 | srlR | 0,91  | 0,06 | 0,91 | 0,07 |
| STM2839 | ygaA | 0,17  |      | 0,63 |      |
| STM2859 | fhIA | 1,12  | 0,04 | 0,77 | 0,01 |
| STM2866 | sprB | 0,98  | 0,08 | 1,79 | 0,06 |
| STM2867 | hilC | 0,02  | 0,00 | 1,28 | 0,08 |
| STM2875 | hilD | 0,63  | 0,01 | 1,38 | 0,06 |
| STM2876 | hilA | 0,09  | 0,00 | 0,26 | 0,00 |
| STM2899 | invF | 3,92  | 0,05 | 1,45 | 0,01 |
| STM2905 |      | 0,65  | 0,05 | 1,05 | 0,09 |
| STM2912 |      | 3,50  | 0,02 | 0,13 | 0,01 |
| STM2919 | ygbI | 0,88  | 0,09 | 2,92 | 0,01 |
| STM2920 |      | 0,61  | 0,04 | 0,40 | 0,00 |
| STM2924 | rpoS | 2,38  | 0,02 | 0,28 | 0,03 |
| STM2955 |      | 0,88  | 0,03 | 0,78 | 0,07 |
| STM2979 | fucR | 0,95  | 0,08 | 0,91 | 0,08 |
| STM2982 | gcvA | 0,95  | 0,07 | 0,74 | 0,04 |
| STM3011 | galR | 0,90  | 0,03 | 0,82 | 0,03 |
| STM3012 |      | 0,74  | 0,02 | 0,71 | 0,01 |
| STM3014 | lysR | 4,86  | 0,03 | 0,29 | 0,03 |
| STM3020 |      | 1,65  | 0,00 | 1,30 | 0,02 |
| STM3025 |      | 0,51  | 0,03 | 0,31 | 0,02 |
| STM3064 | iciA | 13,89 | 0,01 | 1,29 | 0,09 |
| STM3084 |      | 1,02  | 0,09 | 0,68 | 0,02 |
| STM3096 | yqgE | 1,56  | 0,06 | 1,96 | 0,06 |
| STM3098 |      | 0,29  | 0,03 | 5,13 | 0,00 |
| STM3121 |      | 0,92  | 0,07 | 0,73 | 0,02 |
| STM3124 |      | 1,03  | 0,10 | 1,42 | 0,07 |
| STM3163 | yqhC | 2,98  | 0,03 | 0,20 | 0,02 |
| STM3175 |      | 1,23  | 0,09 | 0,96 | 0,09 |
| STM3211 | rpoD | 0,73  | 0,01 | 0,63 | 0,02 |
| STM3215 | yqjI | 0,85  | 0,07 | 0,85 | 0,06 |
| STM3235 | yhaJ | 0,69  | 0,07 | 2,48 | 0,02 |
| STM3245 | tdcA | 1,56  | 0,03 | 3,49 | 0,00 |
| STM3252 | agaR | 0,59  | 0,03 | 1,11 | 0,09 |
| STM3262 |      | 1,35  | 0,07 | 2,78 | 0,02 |
| STM3287 | nusA | 0,80  | 0,08 | 1,16 | 0,09 |
| STM3299 | greA | 1,08  | 0,03 | 0,73 | 0,04 |
| STM3306 | nlp  | 1,10  | 0,08 | 0,81 | 0,03 |

|         |      |             |             |             |             |
|---------|------|-------------|-------------|-------------|-------------|
| STM3320 | rpoN | 1,18        | 0,05        | 1,37        | 0,07        |
| STM3336 | nanK | 0,67        | 0,04        | 1,21        | 0,04        |
| STM3340 | yhcK | 1,03        | 0,08        | 0,97        | 0,09        |
| STM3357 |      | 1,02        | 0,09        | 0,52        | 0,02        |
| STM3358 |      | 1,21        | 0,02        | 1,68        | 0,00        |
| STM3363 | yhcO | 0,89        | 0,05        | 0,68        | 0,03        |
| STM3367 | yhcS |             |             |             |             |
| STM3385 | fis  | <b>0,34</b> | <b>0,02</b> | 0,69        | 0,02        |
| STM3389 | envR | <b>0,34</b> | <b>0,00</b> | 1,58        | 0,04        |
| STM3412 | zntR | 0,94        | 0,07        | 0,73        | 0,04        |
| STM3415 | rpoA | 1,50        | 0,00        | 0,78        | 0,03        |
| STM3503 | greB | 1,39        | 0,02        | 0,90        | 0,06        |
| STM3515 | malT | 1,16        | 0,06        | 1,32        | 0,08        |
| STM3523 | glpR | 0,99        | 0,03        | 0,74        | 0,02        |
| STM3533 |      | 1,07        | 0,09        | 0,87        | 0,09        |
| STM3543 | gntR | 1,73        | 0,05        | 0,58        | 0,02        |
| STM3546 | yhhY | <b>4,54</b> | <b>0,00</b> | 0,70        | 0,07        |
| STM3568 | rpoH | 1,00        | 0,10        | <b>0,49</b> | <b>0,01</b> |
| STM3584 | nikR | 0,59        | 0,03        | 1,71        | 0,02        |
| STM3602 |      | <b>0,39</b> | <b>0,05</b> | 0,89        | 0,09        |
| STM3607 | yhjC | 1,16        | 0,04        | 1,42        | 0,05        |
| STM3633 |      | 0,90        | 0,04        | 1,03        | 0,09        |
| STM3643 | viaC | 0,75        | 0,01        | 0,80        | 0,01        |
| STM3648 | viaG | 1,17        | 0,09        | 0,83        | 0,07        |
| STM3651 |      | 0,71        | 0,05        | <b>0,34</b> | <b>0,02</b> |
| STM3653 |      | <b>2,14</b> | <b>0,00</b> | <b>2,45</b> | <b>0,04</b> |
| STM3662 | xyIR | <b>0,36</b> | <b>0,02</b> | 1,25        | 0,07        |
| STM3667 | viaJ | 1,12        | 0,06        | 0,86        | 0,06        |
| STM3678 |      | 1,03        | 0,09        | 1,21        | 0,05        |
| STM3681 |      | 1,21        | 0,09        | 0,76        | 0,08        |
| STM3687 | mtlR | 0,76        | 0,03        | 0,87        | 0,09        |
| STM3693 | lldR | 1,05        | 0,07        | 0,68        | 0,03        |
| STM3696 |      | <b>4,38</b> | <b>0,01</b> | 0,80        | 0,01        |
| STM3732 | ttk  | 1,49        | 0,05        | <b>0,47</b> | <b>0,04</b> |
| STM3736 |      | 1,33        | 0,08        | 1,53        | 0,07        |
| STM3741 | rpoZ | 1,42        | 0,02        | 1,40        | 0,08        |
| STM3756 | rmbA | 0,98        | 0,09        | 1,23        | 0,06        |
| STM3759 | marT | 1,81        | 0,06        | 0,75        | 0,07        |
| STM3773 |      | 1,54        | 0,06        | 0,91        | 0,02        |
| STM3778 |      | 1,09        | 0,09        | 1,16        | 0,03        |
| STM3785 |      | 0,55        | 0,03        | 1,14        | 0,09        |
| STM3794 |      | <b>0,31</b> | <b>0,04</b> | 0,99        | 0,10        |
| STM3800 | dsdC | 1,09        | 0,08        | 1,28        | 0,08        |
| STM3830 | dgoR | <b>2,19</b> | <b>0,00</b> | <b>2,03</b> | <b>0,04</b> |
| STM3834 |      | <b>0,24</b> | <b>0,02</b> | <b>7,02</b> | <b>0,01</b> |
| STM3848 | vidZ | 0,93        | 0,01        | 0,75        | 0,04        |

|         |      |             |             |             |             |
|---------|------|-------------|-------------|-------------|-------------|
| STM3876 | asnC | 1,05        | 0,07        | <b>5,57</b> | <b>0,01</b> |
| STM3886 | rbsR | 0,71        | 0,03        | 0,63        | 0,06        |
| STM3888 | yieP | 0,55        | 0,00        | 1,04        | 0,07        |
| STM3897 | yifA | 0,87        | 0,03        | 0,90        | 0,07        |
| STM3908 | ilvY | 0,86        | 0,09        | <b>0,37</b> | <b>0,04</b> |
| STM3917 | rho  | 0,95        | 0,08        | <b>0,46</b> | <b>0,01</b> |
| STM3924 | wecD | 0,98        | 0,09        | 0,81        | 0,07        |
| STM3964 | metR | 0,67        | 0,02        | 0,72        | 0,01        |
| STM3977 | rfaH | 0,73        | 0,07        | 1,18        | 0,08        |
| STM4025 | yihW | 1,47        | 0,05        | 0,55        | 0,01        |
| STM4029 | yiiD | 1,51        | 0,02        | 1,33        | 0,07        |
| STM4033 |      |             |             | <b>0,01</b> |             |
| STM4048 | rhaS | 0,86        | 0,03        | 1,23        | 0,08        |
| STM4049 | rhaR | 0,66        | 0,01        | 0,70        | 0,01        |
| STM4068 |      | 1,62        | 0,02        | 1,43        | 0,04        |
| STM4073 | ydeW | 0,89        | 0,09        | 1,10        | 0,08        |
| STM4094 | cytR | 1,22        | 0,01        | 0,71        | 0,03        |
| STM4117 | yijO | 1,38        | 0,01        | 1,03        | 0,08        |
| STM4125 | oxyR | 0,54        | 0,01        | 0,91        | 0,07        |
| STM4127 | yijC | 0,96        | 0,09        | 0,56        | 0,01        |
| STM4148 | nusG | 0,94        | 0,06        | 0,96        | 0,09        |
| STM4165 | rsd  | 0,87        | 0,01        | 0,75        | 0,02        |
| STM4181 | yjaB | 0,89        | 0,04        | 0,93        | 0,07        |
| STM4187 | iclR | 1,19        | 0,02        | 1,09        | 0,08        |
| STM4237 | lexA | 0,76        | 0,01        | 0,97        | 0,09        |
| STM4265 | soxS | <b>0,49</b> | <b>0,01</b> | <b>0,44</b> | <b>0,00</b> |
| STM4266 | soxR | 0,92        | 0,08        | 1,02        | 0,09        |
| STM4270 |      | <b>0,49</b> | <b>0,03</b> | 1,20        | 0,06        |
| STM4287 | phnO | 1,28        | 0,01        | 0,63        | 0,03        |
| STM4295 | adiY | 0,92        | 0,03        | 1,11        | 0,08        |
| STM4297 | melR | <b>0,44</b> | <b>0,04</b> | 1,19        | 0,05        |
| STM4303 | dcuR | 0,88        | 0,06        | 1,08        | 0,05        |
| STM4314 |      | 0,79        | 0,01        | 1,44        | 0,07        |
| STM4315 |      | 1,04        | 0,09        | 1,26        | 0,08        |
| STM4318 |      | <b>3,63</b> | <b>0,02</b> | 0,84        | 0,05        |
| STM4320 |      | 1,08        | 0,09        | <b>0,50</b> | <b>0,06</b> |
| STM4322 | yjdC | 0,80        | 0,05        | 0,89        | 0,09        |
| STM4337 | ecnR | 0,70        | 0,01        | 0,77        | 0,08        |
| STM4367 | yjeB | 0,95        | 0,08        | 0,51        | 0,01        |
| STM4368 | vacB | <b>3,03</b> | <b>0,03</b> | <b>0,13</b> | <b>0,01</b> |
| STM4371 | yjfJ | 0,73        | 0,00        | 1,53        | 0,06        |
| STM4381 | yjfQ | 0,82        | 0,08        | 1,39        | 0,06        |
| STM4402 | ytfH | 1,01        | 0,10        | 0,52        | 0,02        |
| STM4417 |      | <b>6,24</b> | <b>0,04</b> | 0,71        | 0,02        |
| STM4423 |      | <b>8,13</b> | <b>0,04</b> | 1,24        | 0,03        |
| STM4455 | treR | 0,33        | 0,05        | <b>0,16</b> | <b>0,01</b> |

|         |      |             |             |             |             |
|---------|------|-------------|-------------|-------------|-------------|
| STM4473 | yjgM | 0,94        | 0,07        | 1,10        | 0,09        |
| STM4481 | idnR | 0,86        | 0,00        | 0,88        | 0,01        |
| STM4507 | uxuR | 0,97        | 0,08        | 0,63        | 0,01        |
| STM4511 | yjiE | 1,23        | 0,06        | 1,42        | 0,07        |
| STM4580 | nadR | <b>3,51</b> | <b>0,02</b> | <b>0,18</b> | <b>0,01</b> |
| STM4583 | trpR | 0,59        | 0,02        | 0,87        | 0,08        |
| STM4586 | rob  | <b>4,15</b> | <b>0,03</b> | <b>0,12</b> | <b>0,01</b> |

### Unknown function

|         |      |             |             |              |             |
|---------|------|-------------|-------------|--------------|-------------|
| STM0005 | yaaA | 1,12        | 0,06        | 1,57         | 0,07        |
| STM0009 | yaaH | 0,90        | 0,05        | <b>0,38</b>  | <b>0,01</b> |
| STM0010 | htgA | 0,97        | 0,06        | 0,77         | 0,04        |
| STM0098 |      | 0,99        | 0,10        | 0,65         | 0,02        |
| STM0105 | yabl | 0,87        | 0,04        | <b>2,11</b>  | <b>0,00</b> |
| STM0119 | yabB | 1,55        | 0,03        | 1,46         | 0,07        |
| STM0139 | yacF | 0,90        | 0,02        | 0,61         | 0,01        |
| STM0160 | yacL | 0,87        | 0,02        | 1,07         | 0,08        |
| STM0162 |      | 1,15        | 0,08        | 1,39         | 0,07        |
| STM0204 | yadR | 0,91        | 0,05        | 0,68         | 0,03        |
| STM0205 | yadS | 0,94        | 0,08        | 0,79         | 0,04        |
| STM0239 | yaeQ | 1,71        | 0,06        | <b>15,11</b> | <b>0,00</b> |
| STM0243 | yaeB | 1,08        | 0,09        | <b>4,49</b>  | <b>0,01</b> |
| STM0258 | yafD | 1,07        | 0,07        | 0,80         | 0,05        |
| STM0266 |      | 0,62        | 0,04        | 1,74         | 0,07        |
| STM0267 |      | 0,84        | 0,02        | 1,34         | 0,07        |
| STM0269 |      | <b>0,32</b> | <b>0,04</b> | 1,29         | 0,07        |
| STM0273 |      | 0,89        | 0,05        | 0,72         | 0,02        |
| STM0274 |      | 0,85        | 0,06        | 0,67         | 0,03        |
| STM0276 |      | 1,01        | 0,10        | 1,09         | 0,07        |
| STM0279 |      | 0,73        | 0,01        | 1,62         | 0,06        |
| STM0280 |      | 0,74        | 0,06        | 0,58         | 0,07        |
| STM0281 |      | <b>3,34</b> | <b>0,02</b> | <b>0,17</b>  | <b>0,01</b> |
| STM0282 |      | 0,88        | 0,06        | 0,68         | 0,03        |
| STM0287 |      | 0,77        | 0,02        | 0,78         | 0,02        |
| STM0289 |      | 1,11        | 0,08        | 1,17         | 0,09        |
| STM0312 | yafK | 1,21        | 0,05        | 1,41         | 0,08        |
| STM0381 |      | 1,49        | 0,01        | 0,64         | 0,01        |
| STM0387 | yail | <b>4,03</b> | <b>0,03</b> | <b>2,27</b>  | <b>0,02</b> |
| STM0391 | yaiE | 1,55        | 0,00        | 0,57         | 0,01        |
| STM0403 | yajB | 0,54        | 0,01        | 0,91         | 0,09        |
| STM0435 | yajQ | 0,94        | 0,08        | 1,38         | 0,08        |
| STM0465 | ybaY | 1,17        | 0,08        | 0,76         | 0,08        |
| STM0482 | ybaN | <b>0,36</b> | <b>0,00</b> | <b>5,10</b>  | <b>0,01</b> |
| STM0485 | ybaB | <b>3,82</b> | <b>0,02</b> | <b>0,16</b>  | <b>0,01</b> |
| STM0495 | ybaK | <b>0,11</b> | <b>0,02</b> | 0,71         | 0,08        |
| STM0496 | ybaP | 0,97        | 0,08        | 0,75         | 0,01        |



|         |      |      |      |      |      |
|---------|------|------|------|------|------|
| STM0535 | lpxH | 0,60 | 0,07 | 3,44 | 0,04 |
| STM0538 |      | 1,62 | 0,03 | 8,98 | 0,00 |
| STM0541 | ybcJ | 0,47 |      | 2,52 | 0,00 |
| STM0559 | rfbI | 1,05 | 0,08 | 1,43 | 0,01 |
| STM0566 |      | 1,15 | 0,08 | 1,28 | 0,08 |
| STM0579 | ybdF | 0,24 | 0,03 | 1,63 | 0,06 |
| STM0583 | ybdK | 0,04 | 0,01 | 1,26 | 0,03 |
| STM0587 | ybdZ | 0,14 |      | 1,02 | 0,10 |
| STM0636 | ybeD | 1,03 | 0,07 | 0,62 | 0,02 |
| STM0641 | ybeA | 1,35 | 0,01 | 1,45 | 0,02 |
| STM0642 | ybeB | 1,43 | 0,00 | 0,83 | 0,06 |
| STM0711 | ybgI | 3,32 | 0,03 | 0,15 | 0,01 |
| STM0742 | ybgT | 0,66 | 0,01 | 0,65 | 0,00 |
| STM0743 | ybgE | 0,85 | 0,02 | 1,23 | 0,04 |
| STM0750 | ybgF | 0,85 | 0,03 | 0,86 | 0,05 |
| STM0777 |      | 0,81 | 0,03 | 1,84 | 0,03 |
| STM0800 | slrP | 2,92 | 0,00 | 0,50 | 0,04 |
| STM0801 | ybhK | 0,25 | 0,00 | 2,20 | 0,01 |
| STM0811 | ybhN | 0,80 | 0,03 | 1,03 | 0,09 |
| STM0837 | ybiS | 1,73 | 0,00 | 0,56 | 0,06 |
| STM0869 |      | 2,03 | 0,00 | 2,18 | 0,04 |
| STM0884 |      | 2,07 | 0,00 | 2,16 | 0,04 |
| STM0918 |      |      |      |      |      |
| STM0919 |      |      |      |      |      |
| STM0921 |      |      |      |      |      |
| STM0923 |      |      |      |      |      |
| STM0925 |      |      |      |      |      |
| STM0930 | orfB | 1,04 | 0,09 | 1,38 | 0,08 |
| STM0938 | ybjE | 0,69 | 0,02 | 0,72 | 0,06 |
| STM0940 | ybjX | 1,09 | 0,09 | 0,90 | 0,09 |
| STM0944 | yljA | 1,18 | 0,06 | 1,40 | 0,08 |
| STM0975 | ycaO | 6,09 | 0,03 | 1,11 | 0,09 |
| STM0976 | ycaP | 0,97 | 0,10 | 1,13 | 0,09 |
| STM0986 | ycaQ | 0,48 | 0,02 | 0,43 | 0,04 |
| STM0987 | ycaR | 2,18 | 0,03 | 0,14 | 0,01 |
| STM0990 | ycbC | 0,91 | 0,08 | 0,27 | 0,02 |
| STM0995 | ycbB | 0,81 | 0,05 | 0,82 | 0,08 |
| STM0996 | ycbK | 1,11 | 0,06 | 0,57 | 0,01 |
| STM1041 |      | 0,52 | 0,00 | 6,43 | 0,01 |
| STM1042 |      | 1,16 | 0,03 | 1,06 | 0,09 |
| STM1045 |      | 1,85 | 0,03 | 0,82 | 0,02 |
| STM1047 |      | 1,01 | 0,10 | 2,38 | 0,05 |
| STM1048 |      | 1,03 | 0,10 | 0,52 | 0,05 |
| STM1053 |      | 1,03 | 0,08 | 1,04 | 0,10 |
| STM1063 | pqiA | 1,85 | 0,00 | 0,93 | 0,07 |
| STM1065 | ymbA | 1,09 | 0,05 | 1,07 | 0,01 |

|         |        |      |      |      |      |
|---------|--------|------|------|------|------|
| STM1069 | ycbG   | 3,66 | 0,00 | 0,68 | 0,02 |
| STM1073 | yccS   | 0,80 | 0,04 | 0,44 | 0,01 |
| STM1074 | yccF   | 1,54 | 0,01 | 1,01 | 0,09 |
| STM1077 | yccT   | 0,42 | 0,02 | 1,37 | 0,06 |
| STM1079 | yccV   | 0,96 | 0,04 | 0,70 | 0,04 |
| STM1088 | pipB   | 6,91 | 0,00 | 0,66 | 0,03 |
| STM1103 | hpaD   | 1,06 | 0,07 | 2,11 | 0,05 |
| STM1123 |        | 3,19 | 0,02 | 0,11 | 0,00 |
| STM1130 |        | 0,91 | 0,04 | 2,56 | 0,05 |
| STM1157 | yceI   | 0,94 | 0,09 | 0,15 | 0,01 |
| STM1168 | yceH   | 0,68 | 0,05 | 0,80 | 0,07 |
| STM1212 | ycfJ   | 0,16 |      | 0,63 | 0,06 |
| STM1215 | ycfS   | 0,14 | 0,00 | 0,61 | 0,06 |
| STM1229 | ycfD   | 1,28 | 0,04 | 1,37 | 0,07 |
| STM1236 |        | 0,82 | 0,05 | 0,60 | 0,07 |
| STM1274 | yeaQ   | 0,84 | 0,01 | 0,70 | 0,01 |
| STM1277 | yeaO   | 1,15 | 0,07 | 1,33 | 0,08 |
| STM1280 | yeaL   | 0,59 | 0,03 | 1,29 | 0,05 |
| STM1282 | yeaK   | 1,38 | 0,07 | 5,31 | 0,01 |
| STM1284 | yeaH   | 1,63 | 0,02 | 1,10 | 0,09 |
| STM1317 | celG   | 0,19 | 0,02 | 0,24 | 0,02 |
| STM1324 |        | 0,94 | 0,08 | 1,29 | 0,08 |
| STM1328 |        | 1,62 | 0,06 | 0,86 | 0,08 |
| STM1345 | ydiU   | 1,09 | 0,05 | 1,08 | 0,09 |
| STM1348 | ydiA   | 0,66 | 0,02 | 1,74 | 0,06 |
| STM1369 | sufA   | 0,46 | 0,05 | 1,50 | 0,06 |
| STM1375 | ynhG   | 0,58 | 0,02 | 0,78 | 0,08 |
| STM1389 | orf319 | 1,29 | 0,07 | 0,64 | 0,01 |
| STM1441 |        | 2,37 | 0,04 | 0,98 | 0,10 |
| STM1466 | ydgA   | 1,05 | 0,09 | 1,42 | 0,05 |
| STM1504 | ynfA   | 0,88 | 0,04 | 0,74 | 0,01 |
| STM1515 | ydeI   | 0,33 | 0,01 | 0,33 | 0,03 |
| STM1527 |        | 1,93 | 0,01 | 1,47 | 0,02 |
| STM1573 |        | 0,58 | 0,01 | 0,75 | 0,08 |
| STM1586 |        | 1,72 | 0,01 | 0,82 | 0,09 |
| STM1591 | ydcZ   | 3,24 | 0,03 | 0,12 | 0,01 |
| STM1594 | srfB   | 1,05 | 0,08 | 1,19 | 0,06 |
| STM1595 | srfC   | 0,35 | 0,00 | 1,36 | 0,05 |
| STM1621 |        | 0,76 | 0,01 | 1,76 | 0,03 |
| STM1624 |        | 1,16 | 0,03 | 0,72 | 0,00 |
| STM1628 |        |      |      | 1,18 | 0,02 |
| STM1632 |        | 2,00 | 0,03 | 0,56 | 0,02 |
| STM1637 |        | 3,30 | 0,02 | 0,13 | 0,01 |
| STM1640 | ydcF   | 1,39 | 0,07 | 0,69 | 0,07 |
| STM1644 | ydbL   | 4,24 | 0,02 | 1,63 | 0,05 |
| STM1658 | ydaL   | 1,04 | 0,08 | 0,42 | 0,00 |

|         |       |      |      |      |      |
|---------|-------|------|------|------|------|
| STM1665 |       | 3,58 | 0,02 | 0,15 | 0,01 |
| STM1684 | ycjF  | 1,03 | 0,09 | 1,35 | 0,08 |
| STM1701 | yciW  | 3,88 | 0,02 | 0,23 | 0,01 |
| STM1709 | yciS  | 0,95 | 0,07 | 0,61 | 0,03 |
| STM1729 | yciF  | 1,15 | 0,03 | 0,58 | 0,01 |
| STM1730 | yciE  | 2,57 | 0,04 | 0,73 | 0,07 |
| STM1738 | yciI  | 1,03 | 0,09 | 1,20 | 0,09 |
| STM1740 | yciU  | 0,83 | 0,00 | 0,71 | 0,02 |
| STM1755 | yehJ  | 0,93 | 0,06 | 0,70 | 0,03 |
| STM1773 | yehA  | 1,11 | 0,01 | 0,66 | 0,00 |
| STM1774 | sirC  | 2,31 | 0,01 | 4,50 | 0,01 |
| STM1797 | ymgE  | 0,82 | 0,00 | 0,56 | 0,00 |
| STM1804 | ycgB  | 0,98 | 0,09 | 0,57 | 0,00 |
| STM1811 | ycgN  | 1,55 | 0,02 | 1,43 | 0,07 |
| STM1813 | ycgL  | 1,37 | 0,03 | 1,45 | 0,07 |
| STM1823 | yoaH  | 0,92 | 0,09 | 1,37 | 0,02 |
| STM1833 |       | 0,72 | 0,05 | 2,54 | 0,01 |
| STM1834 | yebN  | 0,23 | 0,03 | 2,23 | 0,02 |
| STM1848 | yebS  | 1,17 | 0,00 | 0,86 | 0,03 |
| STM1880 | yebE  | 1,21 | 0,02 | 0,44 | 0,03 |
| STM1882 | yebG  | 2,99 | 0,01 | 0,46 | 0,04 |
| STM1899 | yebC  | 1,01 | 0,10 | 0,85 | 0,07 |
| STM1903 | yecE  | 1,12 | 0,04 | 1,30 | 0,04 |
| STM1908 | yecM  | 0,39 | 0,05 | 1,28 | 0,01 |
| STM1989 | yedI  | 0,24 | 0,00 | 7,03 | 0,02 |
| STM2001 | yeel  | 0,74 | 0,01 | 0,63 | 0,02 |
| STM2015 | erfK  | 1,21 | 0,02 | 0,69 | 0,00 |
| STM2050 | pduO  | 0,81 | 0,04 | 0,70 | 0,07 |
| STM2059 | yeeX  | 0,93 | 0,05 | 0,60 | 0,01 |
| STM2060 | yeeA  | 0,96 | 0,05 | 0,88 | 0,06 |
| STM2156 | yehR  | 0,81 | 0,06 | 0,89 | 0,09 |
| STM2157 | yehS  | 1,13 | 0,06 | 1,57 | 0,05 |
| STM2170 | yohD  | 0,71 | 0,05 | 0,68 | 0,01 |
| STM2184 | sanA  | 1,17 | 0,03 | 0,72 | 0,03 |
| STM2192 | yehB  | 0,77 | 0,07 | 0,93 | 0,09 |
| STM2202 | yehH  | 1,37 | 0,01 | 2,15 | 0,04 |
| STM2227 | yehL  | 1,20 | 0,06 | 0,82 | 0,06 |
| STM2241 | sspH2 | 0,73 | 0,05 | 1,02 | 0,10 |
| STM2311 | elaB  | 0,76 | 0,06 | 0,77 | 0,08 |
| STM2335 | yfbU  | 0,99 | 0,09 | 0,84 | 0,01 |
| STM2336 |       | 0,95 | 0,08 | 0,61 | 0,00 |
| STM2339 | yfcC  | 0,74 | 0,04 | 0,38 | 0,00 |
| STM2342 |       | 0,82 | 0,03 | 0,84 | 0,02 |
| STM2364 | dedD  | 0,74 | 0,01 | 0,89 | 0,07 |
| STM2367 | dedA  | 0,69 | 0,02 | 0,62 | 0,02 |
| STM2379 |       | 0,40 | 0,03 | 1,05 | 0,08 |

|         |      |             |             |             |             |
|---------|------|-------------|-------------|-------------|-------------|
| STM2381 | yfcM | 1,65        | 0,00        | 0,88        | 0,08        |
| STM2386 | yfcN | 0,92        | 0,03        | 1,34        | 0,01        |
| STM2390 | yfcZ | 1,68        | 0,06        | 0,68        | 0,01        |
| STM2520 | yfgL | 1,18        | 0,04        | 1,28        | 0,08        |
| STM2521 | yfgM | 0,90        | 0,06        | 0,59        | 0,01        |
| STM2524 | yfgA | 0,73        | 0,05        | 0,94        | 0,09        |
| STM2537 | yfhJ | 0,91        | 0,07        | 1,44        | 0,07        |
| STM2541 | yfhF | 1,02        | 0,08        | 0,71        | 0,03        |
| STM2590 |      | <b>2,23</b> | <b>0,00</b> | <b>1,96</b> | <b>0,05</b> |
| STM2592 |      | 0,73        | 0,02        | 0,80        | 0,02        |
| STM2593 |      | 0,79        | 0,04        | 0,70        | 0,02        |
| STM2594 |      | <b>0,14</b> | <b>0,00</b> | <b>6,86</b> | <b>0,01</b> |
| STM2650 | yfiP | 1,01        | 0,08        | 0,89        | 0,04        |
| STM2661 | yfiH | 0,87        | 0,03        | 0,86        | 0,06        |
| STM2686 | yfjF | 0,97        | 0,09        | 1,51        | 0,07        |
| STM2697 |      |             |             |             |             |
| STM2780 |      | 1,65        | 0,00        | 0,71        | 0,08        |
| STM2781 | virK | 1,31        | 0,00        | 0,88        | 0,06        |
| STM2788 |      |             |             |             |             |
| STM2795 | ygaU | 1,37        | 0,02        | 1,03        | 0,10        |
| STM2796 | yqaE | 1,22        | 0,09        | <b>0,13</b> | <b>0,00</b> |
| STM2802 | ygaM | 0,81        | 0,06        | 0,78        | 0,04        |
| STM2804 |      | 1,18        | 0,01        | 0,58        | 0,02        |
| STM2819 | yqaA | 1,69        | 0,01        | 0,94        | 0,09        |
| STM2904 |      | 0,75        | 0,06        | 0,54        | 0,04        |
| STM2917 | ygbK | 1,17        | 0,07        | 1,23        | 0,08        |
| STM2928 | ygbO | 0,73        | 0,04        | 0,85        | 0,09        |
| STM2965 | yqcC | <b>0,30</b> | <b>0,03</b> | <b>2,01</b> | <b>0,02</b> |
| STM2968 | yqcD | 1,48        | 0,02        | <b>1,73</b> | <b>0,04</b> |
| STM2981 | ygdD | 0,81        | 0,04        | 0,85        | 0,05        |
| STM3021 |      | 0,41        | 0,02        | 1,62        | 0,04        |
| STM3023 | yohL | 0,37        | 0,04        | 0,83        | 0,04        |
| STM3034 |      | 0,91        | 0,05        | 0,52        | 0,01        |
| STM3047 | ygfY | 1,20        | 0,03        | 0,82        | 0,03        |
| STM3050 | yqfB | 0,66        | 0,03        | 0,84        | 0,08        |
| STM3060 | ygfE | 1,11        | 0,00        | 0,78        | 0,04        |
| STM3065 | yggE | 0,98        | 0,08        | 0,78        | 0,03        |
| STM3092 | sprT | 7,31        | 0,00        | 0,60        | 0,06        |
| STM3094 | yggJ | 1,06        | 0,09        | 0,74        | 0,01        |
| STM3101 | yggT | 0,98        | 0,09        | 0,79        | 0,03        |
| STM3102 | yggU | 0,84        | 0,09        | 5,77        | 0,02        |
| STM3108 | yggL | 0,86        | 0,09        | 0,87        | 0,09        |
| STM3111 | yggX | 0,92        | 0,06        | 0,65        | 0,02        |
| STM3131 |      | 0,93        | 0,06        | 2,55        | 0,05        |
| STM3153 | yqhA | 0,96        | 0,08        | 1,04        | 0,09        |
| STM3162 | yghB | 0,90        | 0,04        | 0,87        | 0,07        |

|         |      |       |      |       |      |
|---------|------|-------|------|-------|------|
| STM3176 | ygiW | 1,42  | 0,03 | 1,37  | 0,07 |
| STM3180 | ygiN | 1,15  | 0,08 | 0,70  | 0,00 |
| STM3184 | yqiB | 0,65  | 0,00 | 1,34  | 0,05 |
| STM3189 | ygiD | 10,93 | 0,01 | 2,18  | 0,04 |
| STM3196 | yqiC | 0,91  | 0,06 | 0,66  | 0,01 |
| STM3199 | yqiK | 1,07  | 0,09 | 1,97  | 0,00 |
| STM3202 | ygiF | 0,87  | 0,04 | 0,40  | 0,03 |
| STM3207 | ygiH | 1,22  | 0,06 | 0,29  | 0,01 |
| STM3222 | ygiQ | 3,39  | 0,02 | 0,18  | 0,01 |
| STM3226 | yqjA | 2,39  | 0,03 | 0,17  | 0,02 |
| STM3229 | yqjD | 1,49  | 0,03 | 1,13  | 0,09 |
| STM3230 | yqjE | 0,88  | 0,07 | 0,85  | 0,09 |
| STM3232 | yqjF | 0,73  | 0,01 | 1,75  | 0,05 |
| STM3234 | yhaH | 0,83  | 0,00 | 0,78  | 0,03 |
| STM3238 | yhaN | 0,63  | 0,03 | 0,64  | 0,07 |
| STM3270 | yhbP | 0,70  | 0,05 | 1,41  | 0,06 |
| STM3277 |      | 1,29  | 0,07 | 0,68  | 0,02 |
| STM3288 | yhbC | 1,52  | 0,02 | 1,33  | 0,08 |
| STM3317 | yrbK | 1,22  | 0,03 | 1,00  | 0,10 |
| STM3318 | yhbN | 1,13  | 0,05 | 1,50  | 0,07 |
| STM3332 | yhcG | 1,58  | 0,06 | 2,21  | 0,04 |
| STM3347 | yhcB | 1,03  | 0,09 | 1,20  | 0,08 |
| STM3364 | yhcP | 0,24  | 0,03 | 0,45  | 0,04 |
| STM3369 | yhdP | 0,96  | 0,10 | 19,69 | 0,00 |
| STM3378 |      | 1,07  | 0,07 | 1,21  | 0,08 |
| STM3381 | yhdT | 0,83  | 0,05 | 9,46  | 0,02 |
| STM3404 | smg  | 1,52  | 0,03 | 1,22  | 0,08 |
| STM3411 |      | 0,75  | 0,00 | 1,28  | 0,07 |
| STM3452 | yheO | 1,06  | 0,08 | 0,99  | 0,10 |
| STM3454 | slyX | 0,98  | 0,08 | 0,78  | 0,05 |
| STM3463 | yheU | 2,46  | 0,00 | 0,95  | 0,08 |
| STM3467 | yhfK | 0,94  | 0,07 | 0,86  | 0,07 |
| STM3485 | damX | 1,02  | 0,06 | 0,75  | 0,02 |
| STM3516 |      | 0,38  | 0,04 | 3,32  | 0,03 |
| STM3519 | rtcB | 0,17  | 0,02 | 0,74  | 0,08 |
| STM3549 |      | 4,51  | 0,02 | 0,16  | 0,01 |
| STM3573 | yhhL | 0,32  | 0,07 | 5,86  | 0,01 |
| STM3575 | yhhN | 4,19  | 0,02 | 0,47  | 0,02 |
| STM3579 | yhhQ | 0,88  | 0,09 | 5,94  | 0,00 |
| STM3608 | yhjD | 2,28  | 0,06 | 0,78  | 0,08 |
| STM3652 |      | 3,08  | 0,04 | 0,58  | 0,05 |
| STM3658 | viaH | 0,83  | 0,03 | 1,85  | 0,03 |
| STM3659 | viaB | 2,83  | 0,04 | 1,48  | 0,07 |
| STM3679 |      | 1,02  | 0,09 | 1,10  | 0,09 |
| STM3706 | yigQ | 1,12  | 0,01 | 0,62  | 0,04 |
| STM3735 | yicC | 0,95  | 0,07 | 0,66  | 0,01 |

|         |      |       |      |      |      |
|---------|------|-------|------|------|------|
| STM3738 | yigC | 1,19  | 0,02 | 0,71 | 0,02 |
| STM3764 | mgtC | 0,77  | 0,05 | 2,81 | 0,04 |
| STM3777 |      | 1,01  | 0,10 | 0,86 | 0,08 |
| STM3805 | yidH | 2,09  | 0,00 | 0,59 | 0,05 |
| STM3841 |      | 2,86  | 0,01 | 3,42 | 0,01 |
| STM3898 | yifE | 0,92  | 0,04 | 0,93 | 0,09 |
| STM3902 | ilvM | 1,08  | 0,06 | 1,00 | 0,10 |
| STM3906 |      | 0,86  | 0,01 | 1,31 | 0,05 |
| STM3948 | yigA | 0,62  | 0,02 | 0,70 | 0,01 |
| STM3969 | yigN | 0,84  | 0,05 | 0,96 | 0,01 |
| STM3971 | yigP | 3,01  | 0,03 | 0,20 | 0,01 |
| STM3985 | yigZ | 0,75  | 0,07 | 0,96 | 0,10 |
| STM3995 | yihD | 1,30  | 0,05 | 1,62 | 0,06 |
| STM4003 | yihI | 1,08  | 0,03 | 0,97 | 0,09 |
| STM4027 | rbn  | 1,04  | 0,09 | 1,27 | 0,08 |
| STM4031 |      | 0,90  | 0,05 | 0,64 | 0,03 |
| STM4043 | yiiL | 3,26  | 0,02 | 0,75 | 0,03 |
| STM4056 | yiiM | 0,75  | 0,00 | 0,88 | 0,02 |
| STM4071 |      | 0,18  | 0,00 | 1,66 | 0,06 |
| STM4079 | yneC | 18,00 | 0,00 | 1,68 | 0,05 |
| STM4083 | yiiR | 0,99  | 0,09 | 0,99 | 0,08 |
| STM4088 | yiiU | 0,94  | 0,06 | 0,48 | 0,01 |
| STM4107 | yijF | 3,66  | 0,02 | 0,14 | 0,01 |
| STM4169 | yjaG | 0,87  | 0,05 | 0,67 | 0,01 |
| STM4186 |      | 3,84  | 0,02 | 0,25 | 0,02 |
| STM4192 |      | 1,19  | 0,00 | 1,23 | 0,06 |
| STM4206 |      | 0,75  | 0,01 | 1,70 | 0,03 |
| STM4226 | yjbA | 1,44  | 0,02 | 0,76 | 0,06 |
| STM4240 | yjbJ | 0,36  | 0,01 | 1,15 | 0,04 |
| STM4250 | yjbQ | 1,08  | 0,02 | 0,75 | 0,05 |
| STM4251 | yjbR | 0,83  | 0,01 | 0,80 | 0,04 |
| STM4274 | yjcH | 1,08  | 0,08 | 1,09 | 0,08 |
| STM4288 | phnB | 2,65  | 0,04 | 0,47 | 0,04 |
| STM4310 |      | 0,60  | 0,04 | 3,58 | 0,03 |
| STM4317 |      | 1,07  | 0,08 | 1,27 | 0,08 |
| STM4356 | yjeF | 3,84  | 0,01 | 1,82 | 0,01 |
| STM4365 | yjeT | 1,19  | 0,05 | 0,64 | 0,06 |
| STM4370 | yjfl | 0,53  | 0,03 | 1,63 | 0,07 |
| STM4374 | yjfl | 3,66  | 0,02 | 0,14 | 0,01 |
| STM4383 | sgaT | 3,38  | 0,02 | 0,13 | 0,01 |
| STM4411 | ytfP | 0,92  | 0,03 | 0,84 | 0,06 |
| STM4429 |      | 3,80  | 0,02 | 0,14 | 0,01 |
| STM4437 | yjgA | 1,33  | 0,04 | 1,54 | 0,06 |
| STM4464 |      | 1,62  | 0,07 | 0,61 | 0,05 |
| STM4470 | yjgD | 0,96  | 0,05 | 0,68 | 0,04 |
| STM4474 | yjgN | 1,05  | 0,08 | 1,63 | 0,07 |

|         |      |      |      |       |      |
|---------|------|------|------|-------|------|
| STM4490 |      | 0,86 | 0,04 | 0,57  | 0,01 |
| STM4499 | yeeN | 1,07 | 0,07 | 0,92  | 0,08 |
| STM4501 |      | 0,03 |      | 60,86 |      |
| STM4502 |      | 1,06 | 0,08 | 1,14  | 0,07 |
| STM4505 |      | 0,55 | 0,06 | 1,46  | 0,06 |
| STM4509 |      | 1,75 | 0,05 | 1,00  | 0,10 |
| STM4513 | yjiG | 0,53 | 0,01 | 0,48  | 0,00 |
| STM4514 | yjiH | 1,05 | 0,07 | 0,58  | 0,01 |
| STM4516 | yjiN | 2,08 | 0,06 | 2,56  | 0,02 |
| STM4528 |      | 0,66 | 0,01 | 1,06  | 0,09 |
| STM4529 |      | 0,64 | 0,01 | 1,36  | 0,05 |
| STM4531 | yjiX | 0,37 | 0,02 | 1,10  | 0,05 |
| STM4545 |      | 0,27 | 0,02 | 1,16  | 0,08 |
| STM4546 | yjjP | 1,13 | 0,08 | 1,73  | 0,06 |
| STM4549 |      | 1,66 | 0,05 | 0,80  | 0,08 |
| STM4584 | yjjX | 0,58 | 0,06 | 1,16  | 0,09 |
| STM4587 | creA | 1,29 | 0,07 | 0,85  | 0,09 |

### **Supplementary Table S3 legend:**

**Supplementary Table S3: Microarray analysis.** Shown is the effect of cortisol on gene expression of a stationary phase culture of *Salmonella* Typhimurium WT and  $\Delta scsA$ , respectively, during conditions mimicking the intracellular environment. Expression of the untreated control WT group and  $\Delta scsA$  is set to 1. Genes differentially regulated by fold  $< 0.5$  or  $> 2.0$  and with  $P \leq 0.05$  are represented in black letters. Grey letters indicate non-significant changes or changes with a fold  $> 0.5$  or  $< 2.0$ . Microarray data have been deposited in the Gene Expression Omnibus at NCBI with series accession numbers GSE55430.
